# Supplementary material for: Rapid acquisition and model-based analysis of cell-free transcription–translation reactions from nonmodel bacteria
Source: PubMed Central journal article supplement — Proc Natl Acad Sci U S A. 2018 Apr 17;115(19):E4340–9. doi: 10.1073/pnas.1715806115 (PMC5948957; doi:10.1073/pnas.1715806115), 2018-04-17
Supplement: pnas.1715806115.sapp.pdf [file pnas.1715806115.sapp.pdf]

# Rapid acquisition and model-based analysis of cell-free transcription-translation reactions from non-model bacteria

Simon J. Moore<sup>a,b,1</sup>, James T. MacDonald<sup>a,b,1</sup>, Sarah Wienecke<sup>c</sup>, Alka Ishwarbhai<sup>d,e</sup>, Argyro Tsipa<sup>d,e</sup>, Rochelle Aw<sup>a,f</sup>, Nicolas Kyllilis<sup>a,b</sup>, David J. Bell<sup>b,d</sup>, David W. McClymont<sup>b,d</sup>, Kirsten Jensen<sup>a,b,d</sup>, Karen M. Polizzi<sup>a,f</sup>, Rebekka Biedendieck<sup>c</sup> and Paul S. Freemont<sup>a,b,d,2</sup>

<sup>a</sup>Centre for Synthetic Biology and Innovation, Imperial College London, London SW7 2AZ, United Kingdom;

<sup>b</sup>Section for Structural Biology, Department of Medicine, Imperial College London, London SW7 2AZ, United Kingdom;

<sup>c</sup>Institute of Microbiology and Braunschweig Integrated Centre of Systems Biology (BRICS), Technische Universität Braunschweig, Braunschweig, Germany

<sup>d</sup>London DNA Foundry, Imperial College London, London SW7 2AZ, United Kingdom;

<sup>e</sup>Department of Bioengineering, Imperial College London, London SW7 2AZ, United Kingdom;

<sup>f</sup>Department of Life Sciences, Imperial College London, London SW7 2AZ, United Kingdom;

<sup>1</sup>Joint First Authors

<sup>2</sup>To whom correspondence should be addressed:

Professor Paul Freemont

Tel.: +44 (0) 207 594 5327

Fax: +44 (0) 207 594 3057

E-mail address: p.freemont@imperial.ac.uk

## Table of Contents

|                                                                                      |           |
|--------------------------------------------------------------------------------------|-----------|
| <b>Supplementary Text - Extended materials and methods</b>                           | <b>4</b>  |
| Assembly of plasmids                                                                 | 4         |
| <i>B. megaterium</i> cell-free protocol                                              | 5         |
| 96-well plate reader characterisation                                                | 6         |
| 48-well micro-bioreactor characterization                                            | 6         |
| Shake-flask cultivations and SDS-PAGE                                                | 6         |
| GFP and mCherry calibration standards                                                | 6         |
| Preparation of amino acids for NCF reactions                                         | 7         |
| <i>in vitro</i> RNA synthesis of the malachite green aptamer (MGapt)                 | 7         |
| qRT-PCR                                                                              | 8         |
| Recombinant production and purification of XylR <sup>His</sup>                       | 8         |
| Mathematical modelling of cell-free transcription-translation                        | 9         |
| Bayesian modelling of the cell-free system                                           | 10        |
| LC-MS/MS proteomics                                                                  | 12        |
| Semi-automated cell-free screening of RBS library parts                              | 13        |
| Library construction                                                                 | 13        |
| 96-well DNA purification                                                             | 14        |
| Low-volume cell-free screening reactions                                             | 14        |
| <b>Supplementary Text – Extended results</b>                                         | <b>15</b> |
| Optimisation of a <i>B. megaterium</i> DSM319 cell-free extract                      | 15        |
| Optimisation of <i>B. megaterium</i> DSM319 cell-free buffer conditions              | 15        |
| Energy buffer                                                                        | 15        |
| Testing of the xylose-repressor system                                               | 16        |
| Cell-free GFP and mCherry production at different temperatures                       | 16        |
| Codon optimised mCherry synthesis                                                    | 16        |
| Bayesian modelling of energy consumption                                             | 17        |
| Inactivity of the <i>pyk</i> and <i>tpi</i> constitutive promoters                   | 18        |
| Effect of NaCl, glycerol and xylose on cell-free activity                            | 18        |
| <b>Supplementary Text – DNA sequences</b>                                            | <b>19</b> |
| DNA parts used in this study and assembled with EcoFlex                              | 19        |
| <i>B. megaterium</i> DSM319 putative Sigma A promoters                               | 20        |
| Other DNA parts                                                                      | 22        |
| <b>Supplementary Figures</b>                                                         | <b>26</b> |
| S1 Recombinant protein synthesis in <i>B. megaterium</i>                             | 26        |
| S2 Fluorescence protein standards                                                    | 27        |
| S3 <i>B. megaterium</i> <i>in vivo</i> constitutive promoter testing                 | 28        |
| S4 <i>B. megaterium</i> <i>in vivo</i> xylose-inducible promoter testing             | 29        |
| S5 Optimization of the <i>B. megaterium</i> DSM319 cell-free extract                 | 30        |
| S6 GFP and mCherry production in <i>B. megaterium</i> NCF                            | 31        |
| S7 mCherry G+C (%) variants                                                          | 32        |
| S8 NCF RNA (nM) synthesis of constitutive promoters                                  | 33        |
| S9 NCF GFP (µM) synthesis of constitutive promoters                                  | 34        |
| S10 Correlation of constitutive promoter activity <i>in vitro</i> and <i>in vivo</i> | 35        |
| S11 Design of the malachite green aptamer                                            | 36        |
| S12 Denaturing PAGE gel of the GFP-MGapt transcript                                  | 37        |

## Table of Contents - Supplementary Figures continued

|     |                                                                     |    |
|-----|---------------------------------------------------------------------|----|
| S13 | Optimising the malachite green concentration for NCF                | 38 |
| S14 | mRNA standards and decay for the malachite green aptamer            | 39 |
| S15 | qRT-PCR time-course measurement                                     | 40 |
| S16 | GFP-MGapt standards                                                 | 41 |
| S17 | XylR <sup>His</sup> purification                                    | 42 |
| S18 | Bayesian model parameter inference of pKMMBm5 titration             | 43 |
| S19 | Modelled and experimental time-course - 1 nM pKMMBm5                | 44 |
| S20 | Modelled and experimental time-course - 2 nM pKMMBm5                | 45 |
| S21 | Modelled and experimental time-course - 5 nM pKMMBm5                | 46 |
| S22 | Bayesian model parameter inference of xylose-XylR experiment        | 47 |
| S23 | QconCAT_Bm_NCF <sup>His</sup> purification                          | 48 |
| S24 | RpoD <sup>His</sup> purification                                    | 49 |
| S25 | LC-MS/MS quantitation of NCF proteins                               | 50 |
| S26 | LC-MS/MS <sup>15</sup> N labelled calibration standards             | 51 |
| S27 | <sup>14</sup> N and <sup>15</sup> N MS spectra of selected peptides | 52 |
| S28 | XylR-Xylose preliminary experiments                                 | 53 |
| S29 | Bayesian model parameter inference of resource competition          | 54 |
| S30 | Experimental and simulated GFP / mRNA data from Fig. 4              | 55 |
| S31 | Inferred mCherry mRNA data from Fig. 4                              | 56 |
| S32 | Modelled translated amino acid pool in respect of DNA               | 57 |
| S33 | Predicted free ribosome concentrations                              | 58 |
| S34 | Predicted number of ribosomes per GFP mRNA polysome                 | 59 |
| S35 | Predicted number of ribosomes per mCherry mRNA polysome             | 60 |
| S36 | Modelled translated amino acid pool in respect of NTP               | 61 |
| S37 | Western blot of anti-GFP for constitutive promoters                 | 62 |
| S38 | Box and whisker plot of 96-well mini-preps for RBS variants         | 63 |
| S39 | Ranked RBS activities of selected RBS-4, -5, -6 and -7 variants     | 64 |

## Supplementary Tables

|     |                                                          |    |
|-----|----------------------------------------------------------|----|
| S1  | Plasmid list                                             | 65 |
| S2  | PCR oligonucleotides                                     | 66 |
| S3  | Comparison of cell-free data from Garamella <i>et al</i> | 67 |
| S3  | EcoFlex PCR oligonucleotides                             | 68 |
| S4  | Sequencing oligonucleotides                              | 69 |
| S5  | Preparation of amino acids                               | 70 |
| S6  | LC-MS/MS QconCAT and Sigma A peptides                    | 71 |
| S7  | Peptide ions and retention times                         | 72 |
| S8  | Modelled data of the xylose-inducible promoter system    | 73 |
| S9  | Modelled data of the resource competition experiment     | 75 |
| S10 | Separation method for SRM LC-MS/MS analysis              | 78 |
| S11 | RBS-6 library parts                                      | 79 |
| S12 | RBS-4, -5, -7 and -8 library parts                       | 80 |

## Supplementary References

81

## Supplementary Text - Extended materials and methods

### *Assembly of plasmids*

For the construction of plasmids pRBBm257 and pRBBm258 the promoter region of the operon *bmd\_1326-1329* (encoding the four components of the pyruvate dehydrogenase of *B. megaterium*) was amplified via polymerase chain reaction (PCR) using the Phusion polymerase (New England Biolabs, Frankfurt, Germany) from genomic DNA of *B. megaterium* DSM319 with the primers RB216fw (AflII) and RB217rv (SpeI). AflII-/SpeI-digested PCR product was introduced into AflII/SpeI-digested p3STOP1623hp (1) and pSSBm85 (1), respectively, replacing the *xylR* gene and xylose-inducible promoter, resulting in pRBBm257 and pRBBm258, respectively (Table S1). For construction of pSWBm25, primer pair SW55fw (BglII) / SW56rev (EagI) was used to PCR-amplify *mCherry* from pKMMBm2 (2). The PCR product was cloned with BglII and EagI into p3STOP1623hp (1). For pRBBm266, the *mCherry* gene was PCR-amplified from pKMMBm2 (2) with primer pair RB233fw (SpeI) / RB234rv (SphI). SpeI/SphI-digested PCR product was cloned into pRBBm257 giving pRBBm266. pRBBm267 and pSWBm24 were constructed in a similar way. A *B. megaterium* codon optimised *mCherry* variant was synthesised by Life Technologies™ GeneArt™ (Regensburg, Germany) and cloned into BglII and SphI. This was adapted for Golden Gate cloning using PCR with the primers *mCherry\_Bm\_NdeI\_F* and *mCherry\_Bm\_BamHI\_R* and cloned into pBP-ORF-*lacZ*. For further details please see DNA sequences. pRBec2 was constructed by PCR-amplifying *xylR*<sub>DSM319</sub> with primers RB128fw (BamHI) and RB129rv (BamHI) from pMM1525(3). BamHI-digested PCR product was introduced into BamHI-digested pET14b (Novagen, Germany) in such a way that the pET14b encoded His<sub>6</sub>-tag was fused in frame to the 5' end of *xylR*, hereafter referred to as *XylR*<sup>His</sup>. The malachite green aptamer (MGapt) was cloned with the Bba\_B0015 terminator (4) through two rounds of PCR and introduced between the *AgeI* and *SphI* sites, downstream of the *gfp* stop codon in pKMMBm5(2) resulting in pKMMBm5-MGapt (pSJM673). For EcoFlex assembled plasmids, please refer to later in the text.

Plasmids were purified with the Qiagen Plasmid Mini and Midi Kit (Qiagen, Hilden, Germany) and dissolved in distilled water. dsDNA and ssRNA concentrations were measured using a nanodrop reader (PepLab, Erlangen, Germany). All DNA sequences of the cloned genes were verified by DNA sequencing (GATC Biotech AG, Konstanz, Germany and Source Bioscience, Cambridge, UK, respectively). PCR oligonucleotides are listed in Table S2 and S4. Sequencing oligonucleotides are provided in Table S4.

## *B. megaterium* cell-free protocol

### *Step 1 – Growth and S30A wash steps*

For extract optimisation, samples were prepared as triplicate biological repeats. A 50 mL 2YT overnight pre-culture of *B. megaterium* DSM319 derived from a single colony was grown at 30°C, 100 rpm for 12 hrs. The pre-culture was diluted 50-fold into 0.6 L 2YT media and incubated at 37°C, 200 rpm until an OD<sub>578</sub> of 2.0 was reached (early-logarithmic growth phase). Cells were centrifuged at 6000 × *g*, 4°C for 20 min. The supernatant was discarded and cells were washed with 200 mL of buffer S30A and centrifuged at 6000 × *g*, 4°C for 10 min. This was repeated again, before re-suspending the cells in 25 mL buffer S30A. Then to remove excess buffer, cells were centrifuged at 45,000 × *g*, 4°C for 10 min, followed by careful removal of the supernatant. The cell pellet was weighed (~7.8 gram per litre of culture) and re-suspended in 0.9 volumes of buffer S30A per gram of wet cells, before flash freezing in liquid nitrogen.

### *Step 2 – Sonication*

Sonication was the first variable to be optimised and tested by varying energy input. Triplicate biological repeat pre-cultures were used to inoculate 0.5 L of 2YT medium, which were incubated at 30°C with fast shaking until an OD<sub>600</sub> of 2.0 was reached. After washing and re-suspension (0.9 mL S30A buffer per mL of wet cells), 0.25 mL of wet-cell paste was sonicated for 10, 20, 40, 60 and 90 seconds in triplicate and average energy inputs were recorded as 85, 165, 274, 368, 538 Joules per mL, respectively (Fig. S5). In addition, we also tested the effect of sample pre-treatment with 250 µg mL<sup>-1</sup> of lysozyme at 37°C for 10 min to increase cell-lysis. After sonication, all samples were incubated at 37°C for 1 hour, then clarified by centrifugation before freezing in liquid nitrogen. Lysozyme pre-treated samples decreased activity by approximately 35% in comparison to non-treated samples. Optimum activity was observed with an energy input of 165 Joules per mL in the absence of lysozyme (Fig. S5).

### *Step 3 - “Run-off” incubation*

In cell-free extract preparation a heated incubation step post cell-lysis is unofficially referred to as a “run-off” step. Although not investigated at the biochemical level in detail, this particular stage of optimisation is believed to degrade fragmented genomic DNA through the release of endogenous nucleases, whilst allowing incomplete metabolic reactions to run to completion. For *B. megaterium* DSM319, triplicate biological repeats of supernatant aliquots (250 µL) were incubated in a run-off reaction, which was tested at 30°C and 37°C for a range of incubation of periods. Aliquots were then centrifuged at 18,000 × *g*, 4°C for 10 min to remove precipitate and then tested for activity. The optimum and minimal incubation temperature duration was 37°C for 1 hour for both growth temperature (Fig. S5). Additionally, we observed that if *B. megaterium* DSM319 was grown at 30°C, GFP synthesis was higher, whilst extract activity during a 30°C “run-off” peaked later and remained stable up to 6 hours (Fig. S5).

*Step 4 – Dialysis:* Dialysis is a common step for removing small molecules after the “run-off” step that potentially inhibit *in vitro* transcription-translation reactions. Biological repeats of *B. megaterium* DSM319 cell-extracts were also dialysed

with Buffer S30B for 4 hours at 4°C and then compared against non-dialysed extract batches. In summary, we didn't observe a significant and consistent response to dialysis treatment (Fig. S5) and subsequently, dialysis was not used for further extract preparations.

#### *Activity comparison of the constitutive and xylose-inducible promoters in vivo*

##### *96-well plate reader characterisation*

A single colony of *B. megaterium* DSM319 recombinant plasmid strains was inoculated and grown in 100  $\mu$ L LB with 10  $\mu$ g mL<sup>-1</sup> of tetracycline (LB+Tet) in a 96-well plate at 600 rpm, 30°C for 6 hours using a ClarioStar (BMG LabTech, Germany) plate reader. For constitutive promoter plasmid strains, the initial OD<sub>600</sub> was recorded and the cultures were diluted into fresh medium to an OD<sub>600</sub> = 0.02. For the xylose-inducible promoter (pSSBm85) plasmid strain, the initial OD<sub>600</sub> was set to 0.4. The experiment was performed as a quadruplicate biological repeat in either LB+Tet or LB+Tet with 0-1% (w/v) D-xylose to induce gene expression from the xylose inducible promoter plasmid strain (pSSBm85). The growth was continued for 16 hrs under the same conditions. The OD<sub>600</sub> and GFP measurements were recorded every 10 minutes (Fig. S3-4).

##### *48-well micro-bioreactor characterization*

2.5 mL of LB+Tet pre-culture in a 15 mL falcon tube was inoculated from a single colony and incubated at 37°C, 220 rpm overnight. For 48 Well FlowerPlate® cultivation, 1 mL of LB+Tet medium was transferred to each well and inoculated with pre-culture volume adjusting to an OD<sub>578 nm</sub> of 0.055. 48 Well FlowerPlate® was covered with gas-permeable membrane (m2p-labs, Baesweiler, Germany) and incubated in Biolector® at 30°C and 1400 rpm. The relative fluorescence units of GFP were directly measured by Biolector® at a wavelength of 488 nm. Biomass (scattered light units) was measured at a wavelength of 620 nm. A calibration of OD<sub>600</sub> measurements was run in parallel to convert scattered light units into OD<sub>600</sub>.

##### *Shake-flask cultivations and SDS-PAGE*

An overnight culture of 100 mL LB+Tet was diluted 1/100 into fresh medium and aerobically cultivated at 37°C and 250 rpm. Time point zero (t = 0) was set when the cultures reached an OD<sub>578</sub> of 0.3. At this time-point, 0.5 % (w/v) D-xylose was added to cultures carrying a recombinant plasmid with the xylose inducible promoter. Samples for intracellular protein (Fig. S1) were taken after 6 hours of growth and analysed by SDS-PAGE as described previously (5).

##### *GFP and mCherry calibration standards*

GFP and mCherry were assembled by Golden Gate cloning method under the control of the T7 promoter with a N-terminal His<sub>6</sub>-tag and the BBa\_B0015 terminator using the EcoFlex assembly kit (4). *E. coli* Rosetta (DE3) pLysS strain (Novagen, Germany) was individually transformed with plasmids pSJM579 and pSJM687 encoding His<sub>6</sub>-tagged GFP and mCherry, respectively, and grown for 24 hrs in 2 mL of 2YT medium (20 g tryptone, 10 g yeast extract and 5 g of NaCl per litre) at 30°C. His<sub>6</sub>-tagged proteins were purified as described with XylR<sup>His</sup>. Purified enzymes were dialysed against 2 litres of 20 mM of HEPES (pH 7.5) and 50 mM NaCl for 16 hrs at 4°C. mCherry protein

concentration was determined using the absorbance extinction coefficient of  $72,000 \text{ M}^{-1} \text{ cm}^{-1}$  at 587 nm. For GFP, this was estimated by  $A_{280}$  and Bradford assay. Calibration standards were prepared in triplicate 10  $\mu\text{L}$  cell-free reactions with  $10 \text{ mg mL}^{-1}$  of cell-extract and standard energy mix conditions, then equilibrated at  $30^\circ\text{C}$  for 10 min before measuring on a ClarioStar plate-reader. Fluorescence measurements were recorded using a filter for GFP (Ex 482/15, Em 530/40, 600 gain) and monochromator for mCherry (Ex 570/15, Em 620/20, 1600 gain). For quantifying GFP and mCherry concentrations in experimental data, the average background for the negative control (pRBBm99 – Empty vector) incubation at each time point was subtracted from the corresponding data point. The concentration of each data point was then estimated using the GFP and mCherry calibration standards that were fitted in GraphPad (Prism7) (Fig. S2).

#### *Preparation of amino acids for NCF reactions*

The *B. megaterium* DSM319 extracts were found to be sensitive to high salt conditions, so we prepared the amino acid mixture with minimal potassium hydroxide base to neutralise the pH to 7.5. The amino acid solution was prepared as follows. 40 mL of distilled water was stirred and heated to approximately  $42^\circ\text{C}$ . Each amino acid was then weighed (Table S6) and dissolved one at a time until the liquid was clear. This ranged from a few seconds up to 5 min for cysteine and some of the hydrophobic amino acids (leucine, tyrosine). The solution was adjusted to pH 7.5 using 25  $\mu\text{L}$  aliquots of 4 M potassium hydroxide until a final concentration of 26 mM of KOH was reached. The volume was then adjusted to 50 mL and aliquots were stored at  $-80^\circ\text{C}$ . Aliquots were defrosted at  $42^\circ\text{C}$  for 5 min to re-dissolve any precipitate after freezing. The final 4  $\mu\text{L}$  stock concentration was 5 mM for L-leucine and 6 mM for the remaining amino acids.

#### *in vitro RNA synthesis of the malachite green aptamer (MGapt) and cell-free measurements*

The *gfp-MGapt* fragment (Fig. S11) of pSJM673 was placed under the transcriptional control of a T7 promoter by sub-cloning the NcoI/PvuI-fragment into pTU1-A-T7-ET-GFP-Bba\_B0015 resulting in pSJM734. Further, the region containing the T7 promoter, RBS, *gfp* gene, *MGapt* and the Bba\_B0015 terminator of pSJM734 was amplified by *in vitro* transcription using the primers VF2 and Bba\_B0015endREV. *in vitro* transcription was carried out with the MEGAscript<sup>®</sup> T7 Transcription Kit (Ambion<sup>®</sup>). MEGAclean<sup>™</sup> Transcription Clean-Up Kit (Ambion<sup>®</sup>) was used to purify mRNA transcript and checked for purity on a 5% TBE-urea PAGE gel (Fig. S12) with the low range ssRNA ladder (New England Biolabs, Hitchin, UK). For preparing standards, purified *gfp-MGapt* mRNA was used in concentrations from 50 to 1000 nM and mixed with  $10 \text{ mg mL}^{-1}$  of cell-free extract, amino acids and energy buffer as described for real-time transcription-translation experiments. To reduce mRNA decay during preparation, plates were pre-incubated at  $-20^\circ\text{C}$ , whilst mRNA standards were prepared on ice, transferred to plates as 10  $\mu\text{L}$  aliquots (quadruplicate repeat) and then briefly centrifuged ( $\sim 1,000 \times g$  for 10 sec at  $4^\circ\text{C}$ ). Fluorescence was optimised for malachite green concentration (Fig. S13). mRNA standards were recorded every 30 sec at  $30^\circ\text{C}$  for 120 min (Fig. S14). A 1  $\mu\text{M}$  GFP-MGapt mRNA transcript was also spiked into the reaction and monitored for malachite

green and GFP fluorescence signals, in comparison to pRBBm258-MGapt plasmid control (Fig. S16).

#### *qRT-PCR*

A cell-free transcription-translation time-course reaction containing 10 nM of the PDH-RiboJ-GFP-MGapt-Bba\_B0015 plasmid was incubated on a heat block at 30°C (Fig. S15). 150 µL samples were removed at set time points and frozen in liquid nitrogen. 150 µL of RNeasy<sup>TM</sup> (Qiagen) was added to each sample, thawed at room temperature and mixed. For quantitative Reverse Transcription (qRT)-PCR, RNA was isolated using RNeasy<sup>®</sup> Mini Kit (Qiagen) according to manufacturer's instructions. cDNA was prepared using the High-Capacity cDNA Archive Kit (Applied Biosystems, Warrington, UK) according to the manufacturer's instructions. 1 µg RNA was used in a total reaction volume of 20 µL. qRT-PCR reactions were set up using the 2X SYBR<sup>®</sup> Green JumpStart Taq Ready Mix (Sigma-Aldrich, Dorset, UK). An Eppendorf Mastercycler<sup>®</sup> ep *realplex* quantitative cycler was used (Eppendorf UK Ltd, Histon, UK). Data was analysed using the Pfaffl method, based on  $\Delta\Delta$ -Ct (6, 7) and normalised to 16S RNA as the housekeeping gene. Primers for 16S were TTCGAAGCAACGCGAAGAAC and AACCCAACATCTCACGACAC. Primers for *gfp* were ATACTCCAATTGGCGATGGC and TCCCAGCAGCAGTTACAAAC. Cycling conditions were 95°C for 5 minutes followed by 40 cycles of 95°C for 30 seconds, 55°C for 30 seconds and 72°C for 30 seconds with a melting curve afterwards to ensure a single product was being measured. All samples were normalised to 0 minutes for analysis.

#### *Recombinant production and purification of XylR<sup>His</sup>*

*E. coli* strain BL21 (DE3) Star<sup>TM</sup>-pLysS (LifeTechnologies, Darmstadt, Germany) and auto-induction strain *E. coli* BL21 were individually transformed with plasmid pRBEc2. The recombinant BL21 strain was grown in 1 L of LB medium with 100 µg ml<sup>-1</sup> of carbenicillin at 37°C for 6 hrs. After the addition of 0.4 mM of IPTG the culture was shifted to 19°C and was incubated for 16 hrs. For cell harvesting cultures were centrifuged (6000 × *g*, 15 min) and the cells were re-suspended in 20 mL of binding buffer containing 40 mM of HEPES (pH 7.5), 500 mM of NaCl and 10 mM of imidazole. Cells were lysed by sonication for 2 s on and 2 s off cycles for 5 min at 65% amplitude, with cooling on ice. After centrifugation at 12,000 × *g* for 15 min at 4°C, recombinant XylR<sup>His</sup> was purified from the supernatant at 4°C with metal ion affinity chromatography (IMAC) using 2 mL nickel resin (GE Healthcare). After loading, the column material was washed with 10 column volumes (CV) of wash buffer I (50 mM imidazole), 5 CV of wash buffer II (100 mM imidazole) and 5 CV of elution buffer (400 mM imidazole). Soluble and insoluble crude extracts and elution fractions were collected and analysed for purity by 12 % SDS-PAGE (Fig. S17) using a protein molecular weight marker (Fisher). Purified XylR<sup>His</sup> is relatively unstable and slowly precipitates after purification or freezing despite optimisation of buffer conditions, whilst glycerol cannot be added since it is detrimental to cell-free activity with 0.1% (v/v) and 0.5% (v/v) glycerol reducing activity by 47% and 80%, respectively (Fig. S28). To study XylR<sup>His</sup>, the purified protein was freshly purified for each experiment. To do this, eluted protein was rapidly buffer-exchanged with a PD-10 column (GE Healthcare) into 20 mM HEPES (pH 7.5) and 400 mM NaCl (Buffer A) to remove imidazole, which we found to accelerate



precipitation of XylR<sup>His</sup>. XylR<sup>His</sup> was further dialysed in Buffer A for 2 hours at 4°C using a 10 kDa MWCO membrane (ThermoFisher). Precipitate was removed by centrifugation and then protein concentration was determined by Bradford assay. XylR<sup>His</sup> was freshly purified for each experiment and rapidly dispensed with energy buffer, amino acids, extract, xylose and plasmid DNA using an Echo® 525 liquid handling system (LabCyte).

### *Mathematical modelling of cell-free transcription-translation*

A general ordinary differential equations (ODE) model scheme was created to account for the expression of single or multiple genes in the same reaction. This model included accounting for the use of shared resources (NTPs, amino acids, RNA polymerase, and ribosomes). Transcription was modelled using three reactions: RNAP binding to the promoter, promoter escape, and transcription elongation.

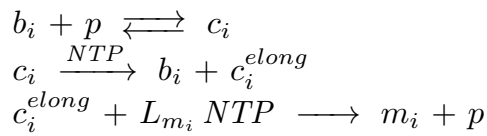

Where,  $p$  is an RNA polymerase,  $b_i$  is a free promoter site, and  $c_i$  is the promoter site with a bound RNAP,  $c_i^{elong}$  is the corresponding coding sequence being transcribed,  $m_i$  is a corresponding mRNA transcript, and  $L_{m_i}$  is the length of the transcript  $m_i$ . Similarly, translation was modelled using three reactions: ribosome binding to the RBS, translation initiation and translation elongation.

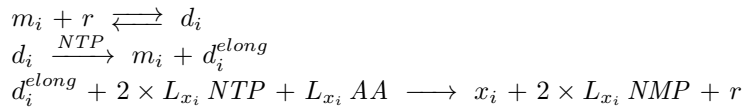

Where,  $r$  is a ribosome,  $d_i$  is an mRNA with a ribosome bound to the RBS,  $d_i^{elong}$  is an mRNA with a ribosome in elongation phase,  $x_i$  is a translated protein,  $L_{x_i}$  is the length of protein  $x_i$ . Four additional reactions were also used to model first order mRNA degradation into NMPs, first order degradation of NTP to NMP to model the effect of energy consumption by non-productive NTPase side-reactions, the regeneration of NTP from NMP using the secondary energy source,  $S$ , and a first order degradation reaction to model the inactivation of ribosomes (8).

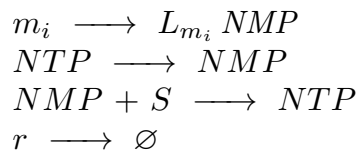

Transcription elongation, translation elongation, and NTP regeneration reactions were modelled assuming multi-substrate Michaelis-Menten kinetics with random order binding of reactants for simplicity.

### *Bayesian modeling of the cell-free system*

Two different ordinary differential equation models of cell-free transcription/translation were created based on the reaction scheme outlined in the main paper. A single promoter model was created for the xylose inducible promoter, and a two promoter model was created for the resource competition experiments. Both of these models are available as SBML and C header files in the GitHub repository ([https://github.com/jmacdona/ODE\\_MCMC\\_tools](https://github.com/jmacdona/ODE_MCMC_tools)).

A Markov chain Monte Carlo (MCMC) algorithm with an adaptive proposal distribution was used to sample from the posterior distribution given the experimental data. C++ source code implementing the algorithm, together with instructions and an example data set are available to download from the same repository. The software can also search for local optima using quasi-Newton minimization. A system of ODEs is defined in a C header file using the same header format as exported by COPASI (9) and then compiled into a binary executable file for fast parameter inference. The Boost.odeint library was used to numerically integrate the system of ODEs and the Ceres Solver library was used for quasi-Newton optimization (10). Jacobian matrices and gradient vectors were determined numerically using a finite difference method. The software allows parameter inference from multiple experimental datasets under different experimental conditions and time resolutions.

The C++ MCMC software takes a number of command line arguments including the initial multivariate normal (MVN) proposal distribution, experimental data sets, and initial parameter values. Example input files and command line arguments are provided with the software distribution. Data sets are formatted as tab-separated files and contain the means and standard deviations of experimentally measured GFP or mRNA concentrations over time at different template DNA, XylR, and xylose concentrations. The MVN proposal distribution covariance matrix is also formatted as a tab separated text file.

The experimentally measured GFP and mRNA trajectories, and corresponding experimental conditions (i.e. defined as a subset of defined parameter values and/or initial values) are stored in a `std::map` data structure and used to evaluate the log likelihood function during MCMC.

The system of ODEs were numerically integrated using the Boost.Numeric.odeint C++ library for multiple experimental conditions with the same parameter vector and the overall log-likelihood function evaluated (equation S1). The Gaussian log-likelihood function can be replaced with a Student's t-distribution with a user-definable number of degrees of freedom,  $\nu$ , for more robust parameter estimation (11). The Metropolis-Hastings algorithm with the standard acceptance criterion (equation S2) was used to generate the Markov chain using a MVN proposal distribution and a uniform or MVN prior.

Equation S1

$$\log \mathcal{L}(\boldsymbol{\theta}|\boldsymbol{\mu}, \boldsymbol{\sigma}) = \sum_{c \in \mathcal{C}} \sum_{s \in \mathcal{S}} \sum_{t=0}^T \log f(x_{c,s,t}(\boldsymbol{\theta})|\mu_{c,s,t}, \sigma_{c,s,t})$$

where  $\mathcal{C}$  is the set of experimental condition (e.g. XylR, xylose and DNA concentrations),  $\mathcal{S}$  is the set of chemical species (e.g. mRNA or GFP<sub>mat</sub>), and  $t$  is the time point.  $f(x|\mu, \sigma)$  is the probability density function of the Gaussian distribution with mean,  $\mu$ , and standard deviation,  $\sigma$ .  $x_{c,s,t}(\boldsymbol{\theta})$  is the simulated concentration of species,  $s$ , at time,  $t$ , given experimental condition,  $c$ , and parameter vector,  $\boldsymbol{\theta}$ .  $\mu_{c,s,t}$  and  $\sigma_{c,s,t}$  are the mean and standard deviation of the experimentally measured concentration of species,  $s$ , at time,  $t$ , and experimental condition,  $c$ .

Equation S2

$$A(\boldsymbol{\theta}'|\boldsymbol{\theta}) = \min \left( 1, \left[ \frac{\mathcal{L}(\boldsymbol{\theta}')\pi(\boldsymbol{\theta}')}{\mathcal{L}(\boldsymbol{\theta})\pi(\boldsymbol{\theta})} \right]^\beta \right)$$

where  $\pi(\boldsymbol{\theta})$  is the prior distribution,  $\mathcal{L}(\boldsymbol{\theta})$  is the likelihood function,  $\boldsymbol{\theta}$  is the current parameter vector,  $\boldsymbol{\theta}'$  is the proposed parameter vector and  $\beta$  is the thermodynamic beta. Normally  $\beta = 1$  but is set to a range of different values during parallel tempering to improve sampling of parameter space.

The proposal distribution was adapted using the robust adaptive Metropolis (RAM) algorithm with a target acceptance rate of 0.234 (12).

In addition to standard MCMC, the software is able to carry out parallel tempering MCMC with multiple threads (using the Boost.thread C++ library to manage the threads). This permits the simultaneous exploration of parameter space at different “temperatures” (as controlled by the thermodynamic beta parameter in equation S2) with the probability of exchanges between the different Markov chains determined by equation S3. This was used to extensively explore parameter space to find regions of high probability before running standard MCMC production runs to obtain the final posterior distribution estimates.

Equation S3

$$p = \min \left( 1, \frac{(\mathcal{L}(\boldsymbol{\theta}_i)\pi(\boldsymbol{\theta}_i))^{\beta_j} (\mathcal{L}(\boldsymbol{\theta}_j)\pi(\boldsymbol{\theta}_j))^{\beta_i}}{(\mathcal{L}(\boldsymbol{\theta}_i)\pi(\boldsymbol{\theta}_i))^{\beta_i} (\mathcal{L}(\boldsymbol{\theta}_j)\pi(\boldsymbol{\theta}_j))^{\beta_j}} \right)$$

where  $i$  and  $j$  are two independent MCMC chains with parameter vectors  $\boldsymbol{\theta}_i$  and  $\boldsymbol{\theta}_j$ , and thermodynamic betas  $\beta_i$  and  $\beta_j$  respectively.

Multiple independent Markov chains were run from different initial parameter values and random seeds. Chains were checked for convergence using with the Gellman-Rubin diagnostic (13) as implemented in the R CODA package (14).

### LC-MS/MS proteomics

A LC-MS/MS protocol was developed based on previous studies (15–17) to quantify proteins in the cell-extracts. To begin a preliminary tryptic digest of a *B. megaterium* cell-extract experiment was performed and analysed by LC-MS/MS. Two diagnostic tryptic peptides for each protein to be measured were selected for the targeted LC-MS/MS method. This was achieved by comparison of the peptides identified for each protein from auto-MS/MS analysis of digested samples with those predicted to be suitable for measurement by LC-MS/MS using Peptide Selector software (Agilent, Santa Clara, CA). By combining the recorded retention LC times and target precursor masses, a method to determine the concentration of proteins was developed. From this initial screen, we could not identify sufficient coverage of the Sigma A protein (RpoD), which is the major regulator of gene expression in *Bacillus* species. Based on this evidence, a *B. megaterium* DSM319 synthetic peptide (QconCAT\_Bm\_NCF) was designed to target two peptides for the S4, S7, L2, L4 ribosomal proteins, RNA polymerase  $\beta$  subunit and alanyl- and methionyl-tRNA synthetases. The QconCAT peptide was also fused with a sacrificial peptide and internal calibration standard (GluFib B). To positively identify the Sigma A factor (RpoD) from the cell-extracts, this was prepared as a full-length sequence, amplified by PCR from *B. megaterium* DSM319 genomic DNA. Both QconCAT\_Bm\_NCF and *rpoD* gene products were assembled with EcoFlex (47) with a T7 promoter, N-terminal His<sub>6</sub>-tag and transformed into *E. coli* BL21 Gold (DE3), grown and induced (with 0.4 mM IPTG) in either LB or M9 minimal medium supplemented with 0.2% (w/v) glucose and <sup>15</sup>NH<sub>3</sub>Cl for isotope labelling. From expression in LB medium, the 27.4 kDa <sup>His</sup>QconCAT protein was purified with IMAC under denaturing (8M urea) conditions. Inclusion bodies were unfolded prior to purification by incubating at 80°C for 30 min in unfolding buffer (20 mM Tris-HCl pH 8, 0.5 M NaCl, 8M urea and 5 mM imidazole). RpoD (45.6 kDa) was purified under native conditions. Proteins were verified by SDS-PAGE (Fig. S23-24) and confirmed to be highly pure. For LC-MS/MS, 2 mL of concentrated protein was dialysed overnight in 2 L of ddH<sub>2</sub>O at 4°C. Proteins were then lyophilised in a vacuum centrifuge and then dissolved in 0.1M ammonium bicarbonate, 10% (v/v) methanol (ABC buffer). Protein concentration was estimated by absorbance at 280 nm with the extinction coefficients of 11,460 and 25,900 M<sup>-1</sup> cm<sup>-1</sup> for QconCAT\_Bm\_NCF and RpoD, respectively.

For preparation of the cell-extracts for SRM LC-MS/MS, 100  $\mu$ L of cell-extract (30 mg mL<sup>-1</sup>) was dialysed in 2 L of 20 mM Tris-HCl at 4°C for 2 hours. A 1.5-fold dilution was recorded after dialysis. 100  $\mu$ L of purified standards and cell-extracts (20 mg mL<sup>-1</sup>) were reduced with 50  $\mu$ L of 25 mM dithiothreitol at 80°C for 15 min. 50  $\mu$ L of 25 mM iodoacetic acid was added, vortexed and left in the dark for 30 min. Samples were diluted with 250  $\mu$ L of ABC buffer and vortexed briefly. 75  $\mu$ L of samples containing cell-extract and internal <sup>15</sup>N calibration standards (0.5  $\mu$ M) were digested with 25  $\mu$ L of 0.12 mg mL<sup>-1</sup> mass spectrometry grade trypsin (Promega, USA).

The targeted LC-MS/MS method was applied using an Agilent 1290 LC system coupled to an Agilent 6550 quadrupole – time-of-flight (Q-ToF) mass spectrometer with electrospray ionization (Agilent, Santa Clara, CA). The LC column used was an Agilent Zorbax Extend C-18, 2.1 x 50mm and 1.8 $\mu$ m

particle size. The LC buffers were Solvent A - 0.1% formic acid in water and Solvent B - 0.1% formic acid in acetonitrile (v/v). The gradient elution method is detailed in Table S11. Quantitation was based on the LC retention times of standards (Fig. S26-27) and the area of accurately measured diagnostic precursor or fragment ion for each targeted peptide. The protonated molecules of each peptide,  $[M+2H]^{2+}$ , were targeted and subjected to collision induced dissociation, with product ions accumulated throughout the targeted period. Standard solutions of GluFib B were prepared using [Glu1]-Fibrinopeptide B Standard (Waters, Milford, MS) and analysed by targeted LC-MS/MS. The resulting calibration curve was then used to determine the concentration of the GluFib B released from a digested QconCAT stock solution. This value was then used for the QconCAT solutions to generate calibration curves for target peptides, which were in turn used to measure the concentration of peptides in the digested sample solutions. Concentrations of peptides were calculated using the integrated area of the peak corresponding to the elution of the peptide of interest at the retention of the standards. This was measured from either the response for the precursor ion or for a fragment ion from the product ion spectrum of each peptide. Calibration curves generated from the standards using the same data type were used to calculate concentrations, with normalisation using the respective internal standard peptide response. Additional quantitative measurements were made by using the internal standard as a single calibration point to calculate the concentration of target peptides in the samples.

#### *Semi-automated cell-free screening of RBS library parts*

For clarity, elements of this workflow used both manual and automated steps (i.e. semi-automated), which we feel is appropriate for any standard molecular biology laboratory to perform even without liquid handling capability.

#### *Library construction*

To ensure high-yields of DNA from 96-well purification, the backbone of the positive control plasmid (PDH-RiboJ-GFP-MGapt-Bba\_B0015) was modified to include a pUC19 origin of replication, using Golden Gate assembly. The plasmid also included the *B. megaterium* shuttle vector parts RebB and TetA for *in vivo* experiments. Inverse PCR primers were designed to amplify the plasmid (6884 - 6889 bp) using Q5 polymerase (NEB). The spacer region (WWW) was varied from three to eight W nucleotides to provide the RBS-3, -4, -5, -6, -7 and -8 libraries.

#### RBS library primer(s)

5' AGGTCTCAATCARRRRRRRWWWATGACTAGTTCTGAAGATCTGGGCTAG 3'

#### Reverse primer

5' AGGTCTCTTGATTTAAGTGAACAAGTTTAAACAAAATTATTTGTAGAGG 3'

#### *Ligation*

100 ng of purified PCR product was then digested and ligated in a one-pot reaction using a standard EcoFlex Level 1 15  $\mu$ L reaction. 0.5  $\mu$ L of DpnI was also added to remove any residual template DNA. 2  $\mu$ L of EcoFlex mix was

transformed into 25  $\mu\text{L}$  of competent *E. coli* cells, plated onto carbenicillin plates and grown at 37°C overnight.

#### *96-well DNA purification*

For the RBS libraries, single colonies were cultured in 1.2 mL of Terrific Broth (Merck) with 100  $\mu\text{g mL}^{-1}$  carbenicillin in a 2 mL deep-well plate (Greiner) for 16 hours shaking at 37°C, 300 rpm with a Breathe-Easy® (Sigma) seal. For each library, 88 clones were picked, along with 4 positive and 4 negative control colonies to complete a 96-well plate. Plasmid DNA was purified with a PureLink® Pro Quick96 Plasmid Purification Kit (Invitrogen) as outlined by the manufacturer's guidelines. Modifications to the protocol were made as follows. After resuspension of cells in 250  $\mu\text{L}$  of A1 buffer, to minimise time during the alkaline lysis step, addition of the alkaline lysis buffer (250  $\mu\text{L}$  of A2 buffer) was carried out with a multi-channel dispenser. The plate was then immediately sealed with an aluminium plate seal (ThermoFisher), before inverting four times slowly to mix. The plate was then briefly centrifuged at 500 x *g* for 20 seconds to ensure that upon removal of the seal, no cross contamination between wells occurred. This procedure of plate sealing, plate inversion and brief centrifugation was also repeated for the following neutralisation step (350  $\mu\text{L}$  of Buffer A3). Finally, after following the recommended wash steps, the plate was centrifuged at 4000 x *g* for 15 min at room temperature to ensure full removal of ethanol. DNA was eluted with 50  $\mu\text{L}$  of elution buffer. Plate DNA concentrations were quantified with PicoGreen™ assay (ThermoFisher) (Fig. S38).

#### *Low-volume cell-free screening reactions*

Cell-free reactions were set-up as follows. 4  $\mu\text{L}$  of 88 clones, 4 positive controls and 4 negative controls were dispensed into a low dead volume (2  $\mu\text{L}$ ) 384 well COC Source Microplate (Labcyte). 576  $\mu\text{L}$  of cell-free reaction mix was warmed to room-temperature and transferred to a 6-well source plate (Labcyte), with 200  $\mu\text{L}$  dead-volume. 0.5  $\mu\text{L}$  of plasmid DNA was then randomly dispensed with a Echo® 550 liquid handling robot (Labcyte) as four replicates into a 384 well Small Volume™ LoBase Microplate (Greiner). Plate randomisation was prepared using the Echo® Cherry Pick software (Labcyte) to minimise time-differences between wells. Reactions were started with the addition of 1.5  $\mu\text{L}$  of cell-free reagent into each well using the Echo® 525 liquid handling robot (Labcyte). The plate was then briefly centrifuged, sealed with an aluminium plate seal (ThermoFisher). Plates were then measured on a Synergy™ 2 (BioTek) plate reader and incubated for 5 hours (end-point) at 30°C. GFP fluorescence was measured every 15 mins with the following settings: excitation 488 nm, emission of 525 nm and a gain of 85.

## Supplementary Text - Extended Results

### *Optimisation of a B. megaterium DSM319 cell-free extract*

Following the protocol of Sun *et al* describing preparation of a *E. coli* cell-free extract (18), a modified protocol for cell-free protein synthesis using the wild-type *B. megaterium* DSM319 strain was developed. For initial extract optimisation steps, a 0.33 volume of extract (~10 mg mL<sup>-1</sup>) was incubated with 5 nM of pRBBm258 plasmid, 1 × 3-PGA energy buffer, 1 × amino acid mix, 6 mM Mg-glutamate, 50 mM K-glutamate and 2% (w/v) PEG8K in a technical triplicate repeat.

Extracts were prepared through four stages of preparation – growth, cell-disruption, incubation at a controlled temperature (“run-off” period) and dialysis. Following the S30 method with minor modifications the cells were lysed with sonication followed by a 1.5 hour “run-off” period at 37°C and a 3 hour dialysis. From this, significant levels of GFP synthesis (1.4  $\mu$ M) were detected with 10 mg mL<sup>-1</sup> of protein extract incubated with 10 nM of plasmid DNA, 1.5 mM amino acids and a 3-PGA energy buffer system over 4 hours. To optimise the method further, the sonication, “run-off” and dialysis stages of extract preparation were individually tested. Maximum activity was observed with an energy input of 154 kJ mL<sup>-1</sup> for sonication and a “run-off” period of 1 hour at 37°C. These two modifications increased GFP batch synthesis up to 2.8  $\mu$ M (Fig. S5). Further details of optimisation are outlined in the text. As a third preparation step for cell-free extracts, dialysis is used to remove small molecules. However, it was found that dialysis was not always essential for the preparation of all *E. coli* cell-free extracts (19, 20). For *B. megaterium* DSM319, dialysis was not essential to improving cell-extract activity (Fig. S5). With further optimisation of Mg-glutamate (2 mM) and K-glutamate buffer (50 mM) conditions with 3-PGA as the energy source, maximum levels of 4.96  $\mu$ M GFP was produced at 30°C from 10 nM pRBBm258 PDH constitutive plasmid, with a band corresponding to GFP observable on SDS-PAGE (Fig. S1). This represented a 3.5-fold improvement over the initial test condition.

### *Optimisation of B. megaterium DSM319 cell-free buffer conditions*

**Mg-glutamate and K-glutamate buffer optimisation:** The Mg- and K-glutamate buffer was tested as a two-dimensional grid using the Echo liquid handling robot. Mg-glutamate showed the greatest effect on cell-free protein synthesis activity peaking at 6 mM. With no added Mg-glutamate, only trace levels of GFP were detected. K-glutamate up to 50 mM showed only a slight increase in GFP synthesis, whilst between 50 and 200 mM, a gradual decline in activity was observed (Fig. S5).

**Molecular crowding agents:** For molecular crowding, the PEG concentration was varied from 0-4% (w/v) and PEG sizes 2K, 4K, 6K, 8K and 10K were tested. Significant activity was detected in the absence of PEG in comparison to the control condition containing 2% (w/v) PEG 8K (Fig. S5).

### *Energy buffer*

**3-PGA energy buffer:** The reaction buffer of Sun *et al* (18) was kept constant throughout the preliminary testing and for prototyping of gene expression tools.

The buffer consisted of a 14 × stock of energy solution containing 700 mM HEPES pH 8, 21 mM ATP, 21 mM GTP, 12.6 mM CTP, 12.6 mM UTP, 2.8 mg mL<sup>-1</sup> *E. coli* tRNA, 3.64 mM coenzyme A, 4.62 mM NAD, 10.5 mM cyclic AMP, 0.95 mM folinic acid, 14 mM spermidine and 420 mM 3-PGA. Aliquots were stored at -80°C.

#### *Testing of the xylose-repressor system in an extract with minimal native XylR interference*

Expression of the *xyl* operon is repressed from the divergently transcribed repressor XylR. In the absence of xylose, XylR binds to the operator sequence to provide tight transcriptional gene expression control. Xylose binding to XylR releases the protein to allow transcription to start with gene expression induced up to 350-fold in *B. megaterium* DSM319, thus acting as a sensing mechanism for the cell to switch metabolism and utilise xylose as a carbon source (21). To study this system in cell-free reactions, we used a xylose-promoter reporter plasmid lacking the XylR regulator (pKMMBm5). Previously, this plasmid was shown to constitutively produce GFP at similar levels in wild-type *B. megaterium* DSM319 and WH325  $\Delta$ *xylR* mutant strains (2). This suggested that under standard growth conditions, the levels of XylR produced from the genomic copy of the gene were insufficient to repress  $P_{xyl}$  controlled GFP expression from the medium copy plasmid pKMMBm5 (2). In addition, with the pKMMB5 plasmid, DSM319 extracts did not show any changes in GFP expression with the addition xylose (Fig. 3, *SI Appendix*, Fig. S28). This suggests that the level of XylR in the extract is below the limit of detection. We were also unable to detect peptides derived from XylR in trypsin-digested cell-extracts, which we performed to inform the design of the synthetic QconCAT peptide. Therefore, we suggest our experiments were performed with minimal interference from endogenous XylR. In addition, prior to further testing, we also verified that the cell-free reaction is not inhibited by high D-xylose concentrations or buffer components (NaCl, glycerol) derived from XylR purification and storage (*SI Appendix*, Fig. S28).

#### *Cell-free GFP and mCherry production at different temperatures*

Plasmids with the PDH promoter controlling GFP (pRBBm258) and mCherry (pRBBm267) genes were tested at different temperature-controlled incubations of 25°C, 30°C and 37°C. The highest level of mCherry protein production was 0.17  $\mu$ M at 25°C, which decreased further with increasing temperature, whereas GFP levels were found to be optimum at 30°C (Fig. S6).

#### *Codon optimised mCherry synthesis*

The genome of *B. megaterium* DSM319 has a low G+C content of 38%. This is also reflected by the presence of the rare codons for Arg (CGG), Ala (GCC) and Thr (ACC), which were identified by “tRNAscan-SE” (22). The presence of these rare codons in the iGEM derived mCherry gene is relatively high (62% G+C) with a low codon adaption index score of 0.15. To test this, a *B. megaterium* codon-optimised mCherry variant (31% G+C) was tested in comparison, along with an additional high G+C (%) variant codon optimised for *Streptomyces* (64% G+C) expression. These variants were assembled into pTU1-A with the *pdh* promoter, RiboJ-RBS and Bba\_B0015 terminator. 10 nM of plasmid was added in a standard NCF reaction and incubated at 30°C for 6 hours. The *B. megaterium* optimised mCherry produced the highest levels at 0.37  $\mu$ M, whilst



the iGEM (0.019  $\mu\text{M}$ ) and *Streptomyces* (0.009  $\mu\text{M}$ ) produced only trace levels of mCherry (Fig. S7). In the absence of *E. coli* tRNA an 8-24% decrease in mCherry synthesis was observed between the three variants (Fig. S7). This suggests that genes codon optimised towards low G+C (%) content are more favourably synthesised in *B. megaterium*, and that the cell-extracts contain sufficient levels of native tRNA.

#### *Bayesian modelling of energy consumption and efficiency in the NCF system*

The total theoretical energy potentially available to the system based on the initial NTP and the 3-PGA secondary energy source concentrations (and ignoring metabolism of the amino acids) was estimated by assuming that 1 mol 3-PGA molecule yields 13.5 mols high energy phosphate bond equivalents through complete oxidative phosphorylation (23). The final reaction mix contains 4.8 mM of NTPs and 30 mM 3-PGA, giving a maximum of 414.6 mM of high-energy phosphate bond equivalents. Rather than directly using these values in the model we have inferred the initial concentrations of NTPs and of the 3-PGA secondary energy source (in units of NTP  $\rightarrow$  NMP equivalents). This is because it is highly likely that the 3-PGA is not fully metabolised in the cell-free reaction and we wish to estimate the proportion of the theoretical energy that is accessible to the system in practice. The initial NTP concentration for these reactions was inferred to be 4.3-5.8 mM (95% confidence interval, median 5.1 mM), the initial 3-PGA concentration (in terms of NTP equivalents, i.e. two high energy phosphate bond equivalents) was inferred to be 7.9-9.7 mM (*SI Appendix*, Table S9-10), and the summed total accessible concentration of high energy phosphate bonds available to the reaction from both of these sources was 24.8–30.4 mM. This suggests that around 6-7% of the total theoretical energy input was accessible to the system in practice, and around 4-5% of the possible theoretical energy from complete oxidation of 3-PGA was used to recycle NTPs. The fraction of the total accessible energy used for protein synthesis depends on the promoter concentration and strength, and the RBS strength. Lower concentrations of promoter result in lower final protein concentrations as well as a lower protein accumulation rate because a larger fraction of the total energy is diverted to competing non-productive NTPase side-reactions. Taking the most productive condition in this experiment (40 nM *pdh*-RiboJ-GFP-MGapt and 0 nM *pdh*-RiboJ-mCherry plasmid concentrations), the model predicts that 12-15% of the total available energy was used for transcription, 9-11% was used for translation and 74-79% was wasted in non-productive NTPase side reactions. Therefore, of the maximum total theoretical energy (414.6 mM) available, only 0.64-0.66% of this was directed to protein translation. The model suggests that improving the metabolism of the secondary energy source would substantially increase the overall protein yield but increasing the concentration of NTPs would not have much effect (*SI Appendix*, Fig. S36). This is because NTPs were inferred to have a half-life of around 8.7-9.7 minutes (before being consumed in non-productive NTPase side-reactions), so increasing the NTP concentration just increases the rate at which the secondary energy source is used to regenerate NTPs that are then wasted in non-productive side-reactions.

### *Inactivity of the pyk and tpi constitutive promoters*

The *pyk* promoter controls the pyruvate kinase (BMD\_1526) gene, whilst *tpi* drives a three-gene operon encoding the glycolysis enzymes triosephosphate isomerase, phosphoglycerate mutase and enolase. In a separate preliminary data collection (described under LC-MS/MS analysis section), LC-MS/MS analysis of trypsin-digested cell-extracts identified the presence of eight distinct peptides for the triosephosphate isomerase (BMD\_5036), but not the pyruvate kinase (BMD\_1526). Three distinct peptides of an alternative genomic copy of the pyruvate kinase (BMD\_4760) was detected by LC-MS/MS, suggesting that the *pyk* promoter we isolated upstream of *bmd\_1526* is redundant under the conditions tested. In addition, for the *tpi* promoter, considering that the growth conditions used (rich media) for both promoter testing and cell-extract preparation is identical, the presence of the triosephosphate isomerase protein in the extracts suggests that the upstream promoter is active. Considering we isolated and characterise the entire intergenic region for all of the promoters, we can only speculate that under the test conditions, the *tpi* promoter is controlled by an unknown regulatory loop, or the removal of the native RBS has negatively affected promoter activity.

### *Effect of NaCl, glycerol and xylose on cell-free activity*

To maintain stability of XylR, the purification of His<sub>6</sub>-tagged *B. megaterium* XylR requires a high NaCl concentration (400 mM) and 15% (v/v) glycerol to maintain solubility and storage at -80°C, respectively. For testing the xylose promoter activity in cell-free, the additives NaCl, glycerol and xylose were tested for their effect on cell-free activity, using 2.5 nM of pRBBm258 under standard conditions. This testing showed D-xylose did not have any effect on cell-free protein synthesis activity above 1 mM, which is the maximum used for the xylose promoter activity in cell-free. As glycerol did inhibit cell-free protein synthesis activity, we chose to freshly purify XylR for each experiment without glycerol. XylR could not be stabilised by alternative buffering components, so a high-salt concentration of 400 mM NaCl was essential for purification and stability. However, we concentrated XylR up to 60 µM and diluted to a maximum concentration of 1 µM XylR in cell-free reactions. The maximum diluted NaCl concentration is 6.67 mM, which is sufficient to avoid inhibition effects by high-salt concentrations. A summary of these findings is in Fig. S28.

## DNA parts used in this study and assembled with EcoFlex

All DNA parts were cloned as described by EcoFlex assembly method (4). The *bmd\_4746* (*gapdh*) promoter, RiboJ insulator (24), QconCAT\_Bm\_NCF sequences were synthesised by Integrated DNA Technologies (IDT), USA. The *B. megaterium* codon optimised mCherry variant was synthesised by Life Technologies™ Genearth™ (Regensburg, Germany).

The EcoFlex Level 1 assembly format was modified to standardise and characterise the *B. megaterium* promoter parts. Golden Gate BsaI overhang order of assembly is shown in highlight below. Parts were assembled with EcoFlex (4) into the destination vector pTU1-A-*lacZ*.

|           |                                                                |
|-----------|----------------------------------------------------------------|
| CTAT-GTAC | Promoter                                                       |
| GTAC-CATA | RiboJ-RBS - modified from Lou <i>et al</i> (24) to include RBS |
| CATA-TCGA | GFP-MGapt-Bba_B0015                                            |
| TCGA-TGTT | TetA-RebB shuttle vector part                                  |

### *B. megaterium* DSM319 putative Sigma A promoters

The entire intergenic sequence from the upstream gene or operon was amplified. The native RBS site was removed, by eliminating the putative RBS site along with any preceding G nucleotides. The removed sequence of the putative RBS is listed beneath each gene, along with the start codon (coloured red). Flanking BsaI sites and overhangs are highlighted. Partial sequence alignment to a consensus Sigma A box (<sup>35</sup>TTGACA and <sup>-10</sup>TATAAT) is highlighted in green. We list these as putative Sigma A promoters.

#### *Hexokinase (BMD\_0536)*

GGTCTCTCTATAAAATGAGGCTGAGACAAAAGTATTTTAGCCTAAGTGAAAAACGAGCCATT  
GATCAAAATGTTTGATTCATGGTTCGTTTTTTTATTATGGTGAACGTAGGTTTCATCCGTTTT  
GTTCTTCTAGCAGCTGCATGGAAATCAACAGCGGGGTCACAAGCTATTCATACGAGCTAA  
TGCATCCATTTGTTTCGCTTTTCGACTGATTTATTTCTTTATGTCTCAACCTCATTTT TGAAT  
TTTTAATAATGTTTATTATAATAAAAAACAGGGAAACTAATTGCCTAATGTACAGAGACC

Native RBS - GAAGAGAGAGAAAGGGTTGTTTTAACGTATG

#### *Phosphoglucose isomerase (BMD\_4923)*

GGTCTCTCTATACGCTGGAATTTCTATACAGAAGCGGGACAAAAAGGCTAATAAAAAAG  
GCGATAAAATCACCAAGTGCAACCACGACAAAAGACAAACCTCCTTGATATTCAATTCTG  
TAACCGATTATATAATAATTTAATTATGCATGCATCCATGCTAATTCTTAGTATCAGCAGAATT  
TTCAAGGCTTATTAATAAATAGAACTCGTCACAAAATCCATAAAAAAACATAAAAAAATTT  
TTTTCGACGTATAAAATCATGCGAAATTGTCACTCTAAGATTGAGGTGATGGAAATGTATA  
GGAAACAAATAGCCATCAGTTTTCTCATTCTTACCGCACTATGTATGAGTGGATTTGTGCTG  
AATAATCACTTGAAATGAAAGAAGAAAACAGGATGCTGCTTACTTCTAAAAACGAAGCTGA  
AAATCCATATCAATAGACTCTTCCCTGTAAAAGCCTCTTATAAACCGAGACAATATGTAAA  
GATAGGTGAAATGAACTATATTGCACCATCCGGTAAGCAAATAAAAAACGATTGAAGACCAC  
TC TTAGTCGTTTTTTATTTGCTTATTATTGTTGTGTAATCTTGCATGAATTACGTTCTATAATCG  
AAGAACATTAGTTGACTTCATAACTGAATTTATCGTTAAATAAAAGGGTACATACAATGATTG  
CAGTTTCAACAACTATAATGATTGTGTCAAACGTAAGTGGATTCACTTGAATTCAGTTAAC  
AGTTTCGATAAAGTGAAAAATAAAGATATTTAATGTACAGAGACC

Native RBS – GGAGGAACAGACTATG

*Phosphofructokinase (BMD\_3400)*

GGTCTCTCTATGTTCCACAAATCACTACATTTCGTACGAACACTCTGCAATAATTCACITTTTAGG  
TTGGAGTGTAGAGATAAGAAAAGCAGCGTGATGTTTTACATCCGCTGCTTTTTTATATCGTA  
AAATTTATTTAGTACAAGGCGCCCGTTGTATAGCTAAATTGCTTAGGGGGCGGGTTTTAAAC  
CGGATATACTGAAATAGTGAACGGTCAGAATTAGGGTGGATAAGGTATCAGCAGACATTA  
ATGTGATGATTTTCCCTCGATTTTTCTCTTCATCTAACAAATCCAACAGAAAAATCTCTGAA  
CATAAAAGAACAGAGATTCAACAGAATGATGATTCTTATATAATAACAAAGGATGACTTTTCCT  
GTCTCAGAAAGGTCATTTTTATTGTAACACCAGCAAAGTCTTAACGCTGTGAGATATCTCAC  
AGCTAGGGAAGAAAAACCTGCTATTATATAGAGGTCCGAGTAACTTTCTTAATTATGTGC  
GCTTCTTTTCATATGTATCGAACCTGTTGACTGAGATCAGCAGGTTTTTTTATGTIACCAGCTA  
GCTGTCATCTTTAAAGGGGCAAGATCGTTTAATCTTTATAAACAATAGACTTTTATACCATTT  
TACCTATACGTAATAATAGGTTAAAATAAAGGGGTGAGGCGTGGAGAGAAAAGAGTTAAATAA  
GAGGTGCGTTACATTATGATCACATTTATCTTACAAGGTTATAACGGTGATTATACTAAATG  
GTGAACGTTGAAAAGTACAGAGACC

Native RBS – GGGGATACATAGTTATG

*Fructose biphosphate aldolase (BMD\_5161)*

GGTCTCTCTATGGTTTTGGTAGGGTTTTTCATCCTAACAAATTTTGAATATCAGCCTAAAAATG  
TTGCTGTTTTATTGTTAGTTGGTATCCTAATTACTGTATTCATAATTCGACAATCTATTATGT  
AAAGATGCGCGTTGTTTCTACATGAAACACTCAATTCAGAGCATACTATTTGAGTGTGCCT  
TTTGTTAGCATCTAATCTAAGGTTGATTTTAAAGTACAGAGACC

Native RBS – GGAGGATTTCAATATG

*Triosephosphate isomerase (BMD\_5036) – shared operon with  
phosphoglycerate mutase (BMD\_5034) and enolase (BMD\_5035)*

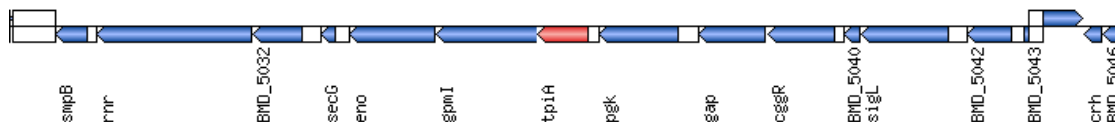

Graphic from <http://megabac.tu-bs.de/index.php>

GGTCTCTCTATGTTTATGTTTCAGTAAGACGGAGGACCGGCCTGACGACTGATAATATAAGA  
AACTATCAAGCAGCGAAGAAGGGTGACCAAGAGATAAAAAGGGACCGAATCACTTTTAAACAG  
CACCTCTTGGACA TCTAACGCGTGAAGGGAAAACC CACAAT AAACAAAAGTACAGAGACC

Native RBS – GGACGGTGTTATACATGCGTATG

*Glyceraldehyde phosphate dehydrogenase (BMD\_4746)*

GGTCTCTCTATAGAGTGAATGATTGCATTCCTTTTTTTATTGGGAATATTTAAGGGCTTC  
TAAAAAAGAATGTGTTAAATATCTGTTCTCGCTATATACATATAGTAAACTTAAATTAATAA

TTTATTAATAAAAAATTAATATATTCACTTTTTAAATATTTATGTTATACTATTCAATATAAAAA  
GTAAATAGTATAACACATATAGTACAGAGACC

Native RBS – GAGAGGGGTATAGCCATG

*Phosphoglycerate kinase (BMD\_5037)*

GGTCTCTCTATGAATAACTTAAAATTCGCTTCTATTTTATTCAATAAGACAGAAATCGACTAG  
ACTTTCCTTTTTTATTGGATATCTGAAAATAGAACGACTATAATAAGACTTGCTAAGGAAGAG  
AGGGGCATACCCCCTTTCCTTGATTTATGTATTGGCTTCTACATGAAAAAGCGTCATAAGC  
AGCTAGCTGGAGTTTCACITTTATATAGAAAGGCGCCAATATAAAAAATGAAATCTACGGTGG  
TTTGTGGATTGATGATTACATAGAAGCCTACTTGCTTAGTACCATAAATACTTAAAGTACAGAG  
ACC

Native RBS – GGAGGCCTTTTAACGATG

*Pyruvate kinase (BMD\_1526)*

GGTCTCTCTATAAAAGGGCTGTCTCTTAGGCAAGTTATTGACTAAGAGGCATCTTTITGTG  
ITGGTATACCTATTTTTGTATAAAGCTTATCTCTTTTATGAAAATGGGCATCCTACATTAAG  
TACAGAGACC

Native RBS – GGATGGTGAAAGGCAATG

*Pyruvate dehydrogenase (BMD\_1326)*

GGTCTCTCTATGAAGGCCTGTGAAGTTACAGGTCTTTTTTTGGCTGAAAAGGAAGGTTTT  
CTGAAATAAAGAAAGAGTTTCGACATGATTCACGTAATAAATTACAAAAGGTTATTGTTTTAAA  
AAATCGTTTATTTGTGGCAAGATAGGAGATGTGCAGACGTAAAAAAGAAAAGGTTATTATA  
AAACATATAATACAGTTTGCCTGTGTAAATAGTACAGCATGTCTTTTTTATGTGTTTTATTC  
ACAAACTAAAAAAGCGTAATTTCTTGATGTAATGCATTGACGAACTGTTTTAGTGATTGTA  
AACTAGGTAGCGTAGTAAGTGTGTTGTTAATCATTTTTGCAAATAATTAATACAGTTTAACG  
AAACGTTTCGTTTCGCTTAAACTTTCCTTTTACGTAAATGTTTGCACAGAATTCGCTGGGGAAT  
ACATAGAAATGTTAAGGATTAGCGAATTCAAAAGCTACTCGACAAAATATGACTTTTACTTG  
TCCATTTGGGACATTCTAAAAGCGTGTATGTTGTTGATTAGTAAAATGAATTTATACGGCT  
TAAATGAAAAGTACAGAGACC

Native RBS – GGAAGAGGTGACTTAGATG

*Promoter linker (PL) – used for negative control experiments for comparing activity of Sigma A constitutive promoter plasmids*

GGTCTCTCTATTATATAGTACAGAGACC

## Other DNA parts

Non-coding parts were cloned with either NdeI and SphI, or BsaI into pBP-*lacZ*. ORFs were cloned with BsaI or NdeI and BamHI into pBP-ORF-*lacZ*. Restriction sites are highlighted. Start and stop codons are coloured red. The MGapt sequence is highlighted in dark green.

*pBP-ORF-lacZ* – Modified from pBP-ORF (4) for blue/white screening

GGTCTC **ACAT** **ATG**TTGTGAGCGGATAACAATTTACACAGGAAACAGCTATGACCATGGTAA  
CAAAGAGGAGAAAGGACATGGGTGACCCGAAACTGCTGCTGGAAGTTCCGCACGCTATCT  
CTTCTTCTCCGGTAACCTCTGCTGTTGTTCTGCAACGTCGTGACTGGGAAAACCCGGG  
TGTTACCCAGCTGAACCGTCTGGCTGCTCACCCGCCGTTTCGCTTCTTGGCGTAACTCTGAA  
GAAGCTCGTACCGACCGTCCGTCACAGCTGCGTTCTCTGATCCGTCTGCTGACCAA  
CCGGAACGTAACCTGTCTGGCTGCTGCCGCCGCTGTCTAACTAACGCAAAAAACCC  
GCCCTGACAGGGCGGGGTTTTTCGCACTAGT **GGATCC** **TCGA** **AGAGACC**

*RiboJ-RBS* - derived from Lou *et al* (24)

GGTCTC **GTAC**AGCTGTCACCGATGTGCTTCCGGTCTGATGAGTCCGTGAGGACGAAAC  
AGCCTCTACAATAATTTGTTAACTTGTCACTTAAATCAAGGAGGTGAATGT **CATAAGA**  
**GACC**

*GFP-MGapt-Bba\_B0015* – (*malachite green aptamer highlighted in dark green*)

GGTCTC **ACAT** **ATG**ACTAGTTCGAAGATCTGGGCTAGCAAAGGAGAAGAACTTTTCACTGGA  
GTTGTCCCAATTCTTGTGAATTAGATGGTGATGTTAATGGGCACAAATTTTCTGTCACTGG  
AGAGGGTGAAGGTGATGCTACATACGGAAAGCTTACCCTTAAATTTATTTGCACTACTGGAA  
AACTACCTGTTCCATGGCCAACACTTGTCACTACTTTGACCTATGGTGTTCAATGCTTTTCC  
CGTTATCCGGATCATATGAAACGGCATGACTTTTTCAAGAGTGCCATGCCCGAAGGTTATGT  
ACAGGAACGCACTATATCTTTCAAAGATGACGGGAACACTACAAGACGCGTGCTGAAGTCAAG  
TTTGAAGGTGATACCCTTGTTAATCGTATCGAGTTAAAAGGTATTGATTTAAAGAAGATGGA  
AACATTCTCGGACACAACTCGAGTACAATACTCACACAATGTATACATCACGGCAGA  
CAAACAAAAGAATGGAATCAAAGCTAACTTCAAATTCGCCACAACATTGAAGATGGATCCG  
TTCAACTAGCAGACCATTATCAACAAAATACTCCAATTGGCGATGGCCCTGTCTTTTACCA  
GACAACCATTACCTGTCGACACAATCTGCCTTTTCGAAAGATCCCAACGAAAAGCGTGACC  
ACATGGTCTTCTTGAGTTTGTAACTGCTGCTGGGATTACACATGGCATGGATGAGCCCTA  
CAAAT**TA**TGAATTCGCGGCCGCATGCTCGATATAGCAATAC **GGATCCCGACTGGCGAGAGC**  
**CAGGTAACGAATGGATCC**CCAGGCATCAAATAAAACGAAAGGCTCAGTCGAAAGACTGGG  
CCTTTCGTTTTATCTGTTGTTTGTGCGGTGAACGCTCTCTACTAGAGTCACACTGGCTCACCT  
TCGGGTGGGCCTTCTGCGTTTATATGTTACCGGTCCAAG **TCGA** **AGAGACC**

*B. megaterium* DSM319 Sigma A factor – *rpoD*

GGTCTC **ACAT** **ATG**GGCTGAAAAATCAGCTCAATCAAAACAACCTTGATTCAGATTTAACAATTGA  
ACAAGTAAAAGATCAATTGACCGAAATCGGAAAAAACGTGGTGTGCTCACATACGAAGAA  
ATTGCAGAGCGTATGGCAAACCTCGAAATTGAATCCGATCAAATGGATGAATATTATGAATA  
CCTTGGAGAACAAGGTGTTGAAGTAATGAGTGAATCTGAAGCAAATGATGACGATGCCGAT  
CCCGATATTCAAGAACTGTCAAAAGAAGAAGAGTTTGATTTAAATGATTTAAGTGTACCTCCT  
GGTGTGAAAATTAATGATCCAGTTCGTATGTACTTAAAAGAAATCGGACGCGTTGACCTATT  
GTCGGCAGAGGAAGAAATCAATTTAGCAAACGATTGAAGAAGGCGATGAAGAAGCGAAA  
CGTCGTCTTGCTGAAGCAAACCTTACGTCTTGTGTAAGTATCGCTAAACGCTATGTCGGGC  
GCGGTATGCTGTTTCTTGATTTAATTCAAGAAGGAAACATGGGTCTTATTAAGCGGTAGAA  
AAATTTGATTATCGCAAAGGTTATAAATTCAGTACGTATGCGACATGGTGGATTCTGCAAGC  
TATTACTCGTGCAATTGCTGACCAAGCAAGAACGATTCTGATTCCCGTTCATATGGTTGAAA

CGATTAACAAGCTAATTCGTGTTCAACGTCAGCTTCTACAAGATTTAGGTCGTGAACCATCT  
CCTGAAGAAATTGCAGAAGATATGGACTTAACACCAGAAAAAGTTTCGTGAAATCTTAAAAAT  
TGCTCAAGAACCGGTTTCCCTTGAACACCAATTGGTGAGGAAGATGATTCGCATTTAGGT  
GACTTCATTGAAGACCAGGATGCAACATCACCTTCTGAACATGCTGCATATGAATTATAAA  
AGAGCAGTTAGAAGACGTCCTTGATACGTTAACAGATCGCGAAGAAAATGTTCTTAGACTCC  
GCTTTGGTCTGGACGATGGACGTACGCGTACGCTTGAAGAAGTAGGAAAAGTATTTGGCGT  
AACGCGTGAGCGTATTCGTCAAATTGAAGCTAAAGCGCTTCGTAAGCTTCGTCACCCTAGC  
CGAAGCAAACGTTTAAAAGATTTCTTAGAATAATCGAAGAGACC

### QconCAT\_Bm\_NCF

CACCATATGAAAGAAACCGCAGCAGCCAAATTTGAACGTCAGCACATGGATAGTCCGGATC  
TGGGCACCCTGGTTCGCGTGGTAGCATGGCAATTAGCGATCGTGAAGGTGTTAATGATAA  
CGAAGAAGGCTTTTTAGCGCACGCATTAGCGAATATGGTCTGCAACTGCAAGAAAAAGAA  
GCACTGGAAGTTAATAACTTTGTGCCGGATTATCTGACCGTTGATGCAGAAAAAGCATTGA  
TCTGGTTCAAGAACGTTGGCTGGTTAATTATGCACGTAGCGCAGGCACCAGCGCACAGGTT  
CTGGGTAAAGTTGCAACCATTGAATATGATCCGAATCGTGCACAGGATAATAGCATTGTTGT  
TCTGGAAGCACTGAGCTTTGATGCACCGAAAGGTGGTGGTGTGTTTTTGGTCCGGTTCCT  
CGTCTGGCAGAAACCCTGGTTGATCCGGAACCGGTGAAATTATTGCCGAAAAAGATATTC  
CGAATGTGGGTGAAGATGCACTGCGTGTGAAGGTCTGCTGGAAGAAATTCGTATTGTTAG  
CGAAAGCGGTATTGGTGCAGGCACCCGTGTTGCACAGGTTACCCAGGTTGAACCGGTTAA  
AGAAGTTCGTTTTGTTTCAGATGGTGTTTTTACACCGGAAGCATTGTGGAACGTCATCATC  
ACCACCATCACCATCATCATCACTAAGGATCCAC

### mCherry – codon optimised for *B. megaterium* (32% G+C)

CACCATATGATCTAAAGGTGAAGAAGATAATATGGCAATTATTAAGAATTTATGCGTTTT  
AAAGTACACATGGAAGGTTCTGTAAATGGTCATGAATTTGAAATTGAAGGTGAAGGTGAAG  
GTCGTCCTTATGAAGGTACACAAACAGCAAATTTAAAAGTAACAAAAGGTGGTCCATTACCA  
TTTGCATGGGATATTTTATCTCCACAATTCATGTATGGTTCTAAAGCGTATGTAAACATCCA  
GCAGATATTCAGATTATTTAAAATTATCTTTCCCTGAAGGTTTTAAATGGGAACGTGTAATG  
AATTTTGAAGATGGTGGTGTAGTAACAGTAACACAAGATTCTAGTTTACAAGATGGTGAATT  
TATTTATAAAGTAAAATTACGTGGTACAAATTTCCATCTGATGGTCCAGTAATGCAAAAAAA  
ACAATGGGTTGGGAAGCATCTTCTGAACGTATGTATCCTGAAGATGGTGCATTAAGGT  
GAAATTAACAACGTTTTAAAATTAAAAGATGGTGGTCAATTATGATGCAGAAGTAAAAACAACA  
TATAAAGCAAAAAAACAGTACAATTACCAGGTGCATATAATGTAATATTAATTAGATATT  
ACATCTCATAATGAAGATTATACAATTGTAGAACAATATGAACGTGCAGAAGGTGTCATTCC  
TACAGGTGGTATGGATGAATTATATAAATAAGGATCCAC

### mCherry – codon optimised for *Streptomyces* (64% G+C)

CACCATATGTTGTCCAAGGGCGAGGAGGACAACATGGCCATCATCAAGGAGTTCATGCGC  
TTCAAGGTCCACATGGAGGGCTCCGTCAACGGCCACGAGTTCGAGATCGAGGGCGAGGG  
CGAGGGCCGCCCGTACGAGGGCACCCAGACCGCCAAGCTGAAGGTCACCAAGGGCGGCC  
CGCTGCCGTTTCGCTGGACATCCTGTCCCCGCAGTTCATGTACGGCTCCAAGGCCTACG  
TCAAGCACCCGGCCGACATCCCGGACTACCTGAAGCTGTCTTCCCCGAGGGCTTCAAGT  
GGGAGCGCGTCATGAACTTCGAGGACGGCGGCGTCTGTCACCGTCACCCAGGACTCCTCC  
CTGCAGGACGGCGAGTTCATCTACAAGGTCAAGCTGCGCGGCACCAACTTCCCGTCCGAC  
GGCCCGGTCATGCAGAAGAAGACCATGGGCTGGGAGGCCTCGTCCGAGCGCATGTACCC  
CGAGGACGGCGCCCTGAAGGGCGAGATCAAGCAGCGCCTGAAGCTGAAGGACGGCGGCC  
ACTACGACGCCGAGGTCAAGACCACCTACAAGGCCAAGAAGCCGGTCCAGCTGCCGGGC  
GCCTACAACGTCAACATCAAGCTGGACATCACCTCCCACAACGAGGACTACACCATCGTCG  
AGCAGTACGAGCGCGCCGAGGGCCGCACTCCACCGGCGGCATGGACGAGCTGTACAAG  
TGAAGGATCCAC

*RepB-TetA shuttle backbone – originally derived from pWH1520*

A BsaI site located in the *repB* origin of replication was removed by silent mutagenesis by the method of Sawano *et al* (25). Mutagenesis oligonucleotide is listed in Table S3.

GGTCTCATCGACCACCTGACGTCTAAGAAACCATTATTATCATGACATTAACCTATAAAAATA  
GGCGTATCACGAGGCCCTTTTCGTCTTCAAGAATTCCTGTTATAAAAAAAGGATCAATTTTGA  
ACTCTCTCCCAAAGTTGATCCCTAACGATTTAGAAATCCCTTTGAGAATGTTTATATACATT  
CAAGGTAACCAGCCAACTAATGACAATGATTCCTGAAAAAGTAATAACAAATTACTATACA  
GATAAGTTGACTGATCAACTTCCATAGGTAACAACCTTTGATCAAGTAAGGGTATGGATAAT  
AAACCACCTACAATTGCAATACCTGTTCCCTCTGATAAAAAGCTGGTAAAGTTAAGCAAACCT  
CATTCCAGCACCAGCTTCCCTGCTGTTTCAAGCTACTTGAAACAATTGTTGATATAACTGTTTT  
GGTGAACGAAAGCCCACCTAAAACAAATACGATTATAATTGTCATGAACCATGATGTTGTTT  
CTAAAAGAAAGGAAGCAGTTAAAAGCTAACAGAAAGAAATGTAACCTCCGATGTTTAAACACG  
TATAAAGGACCTCTTCTATCAACAAGTATCCACCAATGTAGCCGAAAATAATGACACTCAT  
TGTTCCAGGGAAAATAATTACACTTCCGATTTTCGGCAGTACTTAGCTGGTGAACATCTTCA  
TCATATAAGGAACCATAGAGACAAACCCTGCTACTGTTCCAAATATAATTCCCCACAAAGA  
ACTCCAATCATAAAAGGTATATTTTTCCCTAATCCGGGATCAACAAAAGGATCTGTTACTTTC  
CTGATATGTTTTACAAATATCAGGAATGACAGCACGCTAACGATAAGAAAAGAAATGCTATA  
TGATGTTGTAACAACATAAAAAATACAATGCCTACAGACATTAGTATAATTCCTTTGATATC  
AAAATGACCTTTTATCCTTACTTCTTTCTTTAATAATTCATAAGAAACGGAACAGTGATAATT  
GTTATCATAGGAATGAGTAGAAGATAGGACCAATGAATATAATGGGCTATCATTCCACCAAT  
CGCTGGACCGACTCCTTCTCCCATGGCTACTATCGATCCAATAAGACCAAATGCTTTACCC  
CTATTTTCTTTTGAATATAGCGCGCAACTACAACCATTACGAGTGCTGGAAATGCAGCTGC  
ACCAGCCCCTTGAATAAACGAGCCATAATAAGTAAGGAAAAGAAAGAATGGCCAACAAC  
CCAATTACCGACCCGAAACAATTTATTATAATTCCAATAGGAGTAACCTTTTGATGCCTAAT  
TGATCAGATAGCTTTCCATATACAGCTGTTCCAATGGAAAAGGTTAACATAAAGGCTGTGTT  
CACCCAGTTTGTACTCGCAGGTGGTTTATTAATAATCATTGCAATATCAGGTAATGAGACGT  
TCAAAACCATTTTCAATTAATACGCTAAAAAAGATAAAATGCAAAGCCAAATTAATTTGGT  
TGTGTGTAATTCGATTGTGAATAGGATGTATTCACATTTACCCCTCCAATAATGAGGGCA  
GACGTAGTTTATAGGGTTAATGATACGCTTCCCTCTTTAATTGAACCCTGTTACATTCATTA  
CACTTCATAATTAATTCCTCCTAAACTTGATTAAAACATTTTACCACATATAAACTAAGTTTTA  
AATTCAGTATTTTCATCACTTATACAACAATATGGCCCGTTTGTGAACTACTCTTTAATAAAAT  
AATTTTTCCGTTCCCAATTCCACATTGCAATAATAGAAAATCCATCTTCATCGGCTTTTTTCGT  
CATCATCTGTATGAATCAAATCGCCTTCTTCTGTGTCATCAAGGTTTAATTTTTTATGTATTTT  
TTTTAACAAACCACCATAGGAGATTAACCTTTTACGGTGTAACCTTCTCCAAATCAGACAA  
ACGTTTTCAAATCTTTTTCTTCATCATCGGTCATAAAATCCGTATCCTTTACAGGATATTTTGC  
AGTTTCGTCAATTGCCGATTGTATATCCGATTTATATTTATTTTTTCGGTCGAATCATTGAACT  
TTTACATTTGGATCATAGTCTAATTTTCATTGCCTTTTTCCAAAATTGAATCCATTGTTTTGAT  
TCACGTAGTTTTCTGTATTCTTAAATAAGTTGGTTCCACACATACCAATACATGCATGTGCT  
GATTATAAGAATTATCTTTATTATTTATTGTCACTTCCGTTGCACGCATAAAACCAACAAGATT  
TTTATTAATTTTTTATATTGCATCATTTCGGCGAAATCCTTGAGCCATATCTGACAAACTCTTA  
TTTAATTCTTCGCCATCATAAACATTTTTAACTGTTAATGTGAGAAACAACCAACGAACTGTT  
GGCTTTTGTTAATAACTTCAGCAACAACCTTTTGTGACTGAATGCCATGTTTCATTGCTCTC  
CTCCAGTTGCACATTGGACAAAGCCTGGATTTACAAAACCACACTCGATACAACCTTTCTTTC  
GCCTGTTTCACGATTTTGTATACTCTAATATTTTCAGCACAATCTTTTACTCTTTCAGCCTTT  
TTAAATTCAAGAATATGCAGAAGTTCAAAGTAATCAACATTAGCGATTTTCTTTTCTCTCCAT  
GGTCTGACTTTTCCACTTTTTGTCTTGTCCACTAAAACCCTTGATTTTTTTCATCTGAATAAATG  
CTACTATTAGGACACATAATATTAAGAAACCCCATCTATTTAGTTATTTGTTTGGTCACT



TATAACTTTAACAGATGGGGTTTTCTGTGCAACCAATTTAAGGGTTTTCAATACTTTAAAA  
CACATACATACCAACACTTCAACGCACCTTTCAGCAACTAAAATAAAAATGACGTTATTTCTA  
TATGTATCAAGATAAGAAAGAACAAGTTCAAACCATCAAAAAAAGACACCTTTTCAGGTGC  
TTTTTTTATTTATAAACTCATTCCCTGATCTCGACTTCGTTCTTTTTTTACCTCTCGGTATG  
AGTTAGTTCAAATTCGTTCTTTTAGGTTCTAAATCGTGTTCCTTGGATTGTGCTGTTTA  
TCCTTACCTTGTCTACAAACCCCTAAAAACGTTTTTAAAGGCTTTTAAGCCGTCTGTACGT  
TCCTTAAGGAAGGTGTTAGAGACC

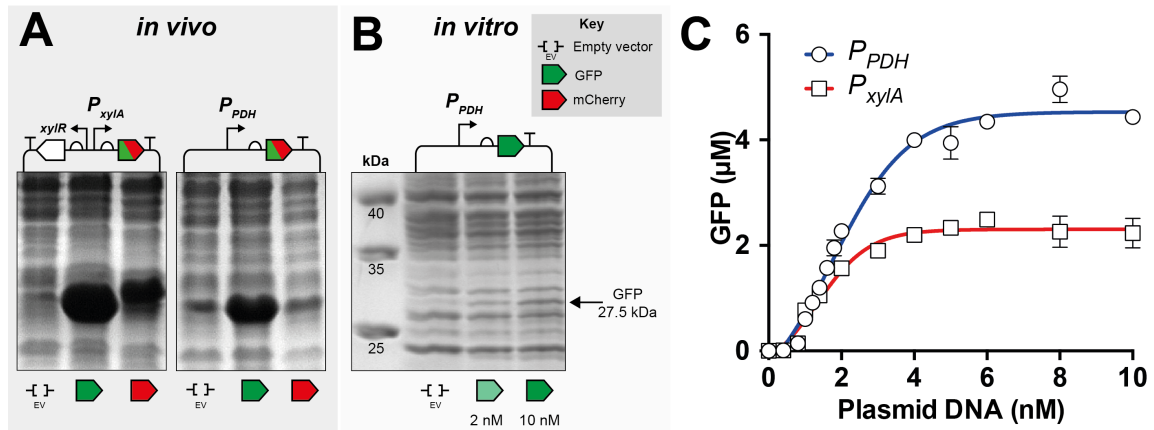

Fig. S1. Recombinant protein synthesis in *B. megaterium*. (A) SDS-PAGE of GFP (green arrow) and mCherry (red arrow) protein synthesised under the control of the xylose-inducible promoter or PDH constitutive promoter. An empty vector control (EV) – pMM1520, was used for comparison. (B) SDS-PAGE of NCF extracts of *B. megaterium* with GFP synthesised from the PDH promoter. (C) Time-course reaction of GFP synthesis from the xylose-inducible promoter and PDH constitutive promoter in NCF reactions with 10 nM of plasmid DNA. Error bars are representative of three technical repeats.

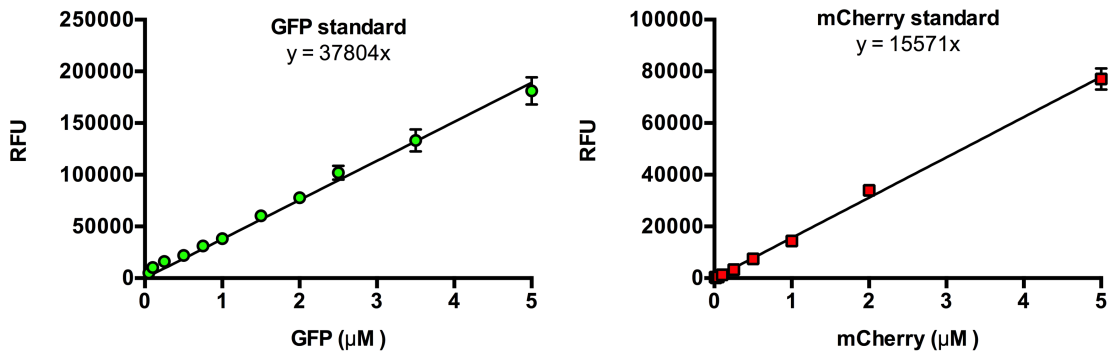

Fig. S2. Fluorescence calibration standards of purified His<sub>6</sub>-tagged GFP and mCherry. Purified proteins were mixed with 10 mg mL<sup>-1</sup> *B. megaterium* DSM319 extract, 3-PGA energy mix, amino acids, 6 mM Mg-glutamate, 50 mM K-glutamate and 2% PEG8K and pre-incubated at 30°C for 10 min.

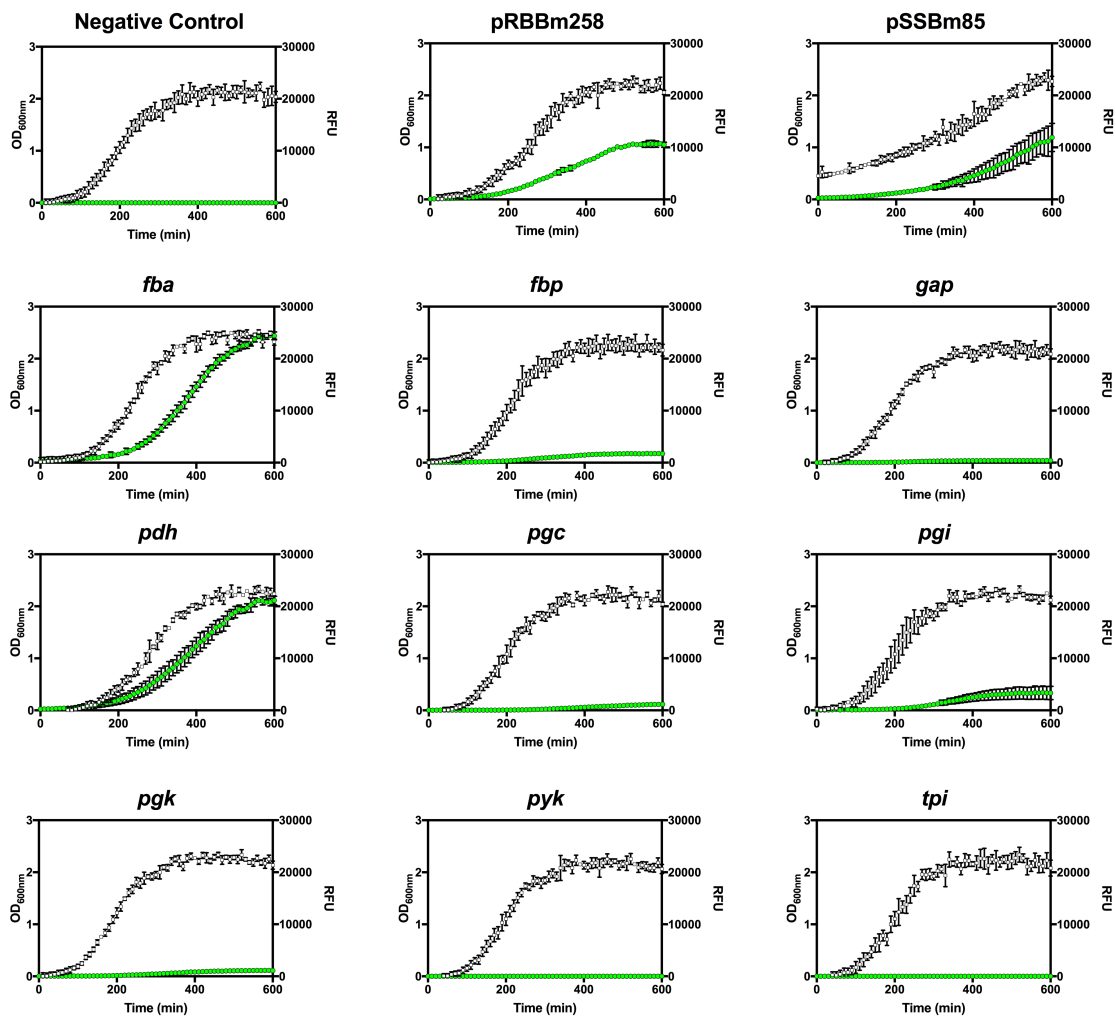

Fig. S3. Growth and GFP synthesis of promoter plasmid variants of *B. megaterium* DSM319 in 96-well plate cultures. Plasmid strains (controls, *fba*, *fbp*, *gap*, *pdh*, *pgc*, *pgi*, *pgk*, *pyk* and *tpi*) were grown as described in supporting materials and methods, then sub-cultured into fresh medium to an OD<sub>600</sub> of 0.02 and grown for 10 hours at 30°C and 600 rpm shaking. The pRBBm258 ( $P_{pdh}$ -GFP) and pSSBm85 ( $P_{xyIA}$ -GFP) provide relative positive controls. The pSSBm85 plasmid strain was sub-cultured to an OD<sub>600</sub> of 0.4 and induced with 0.25% (w/v) D-xylose. White squares represent OD<sub>600</sub> and are plotted on the left y-axis. Green circles represent GFP synthesis in relative fluorescence units (RFU) and are plotted on the right y-axis. Error bars are derived from four biological repeats, from single colony growth and sub-culturing.

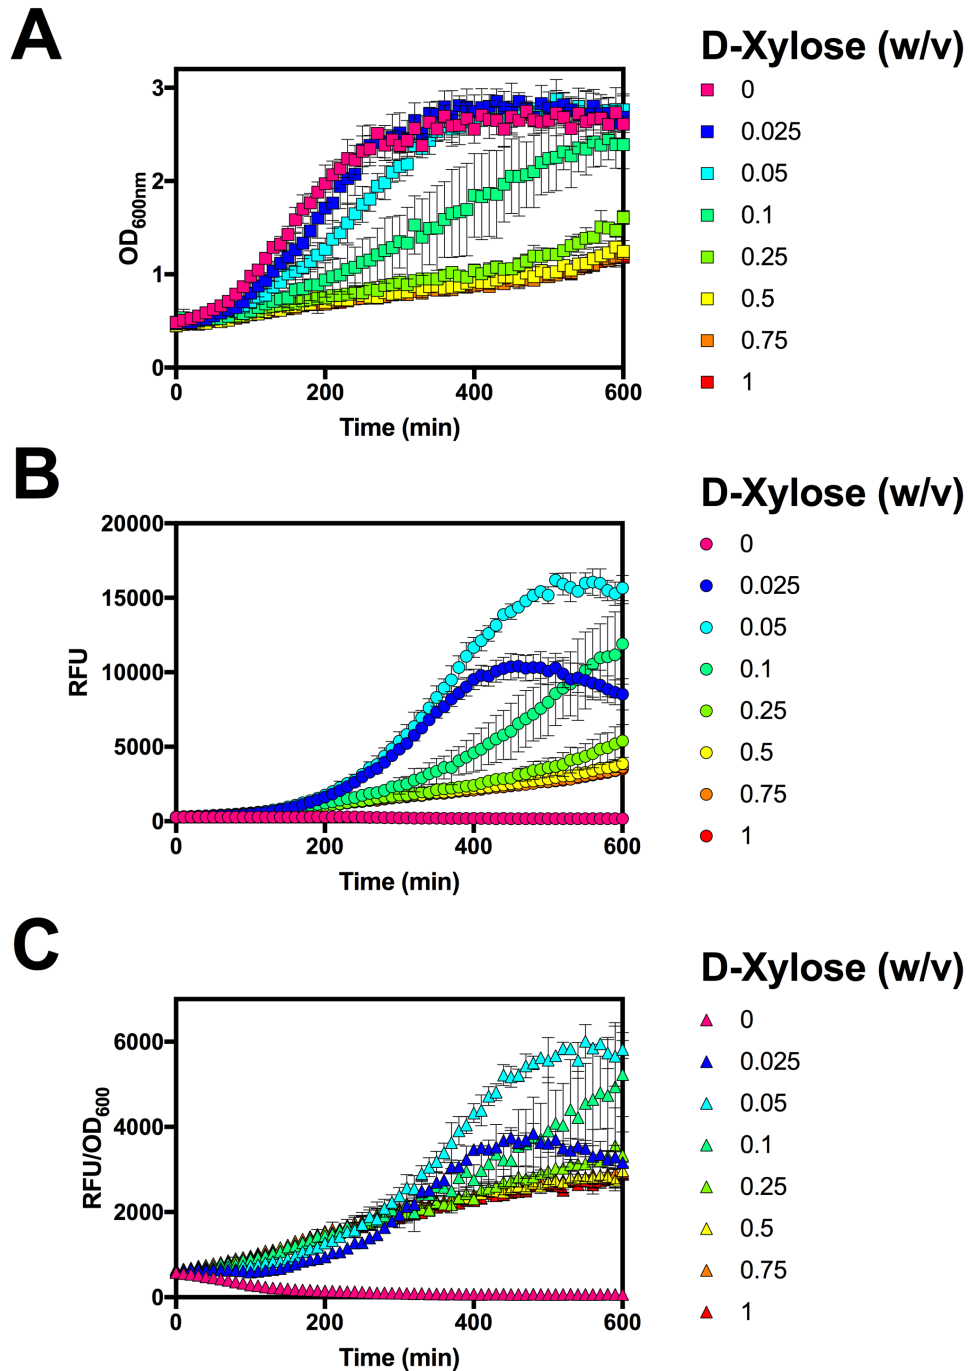

Fig. S4. Growth and GFP synthesis of the *B. megaterium* DSM319 pSSBm85 xylose-inducible promoter strain in a 96-well plate. pSSBm85 is a derivative of pKMMBm5 and contains the XylR repressor. Cultures were grown as described in supporting materials and methods, then sub-cultured into fresh medium to an OD<sub>600</sub> of 0.4 with varying concentrations of xylose and grown for 10 hours at 30°C and 600 rpm shaking. (a) Squares represent OD<sub>600</sub> growth. (b) Circles represent GFP synthesis in RFU. (c) Triangles represent RFU/OD<sub>600</sub>. Error bars are derived from four biological repeats, from single colony growth and sub-culturing.

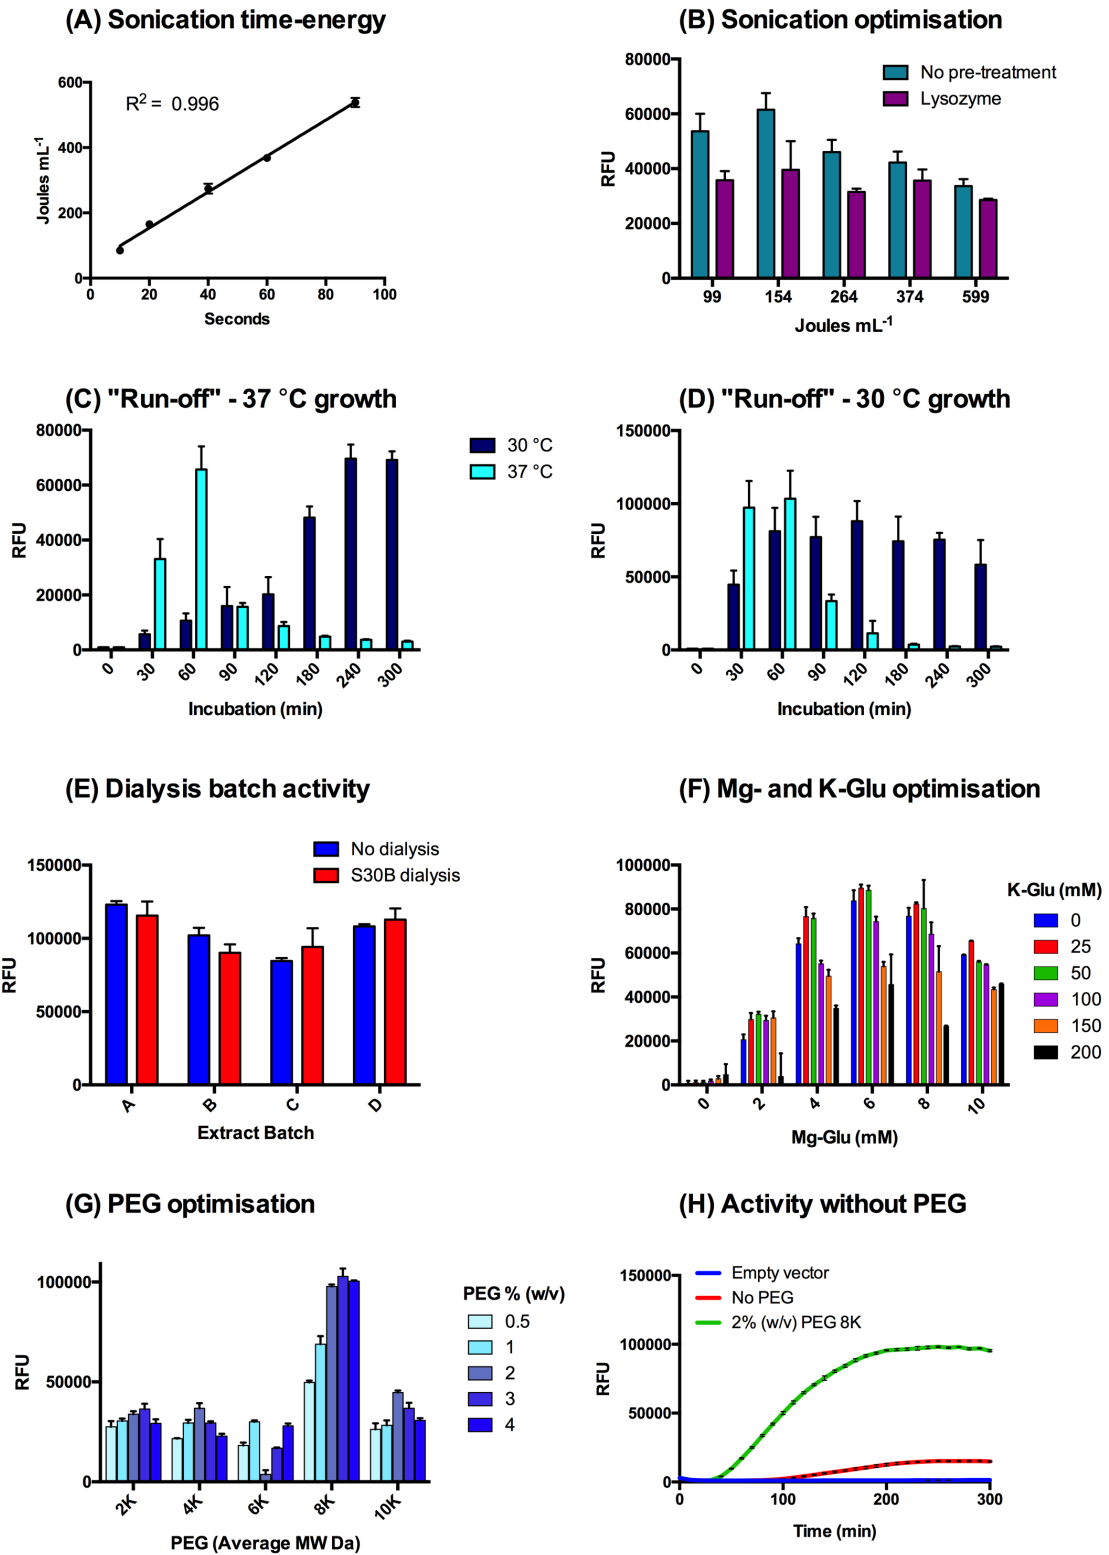

Fig. S5. Optimization of the *B. megaterium* DSM319 cell-free extract. See SI text for full details of extract preparation and testing.

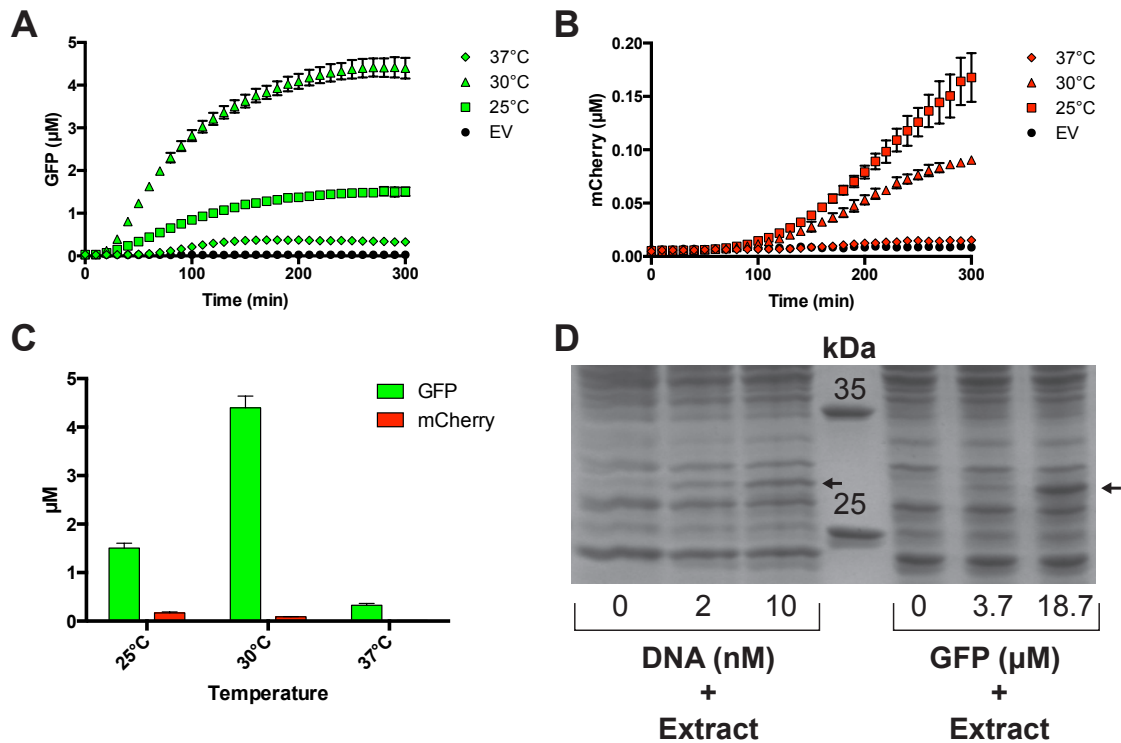

Fig. S6. GFP and mCherry production from the pRBBm258 and pRBBm267 plasmids under standard conditions with 3-PGA energy buffer. (a) 10 nM pRBBm258 incubated at 25, 30 and 37°C. (b) 10 nM pRBBm267 incubated at 25, 30 and 37°C. (c) End-point comparison of GFP and mCherry production at different temperatures. (d) SDS-PAGE analysis of pRBBm258 incubations in comparison to purified His<sub>6</sub>-tagged GFP spiked into the extract. mCherry production was not significant and could not be observed. Empty vector (pMM1520) was used as a negative control for incubations. See supplementary text for further details. We noted a decreased yield of protein (Maximum 3.4  $\mu\text{M}$ ) where the *pdh* promoter (from pRBBm258) was cloned by EcoFlex with RiboJ, a standard RBS and GFP. The slight decrease in yield, in comparison to pRBBm258 may be due to differences in RBS and spacer sequences, with AGGAAGA-N<sub>10</sub>-ATG (pRBBm258) and AGGAGGT-N<sub>9</sub>-ATG (*pdh*-RiboJ-RBS-GFP-MGapt-Bba\_B0015) used, respectively.

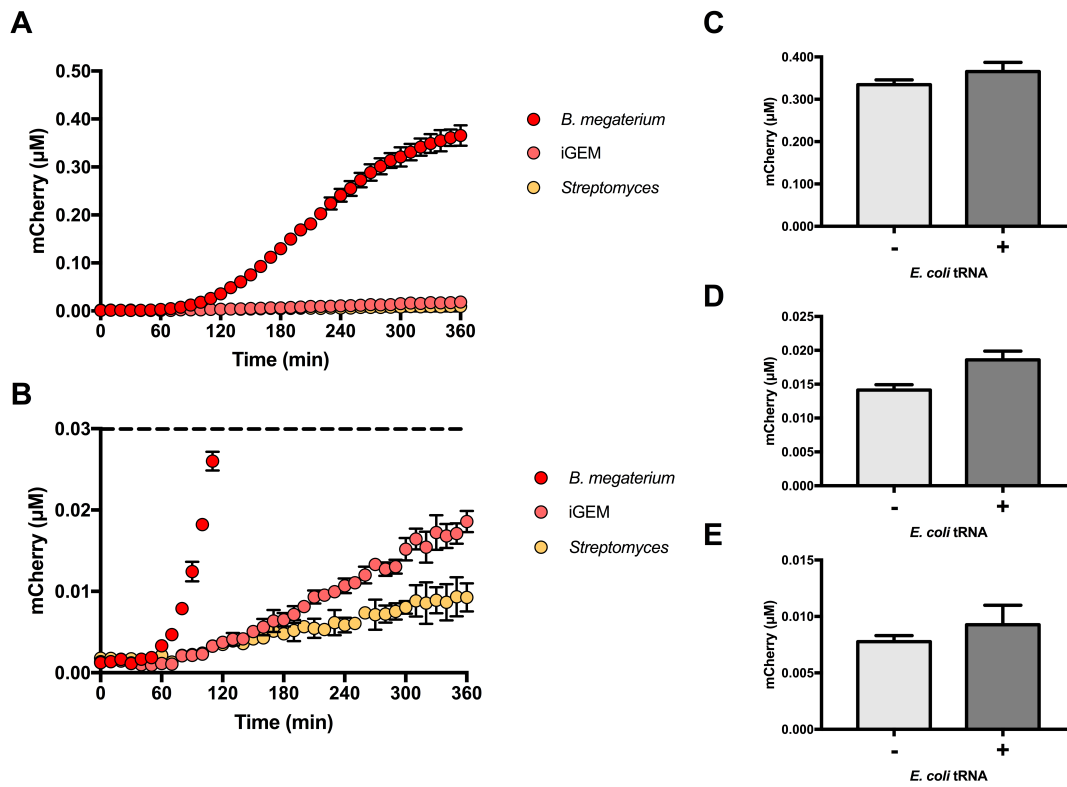

Fig. S7. mCherry production with different G+C (%) variants in the presence or absence of *E. coli* tRNA. (a) Time-course NCF reaction with 10 nM of pTU1-A-*pdh*-RiboJ-mCherry-Bba\_B0015 variants. A *B. megaterium* codon-optimised (32% G+C) variant, iGEM (62% G+C from EcoFlex kit) and a *Streptomyces* (64% G+C) optimised variant were used for comparison. (b) Zoomed in view of iGEM and *Streptomyces* variants. (c) *B. megaterium*, (d) iGEM and (e) *Streptomyces* mCherry variants synthesised in the presence or absence of *E. coli* tRNA added into the 3-PGA energy buffer. Data is presented from three technical measurements.



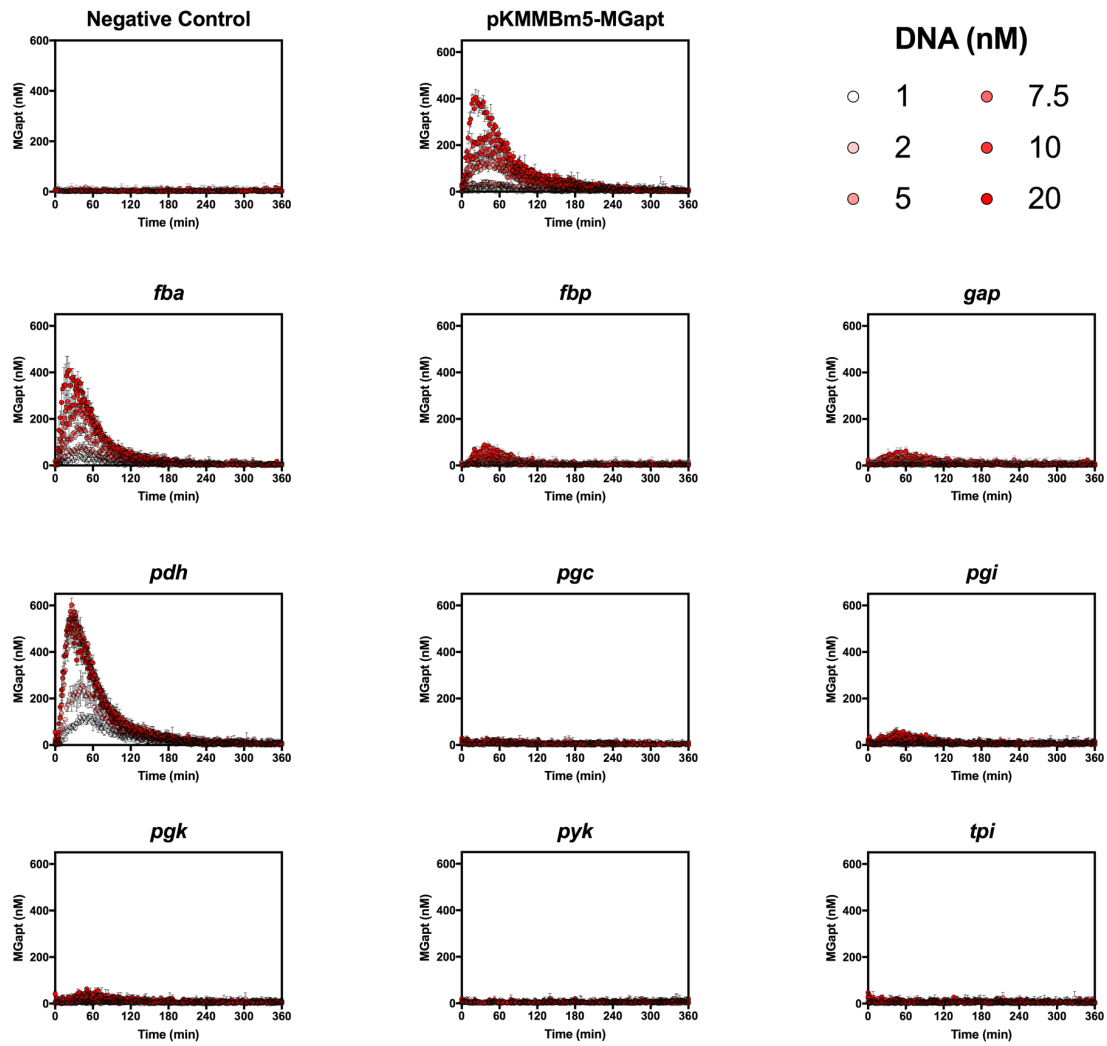

Fig. S8. RNA (nM) synthesis by the glycolysis and gluconeogenesis promoters with varying plasmid DNA (nM) concentration. pKMMBm5-MGapt was provided as a relative comparison. In the negative control plasmid ( $P_L$ -RiboJ-GFP-MGapt-Bba\_B0015), the promoter is replaced with TATATA promoter linker ( $P_L$ ). Reactions were performed under standard conditions as three technical measurements.

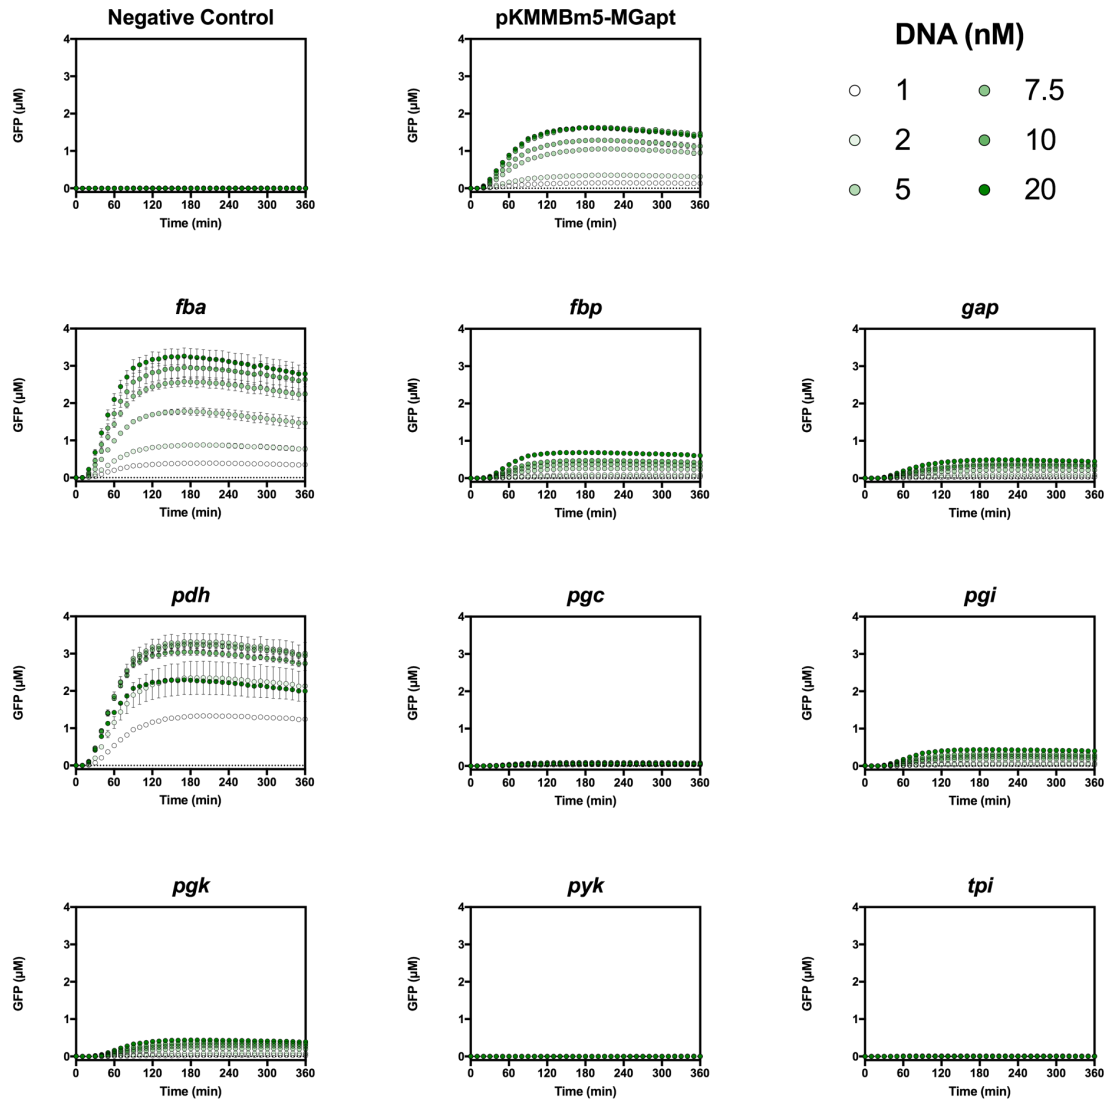

Fig. S9. GFP ( $\mu\text{M}$ ) synthesis by the glycolysis and gluconeogenesis promoters with varying plasmid DNA (nM) concentration. pKMMBm5-MGapt was provided as a relative comparison. In the negative control plasmid ( $P_L$ -RiboJ-GFP-MGapt-Bba\_B0015), the promoter is replaced with TATATA promoter linker ( $P_L$ ). Reactions were performed under standard conditions as three technical measurements.

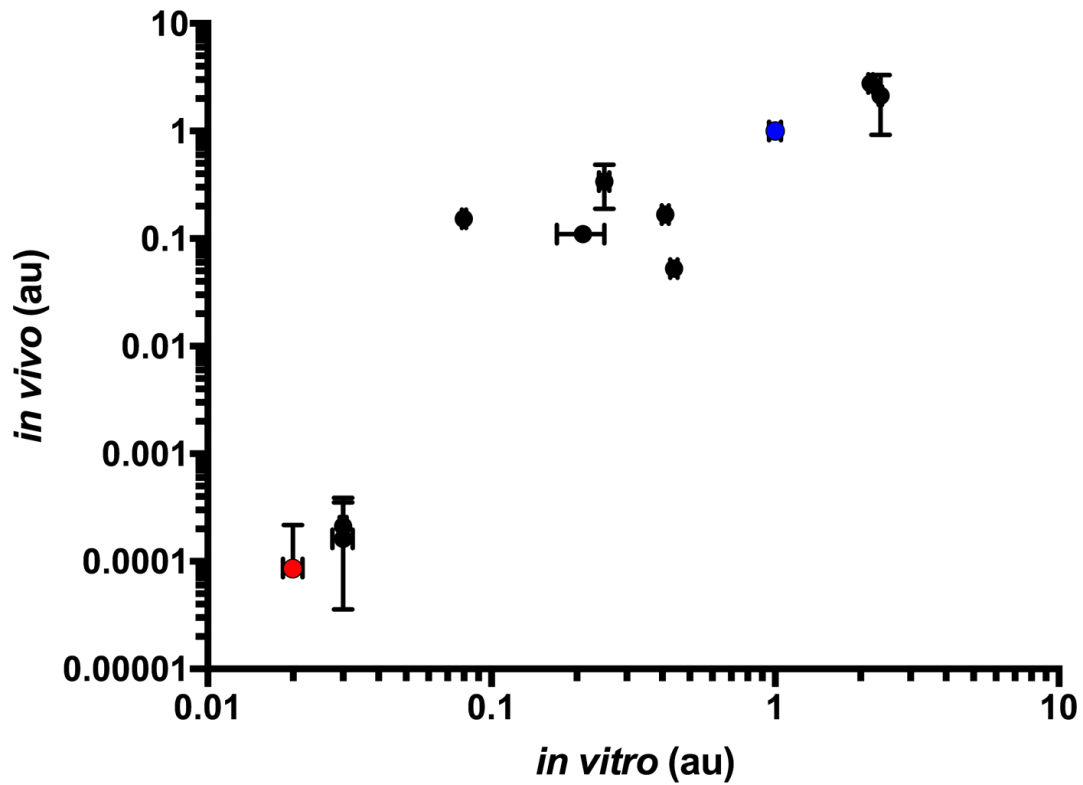

Fig. S10. Normalised *in vivo* and cell-free constitutive promoter activity relative to the strongest promoter (*pdh*). Correlation coefficient is 0.937 and P value = 0.0001. Negative control (red circle) and positive control (blue circle) data points are highlighted for comparison. Data is represented as normalised steady-state value relative to the positive control plasmid (au - arbitrary units).

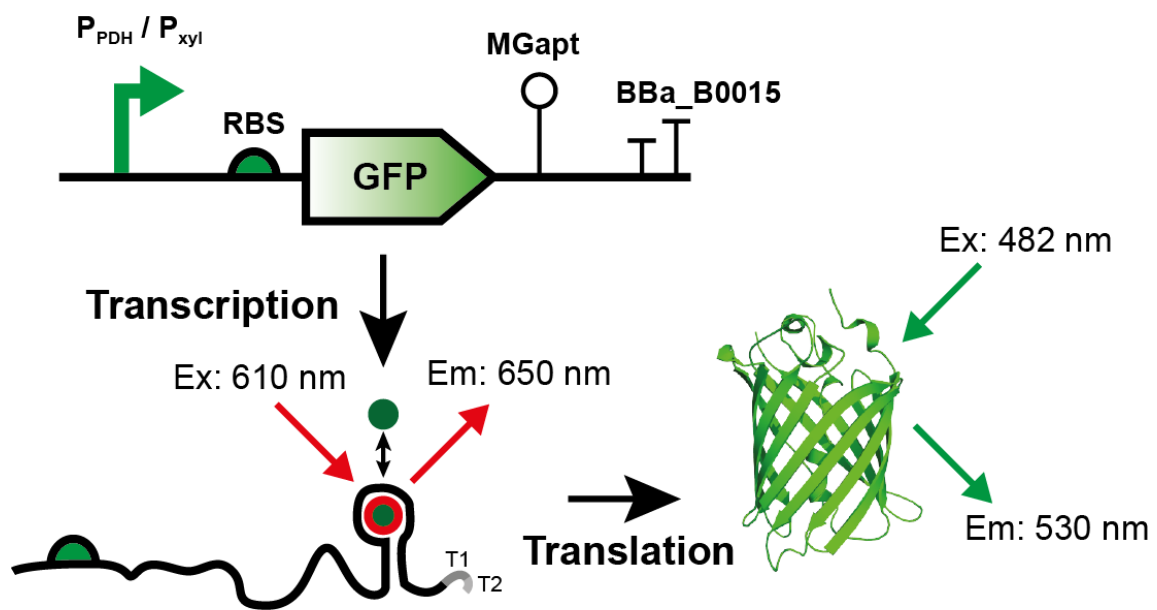

Fig. S11. Illustration of the GFP and malachite aptamer plasmids for cell-free transcription-translation in *B. megaterium* DSM319. Excitation and emission are abbreviated as Ex and Em, respectively. The transcript was detected as two bands of similar size (~920 and 950 bp, respectively) encoding the RBS, GFP and malachite green aptamer, representing two alternative transcription termination sites (T1 and T2) due to the presence of the Rho-independent double terminator Bba\_B0015, which is composed of the Bba\_B0010 and Bba\_B0012 terminators.

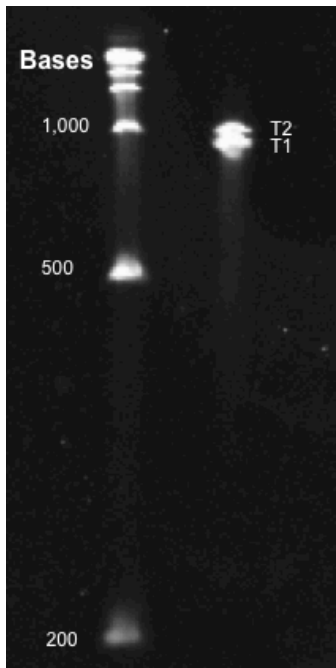

Fig. S12. Denaturing 5% TBE-urea PAGE gel of the GFP-MGapt transcript. Two bands of similar size (~920 bp) encoding the RBS, GFP and malachite green aptamer were detected (T1 and T2), representing the two alternative termination sites after the malachite green aptamer from the double terminator Bba\_B0015, composed of joined Bba\_B0010 and Bba\_B0012 terminators.

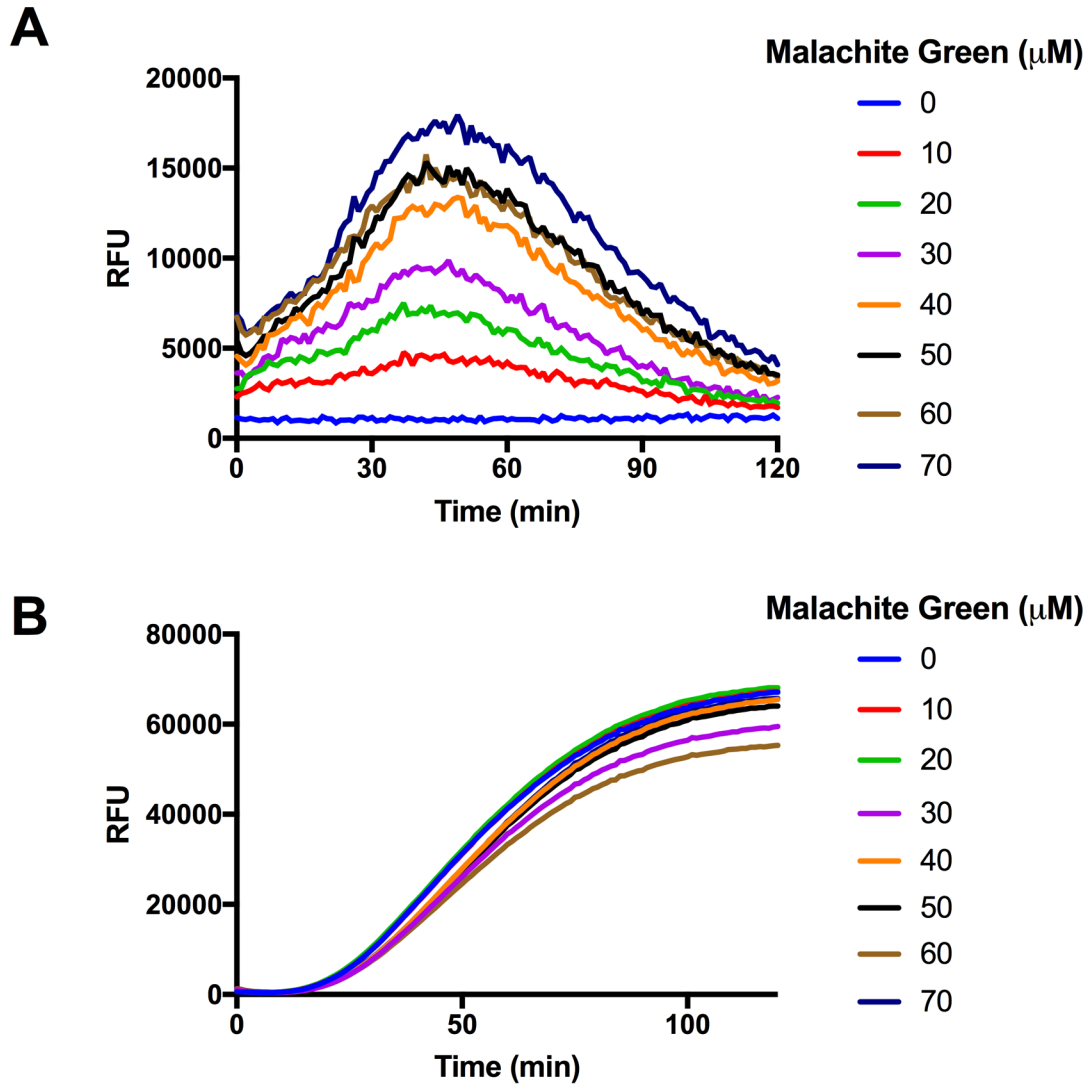

Fig. S13. Optimising the malachite green concentration for real-time (A) mRNA and (B) GFP synthesis in *B. megaterium* NCF. 10 nM of pKMMBm5-MGapt plasmid was used under standard conditions. Data is presented from three technical measurements, although error bars are removed for clarity between concentrations. Malachite green did not inhibit protein synthesis up to 70  $\mu\text{M}$ .

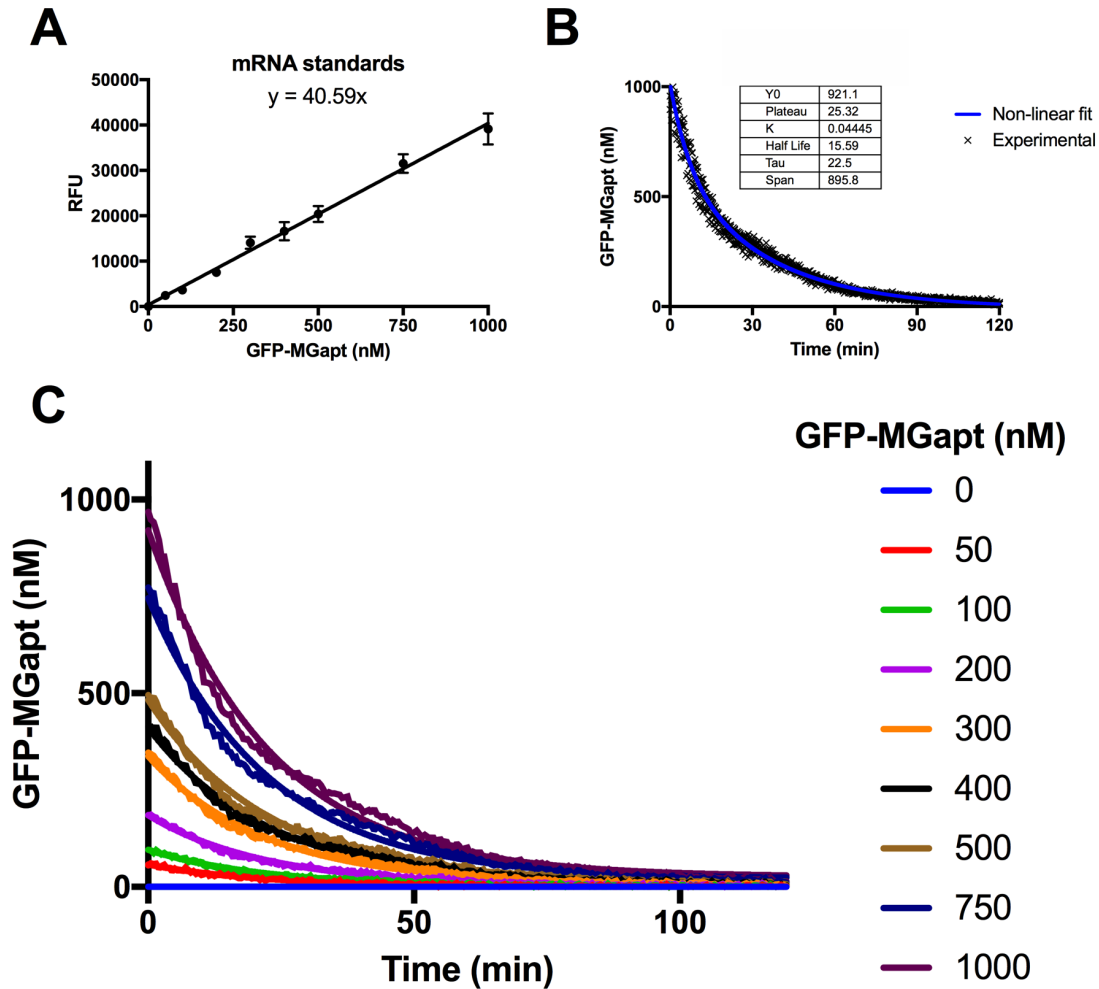

Fig. S14. mRNA standards and decay for the malachite green aptamer. (a) Purified mRNA standards were prepared in  $10 \text{ mg mL}^{-1}$  of extract with 3-PGA energy buffer, amino acids, 2% PEG8K, 6 mM Mg-glutamate, 50 mM K-glutamate and  $25 \text{ }\mu\text{M}$  malachite green. Fluorescent measurements (Ex: 610-10, Em: 650-10) were recorded every 30 s for 2 hrs. Standard curve of time zero fluorescence measurements of GFP-MGapt concentrations. (b) Decay rate in cell-free extract. Experimental data-points (black crosses) and a non-linear fit (blue line) of half-life was estimated based on a single-phase exponential decay function of  $Y = (Y_0 - P)e^{-\kappa t} + P$ , where Y is mRNA concentration,  $Y_0$  is the mRNA concentration at time zero, P is mRNA concentration at infinity,  $\kappa$  is the rate constant and  $\tau$  is the time constant. (c) Decay rate of a range of GFP-MGapt concentrations from 50-1000 nM. Data is presented from three technical measurements

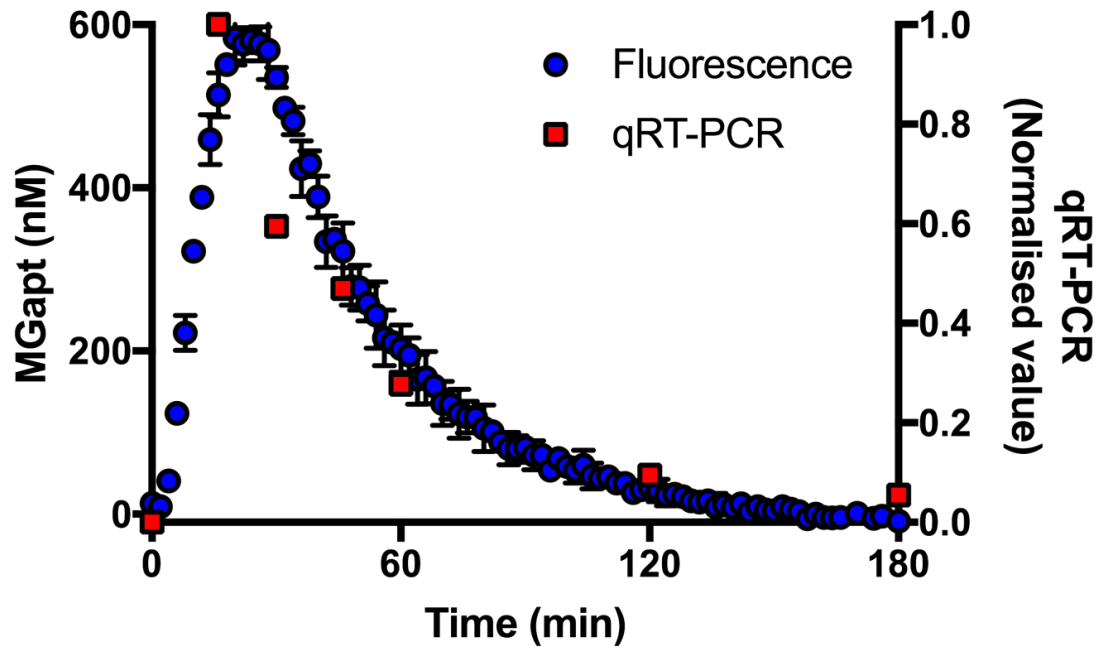

Fig. S15. qRT-PCR time-course measurement of the GFP-MGapt transcript in comparison to real-time MGapt fluorescence. Data was analysed as described in the supporting methods.



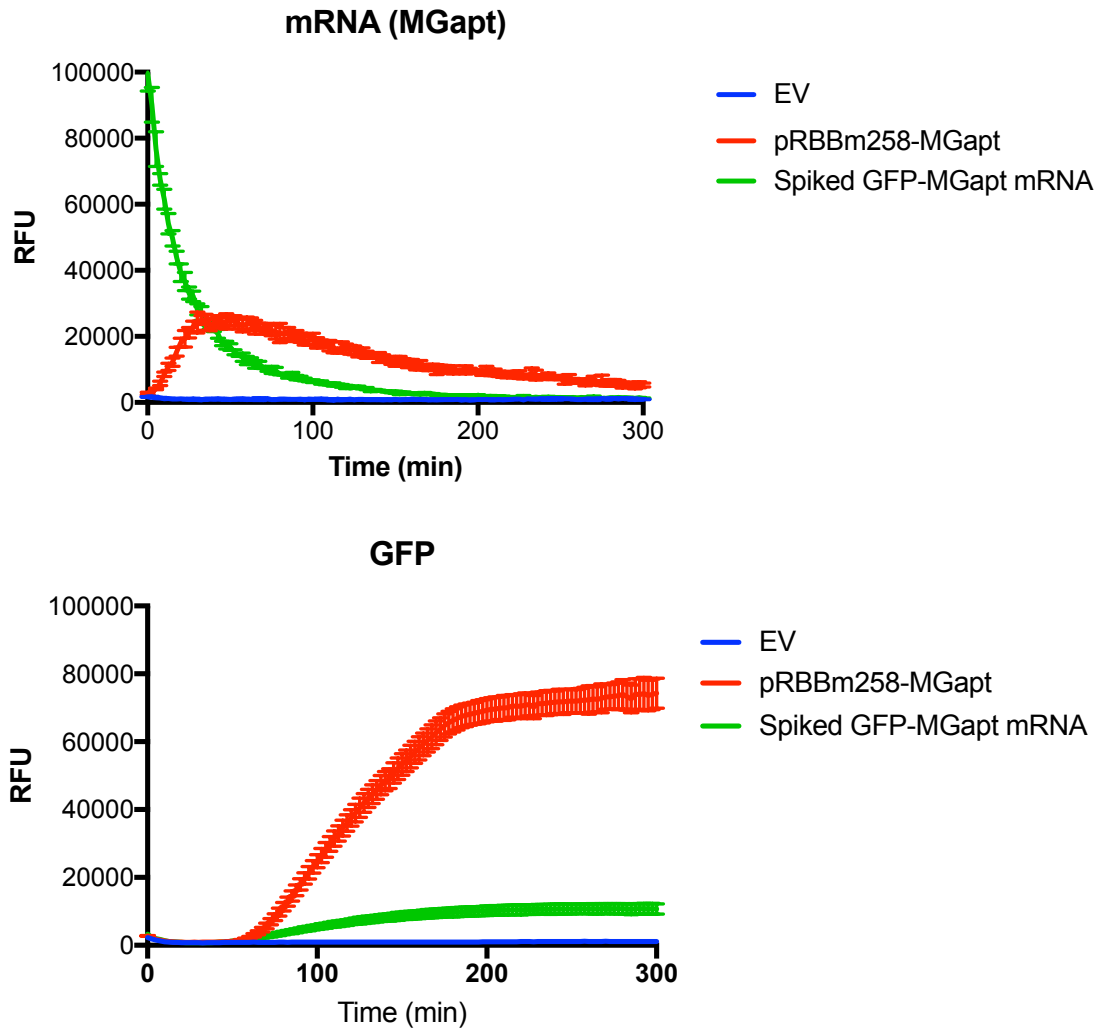

Fig. S16. Incubation of pure mRNA GFP-MGapt transcript into the cell-free reaction. Pre-spiked mRNA (green line) with  $10 \text{ mg mL}^{-1}$  *B. megaterium* DSM319 extract, 3-PGA energy mix, amino acids, 6 mM Mg-glutamate, 50 mM K-glutamate and 2% PEG8K. Empty vector (EV – blue line) and 10 nM pRBBm258-MGapt (red line) were run as controls for comparison. Reactions were performed under standard conditions. Data is presented from three technical measurements.

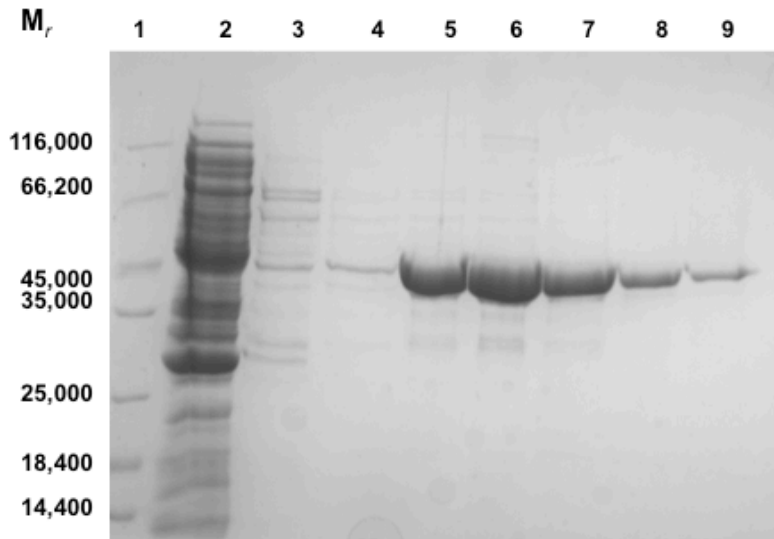

Fig. S17. Purification of XylR<sup>His</sup> recombinantly produced in *E. coli* BL21 (DE3) pLysS. Purification fractions were analyzed with a 12 % SDS-PAGE gel. The gel was stained with Coomassie Brilliant Blue G250. Lane 1: Unstained Protein Molecular Weight Marker (Fermentas), Lane 2: soluble extract, Lane 3: 50 mM imidazole wash, Lane 4: 100 mM imidazole wash and Lanes 5-9: 400 mM imidazole elution fractions.

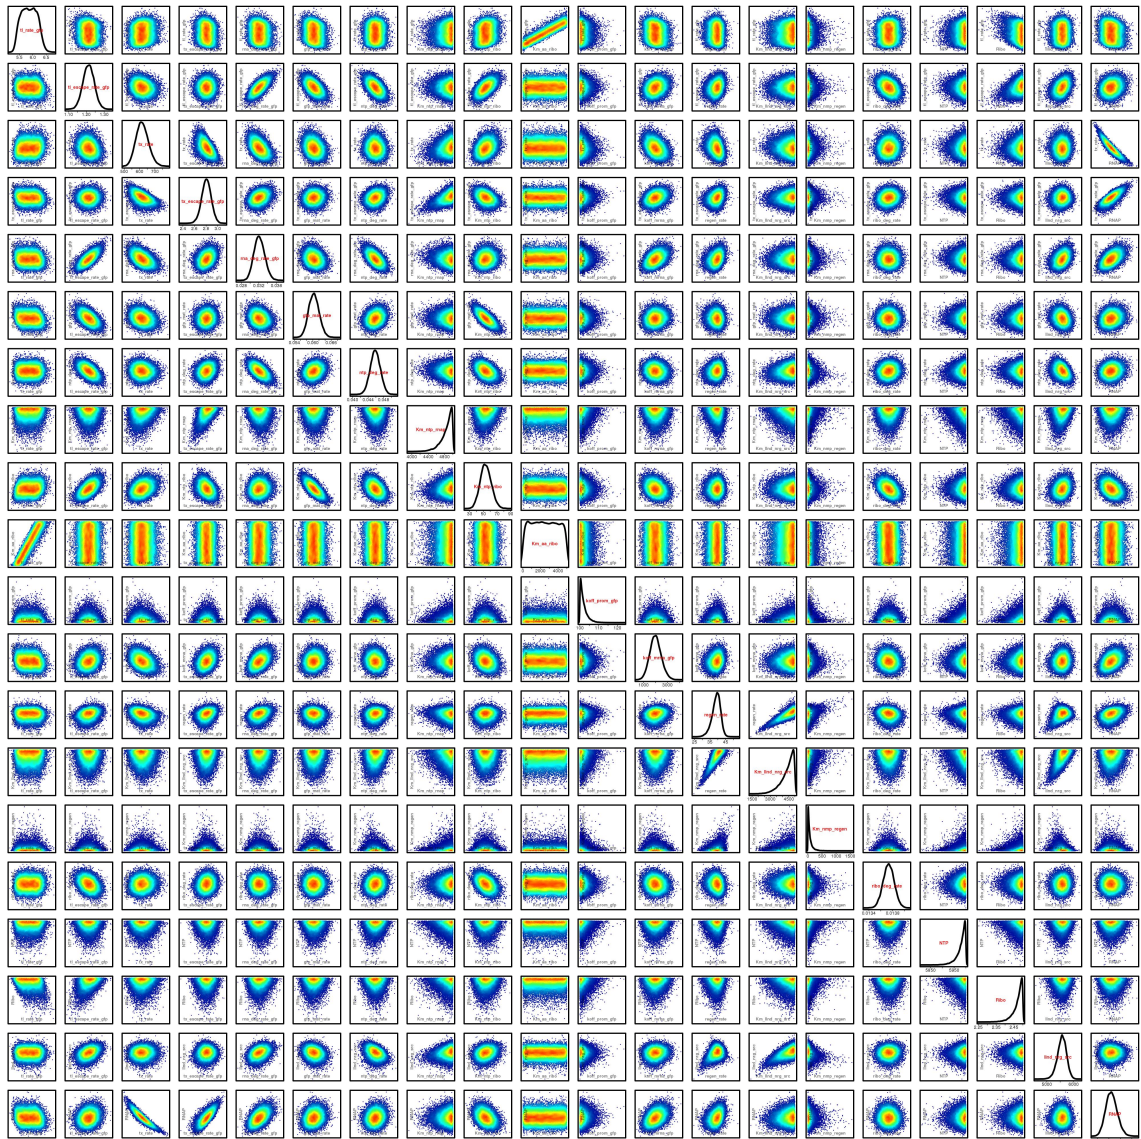

Fig. S18. Posterior distribution represented as univariate and bivariate marginal distributions after MCMC Bayesian model parameter inference with data from the pKMMBm5 plasmid titration experiment (Main text Fig. 2; see Table S9 for details on the model parameters). The posterior distribution is a complex multidimensional probability distribution of the model parameters inferred from the information contained in the experimental data (Main text Fig. 2). The diagonal histograms show the univariate marginal posterior distribution for each of the model parameters. The off-diagonal plots show the bivariate marginal posterior distributions, where each point is a sample from posterior distribution and the color indicates the density of points. These off-diagonal plots can indicate correlations between different parameters (e.g. `tx_rate` is negatively correlated with RNAP concentration as would be expected, see plot on bottom row, column three). The axes of the off-diagonal plots are not shown for reasons of space but have the same scales as the corresponding diagonal plots. Parameter units are the same as those in Table S9.

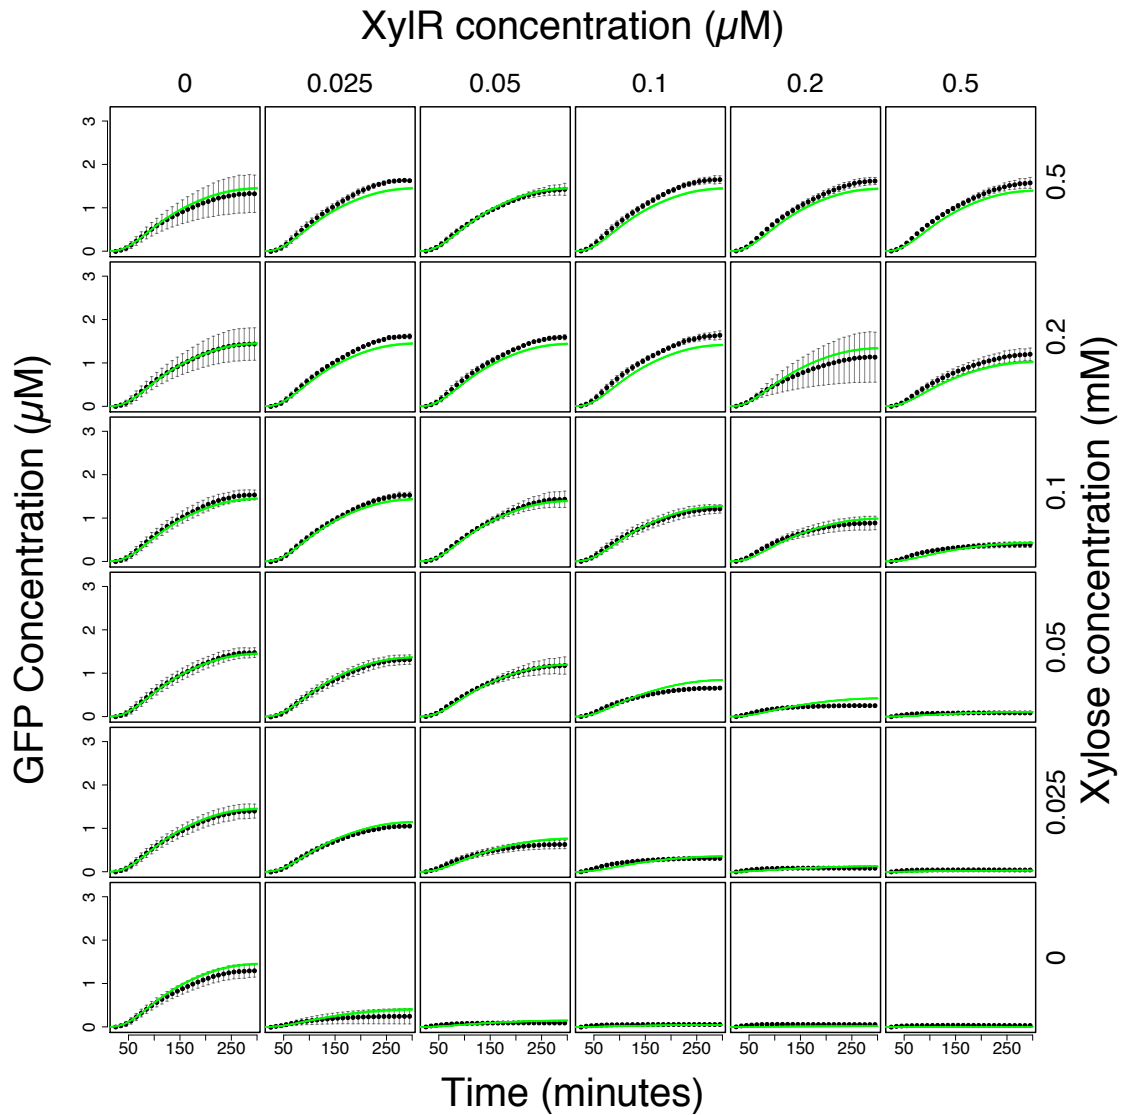

Fig. S19. Time-course experimental and simulated data of the xylose-XyIR experiment (Main text Fig. 3) with 1 nM pKMMBm5 plasmid. The experimental trajectories are shown in black (where the error bars indicate standard error) and 100 different simulated trajectories are shown in green with parameter sets randomly selected from the posterior distribution (Fig. S22).

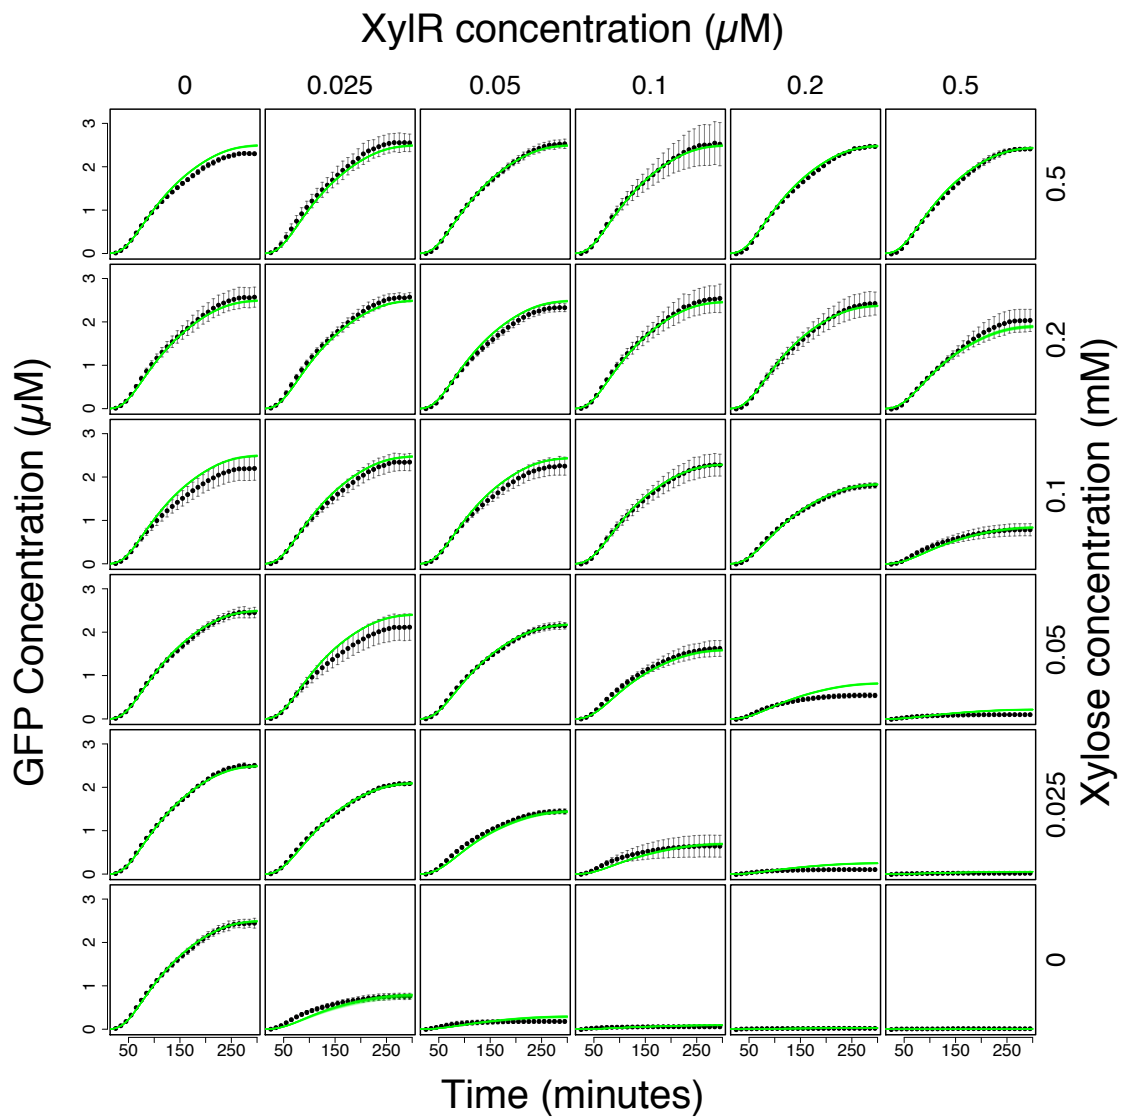

Fig. S20. Time-course experimental and simulated data of the xylose-XylR experiment (Main text Fig. 3) with 2 nM pKMMBm5 plasmid. The experimental trajectories are shown in black (where the error bars indicate standard error) and 100 different simulated trajectories are shown in green with parameters randomly selected from the posterior distribution (Fig. S22).

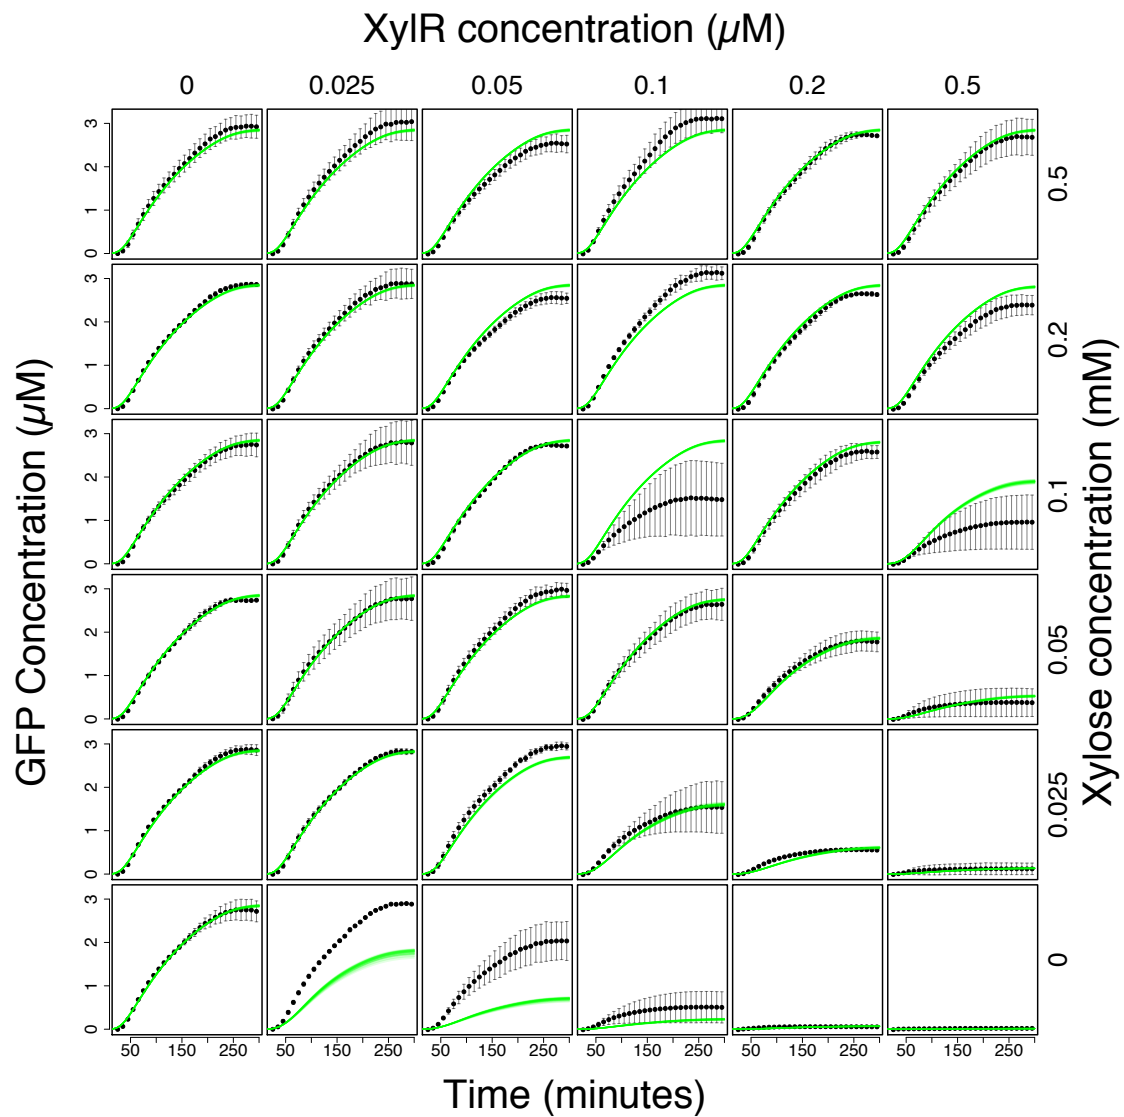

Fig. S21. Time-course experimental and simulated data of the xylose-XylR experiment (Main text Fig. 3) with 5 nM pKMMBm5 plasmid. The experimental trajectories are shown in black (where the error bars indicate standard error) and 100 different simulated trajectories are shown in green with parameters randomly selected from the posterior distribution (Fig. S22).

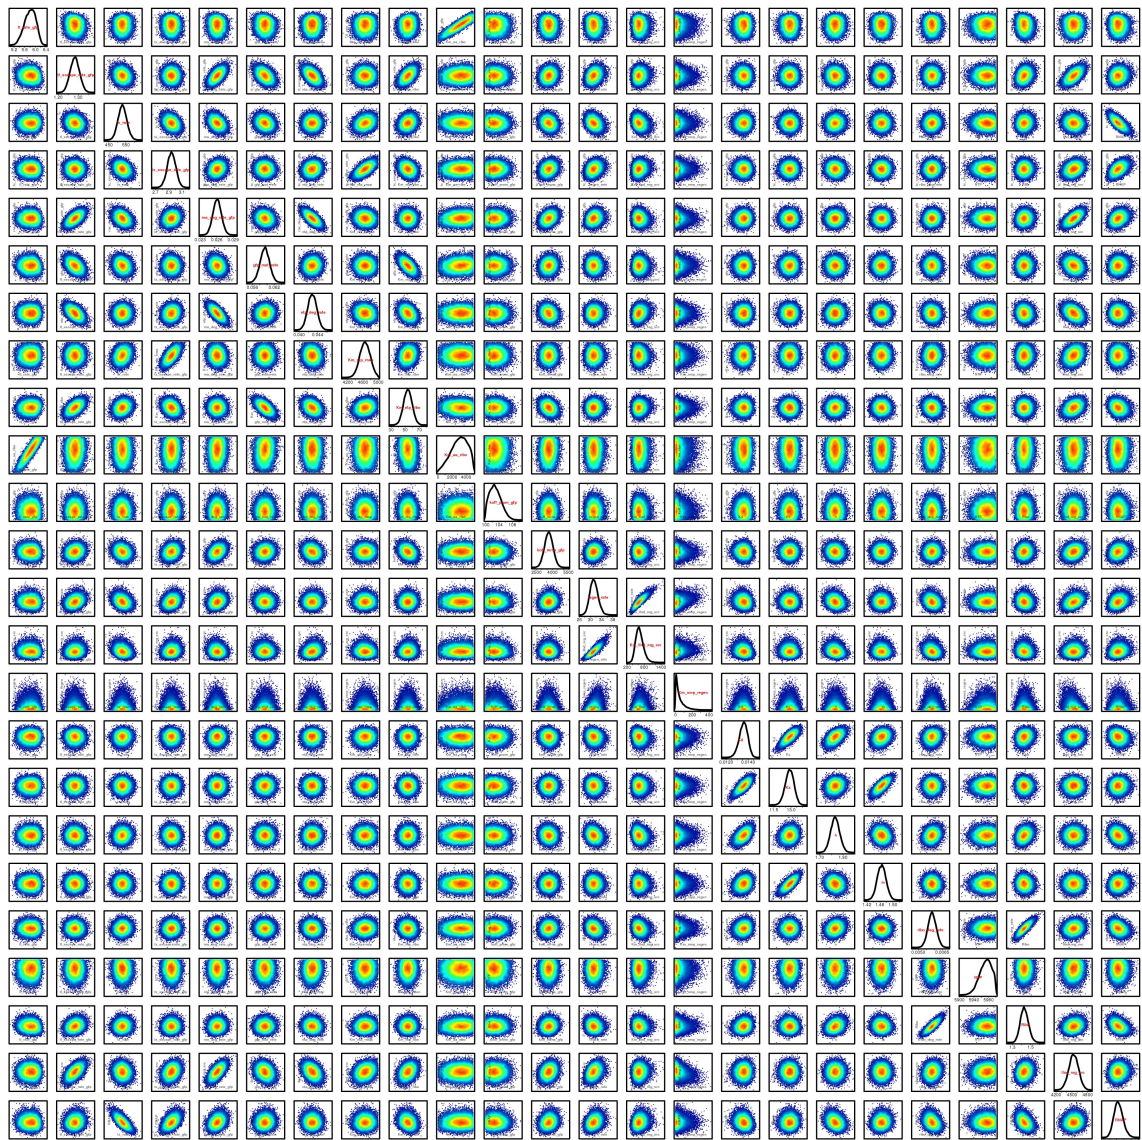

Fig. S22. Posterior distribution represented as univariate and bivariate marginal distributions after MCMC parameter inference with experimental data from the xylose-XylR experiment (Figs S19-S21 and Main text Fig. 3; see Table S9 for details on the model parameters). The posterior distribution is a complex multidimensional probability distribution over the model parameters inferred from the information contained in the experimental data (Figs S19-S21). The diagonal histograms show the univariate marginal posterior distribution for each of the model parameters. The off-diagonal plots show the bivariate marginal distributions, where each point is a sample from posterior distribution and the color indicates the density of points. These off-diagonal plots can indicate correlations between different parameters (e.g.  $tx\_rate$  is negatively correlated with RNAP concentration as could be expected, see plot on bottom row, column three). The axes of the off-diagonal plots are not shown for reasons of space but have the same scales as the corresponding diagonal plots. Parameter units are the same as those in Table S9.

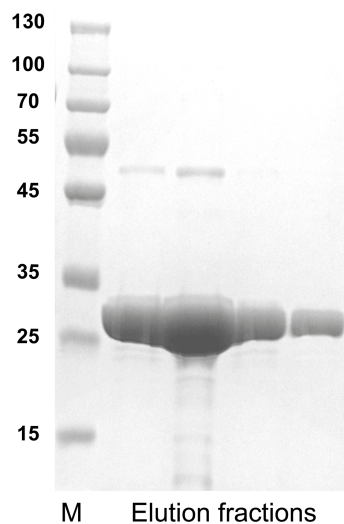

Fig. S23. Purified QconCAT\_Bm\_NCF<sup>His</sup>. Purified fractions (in 8M urea) were analyzed with a 4-20 % gradient SDS-PAGE gel. The gel was stained with InstantBlue Protein Stain (Expedeon, USA). M - PageRuler™ prestained protein ladder (ThermoFisher).



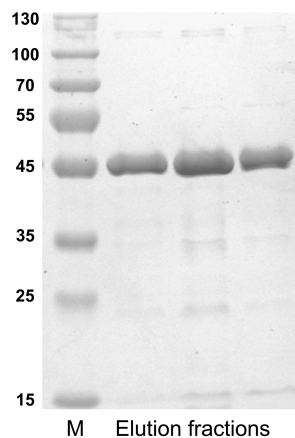

Fig. S24. Purified *B. megaterium* DSM319 RpoD<sup>His</sup>. Purified fractions were analyzed with a 4-20 % gradient SDS-PAGE gel. The gel was stained with InstantBlue Protein Stain (Expedeon, USA). M - PageRuler™ prestained protein ladder (ThermoFisher).

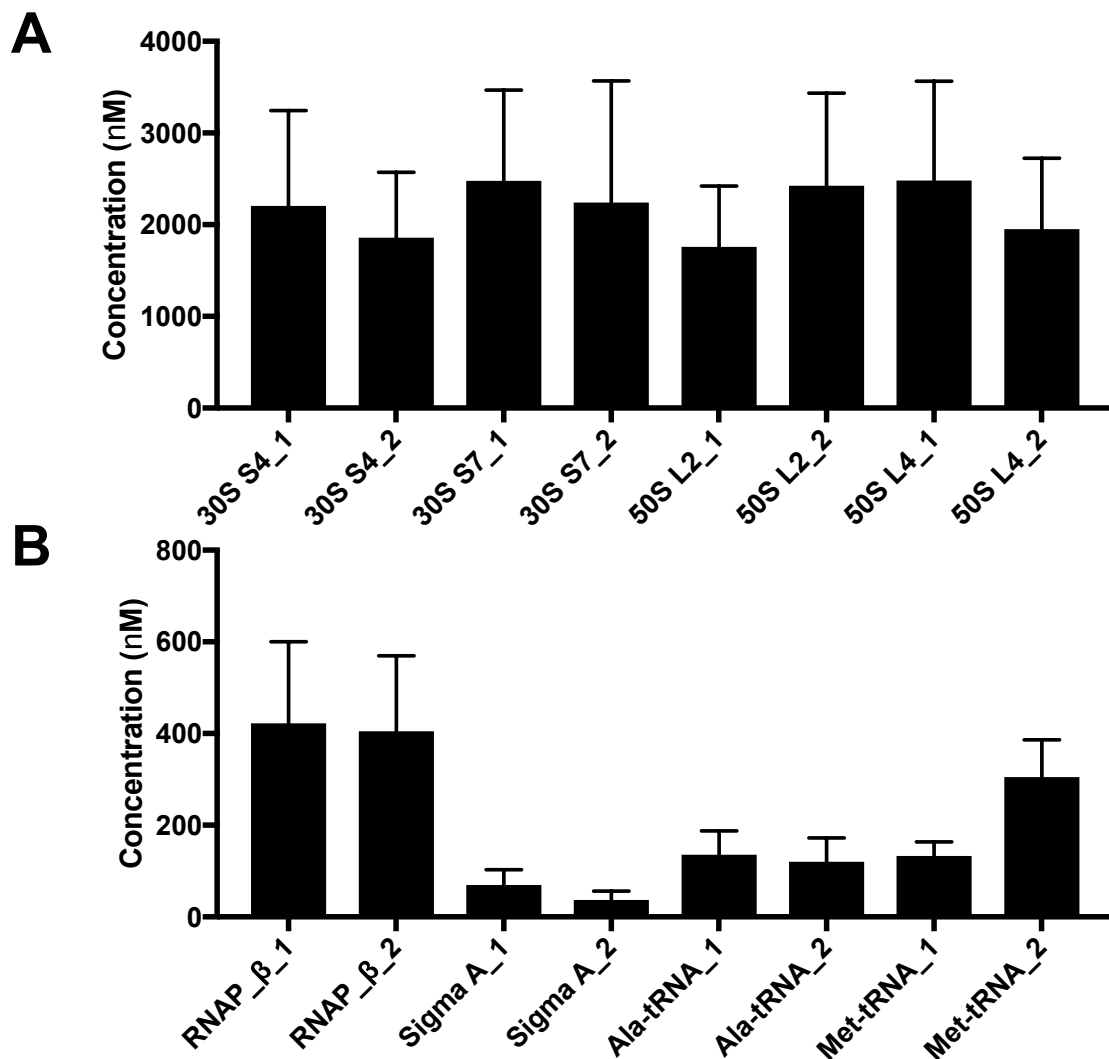

Fig. S25. Targeted LC-MS/MS values of selected transcription-translation components. (A) Concentration of ribosomal 30S S4, S7 and 50S L2, L4 ribosomal proteins. (B) Concentration of RNAP  $\beta$  subunit, Sigma A, alanyl-tRNA synthetase and methionyl-tRNA synthetase. Cell-extracts were digested with trypsin and analysed by LC-MS/MS as described in the supporting text. Data is representative of three biological repeats and quantified from a standard  $10 \text{ mg mL}^{-1}$  cell-extract reaction. Further detail on select peptides (two per protein, 1 and 2) is provided in *SI Appendix*, Fig. S25-S26 and Table S7-S8. Alanyl- and methionyl-tRNA synthetases are abbreviated to Ala-tRNA and Met-tRNA, respectively.

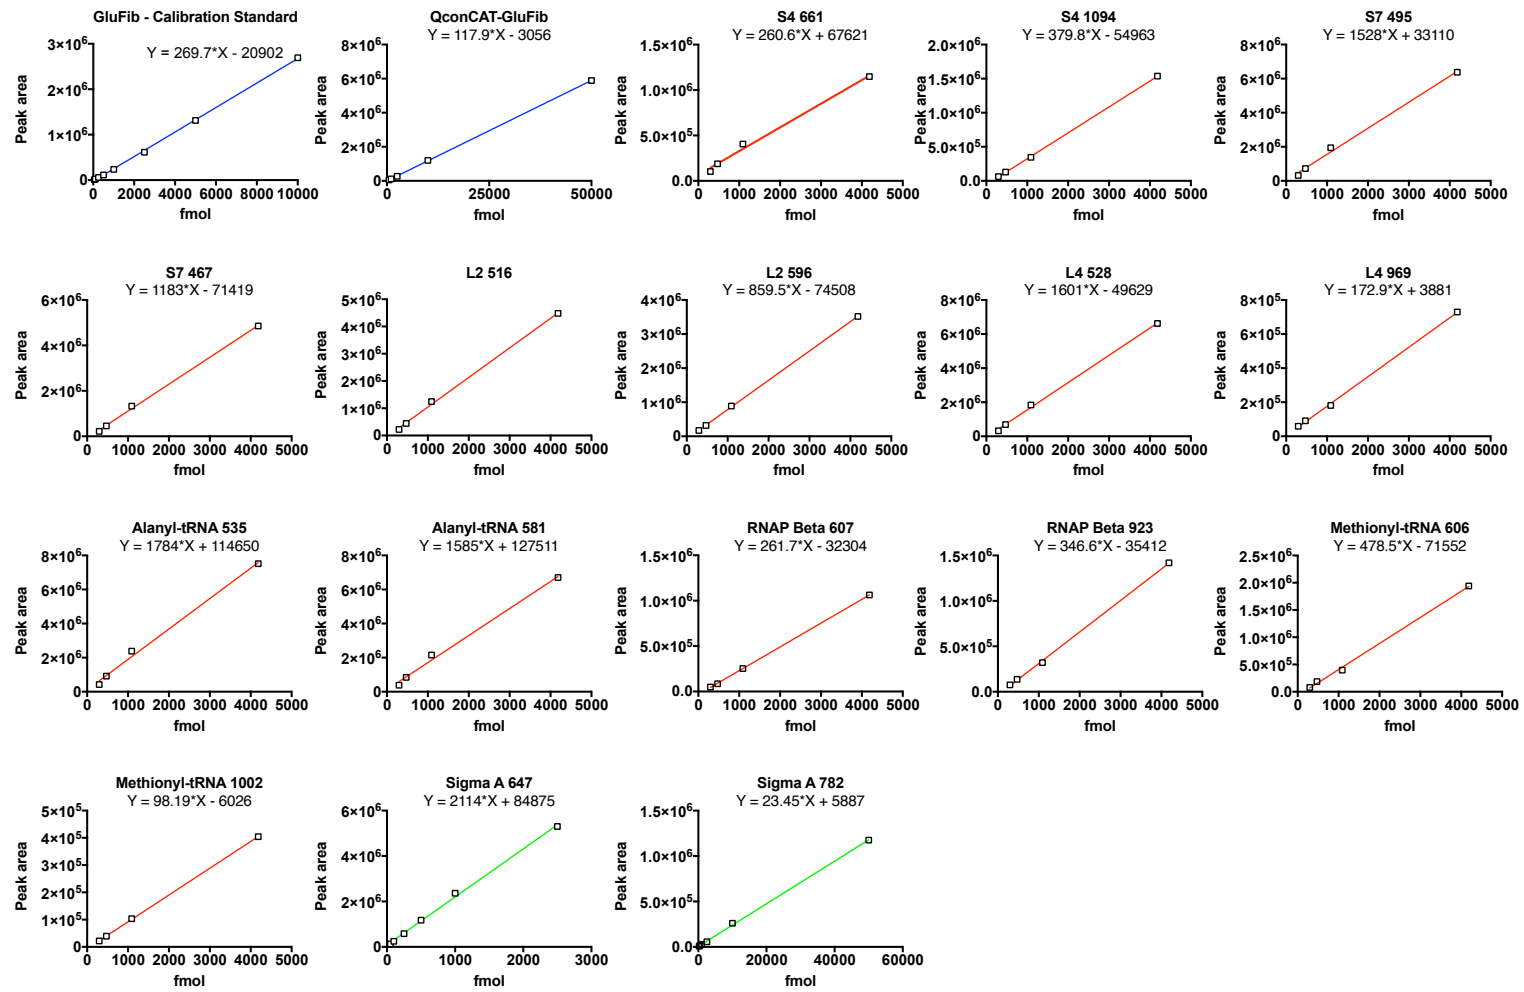

Fig. S26. LC-MS/MS <sup>15</sup>N labelled calibration standards for protein quantification

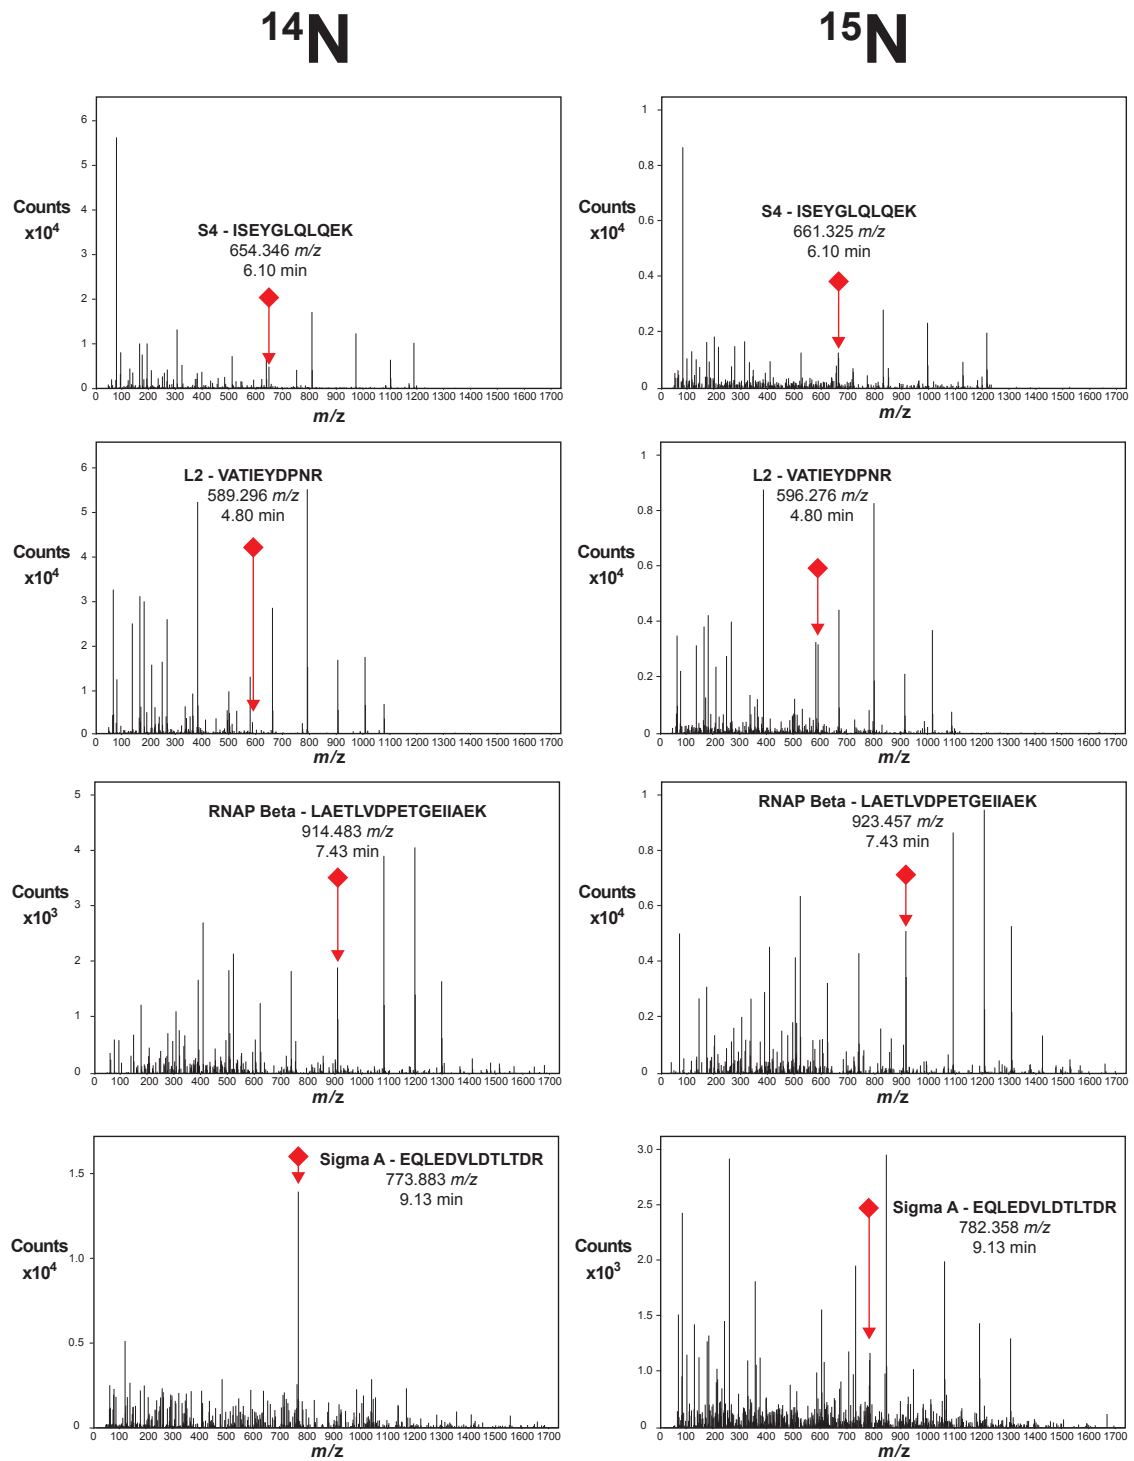

Fig. S27.  $^{14}\text{N}$  and  $^{15}\text{N}$  MS spectra of selected peptides for the S4, L2, RNAP  $\beta$  subunits and Sigma A. Please refer to Table S7-8 for further information

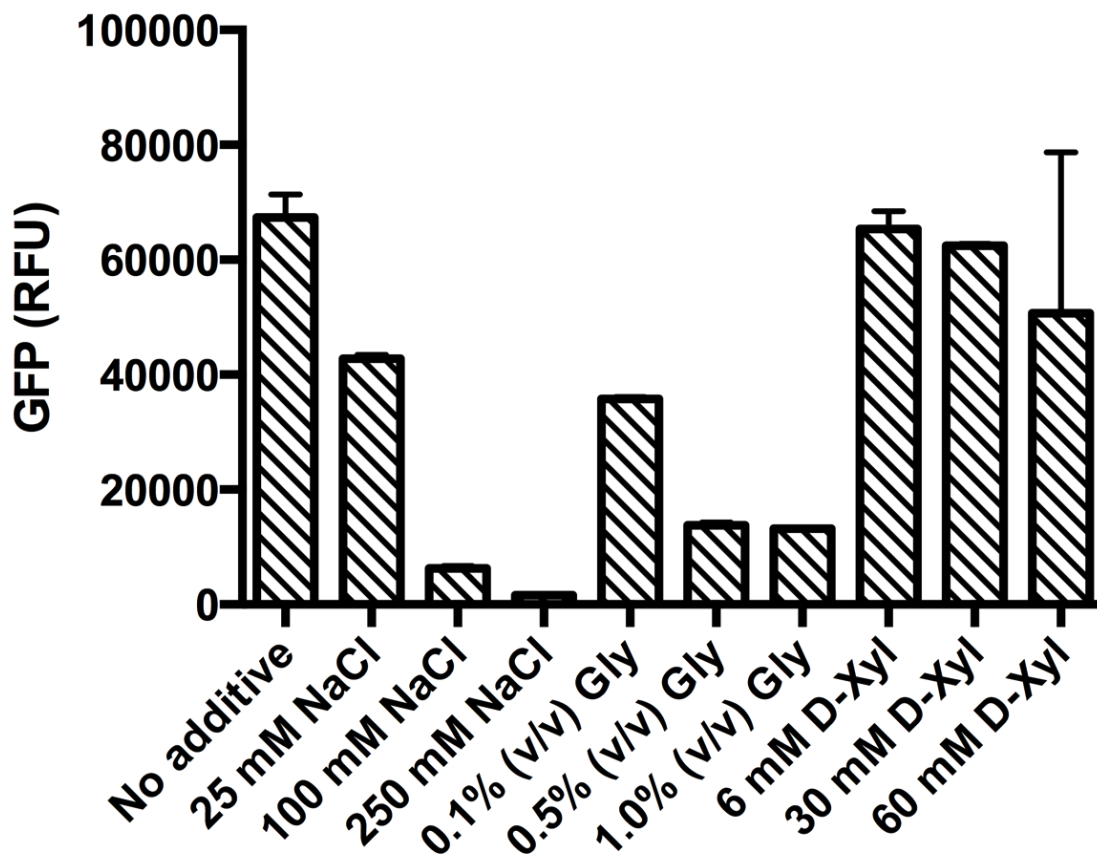

Fig. S28. Effect of additives on cell-free activity for the XylR-Xylose experiments. 10 nM of pRBBm258 was incubated in 10 mg mL<sup>-1</sup> extract and 3-PGA energy buffer. Data is presented as an end-point reading of GFP fluorescence from three technical measurements.

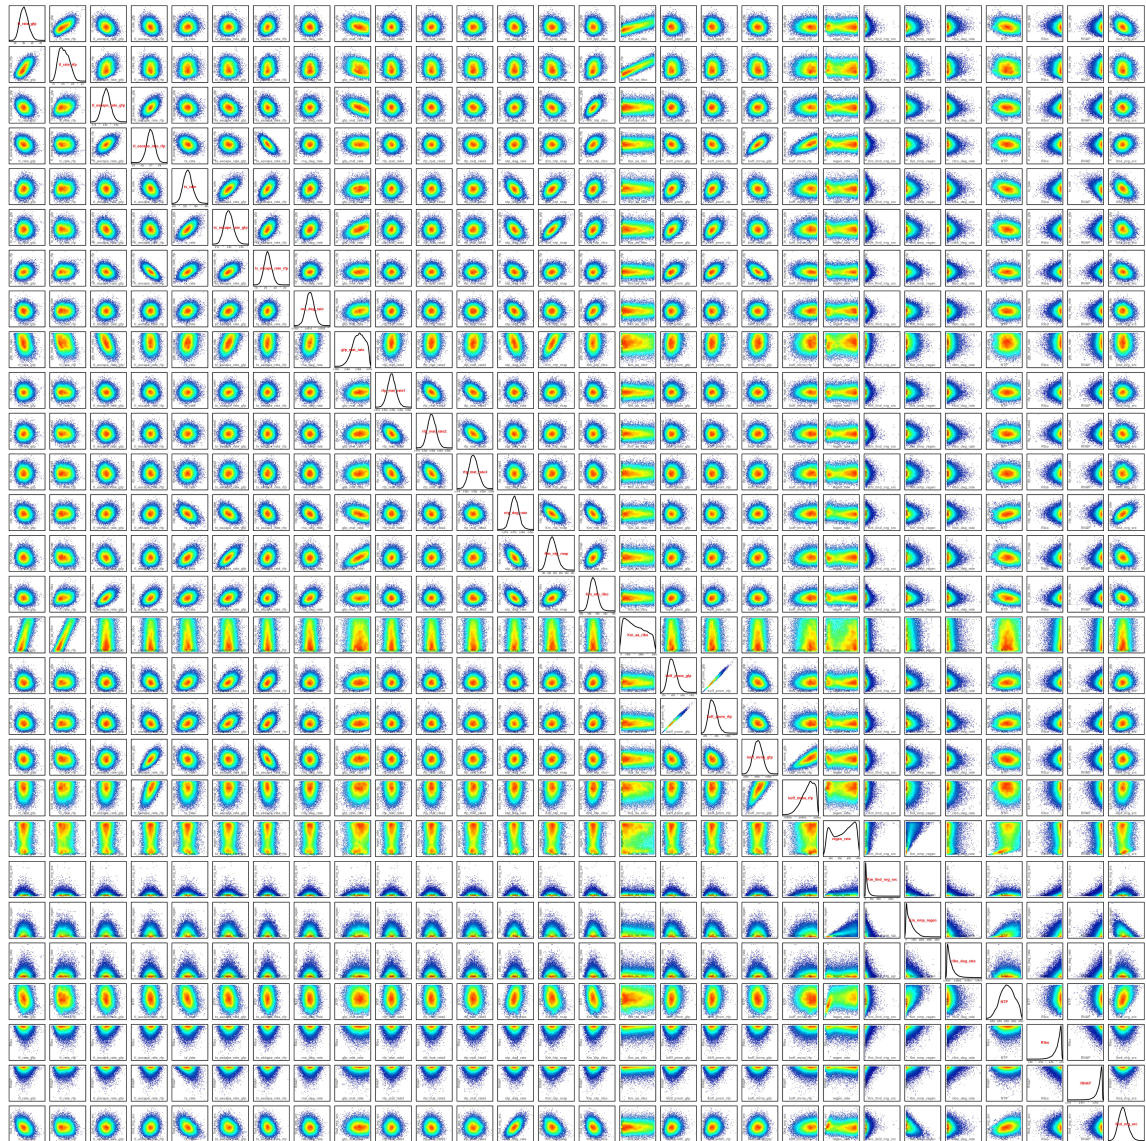

Fig. S29. Posterior distribution represented as univariate and bivariate marginal distributions after MCMC Bayesian parameter inference with data from the promoter competition experiment (Main text Fig. 4 and Fig. S29; see Table S10 for details on the model parameters). The posterior distribution is a complex multidimensional probability distribution over the model parameters inferred from the information contained in the experimental data (Main text Fig. 4 and Fig S29). The diagonal histograms show the univariate marginal posterior distribution for each of the model parameters. The off-diagonal plots show the bivariate marginal distributions, where each point is a sample from posterior distribution and the color indicates the density of points. These off-diagonal plots can indicate correlations between different parameters. The axes of the off-diagonal plots are not shown for reasons of space but have the same scales as the corresponding diagonal plots. Parameter units are the same as those in Table S10.

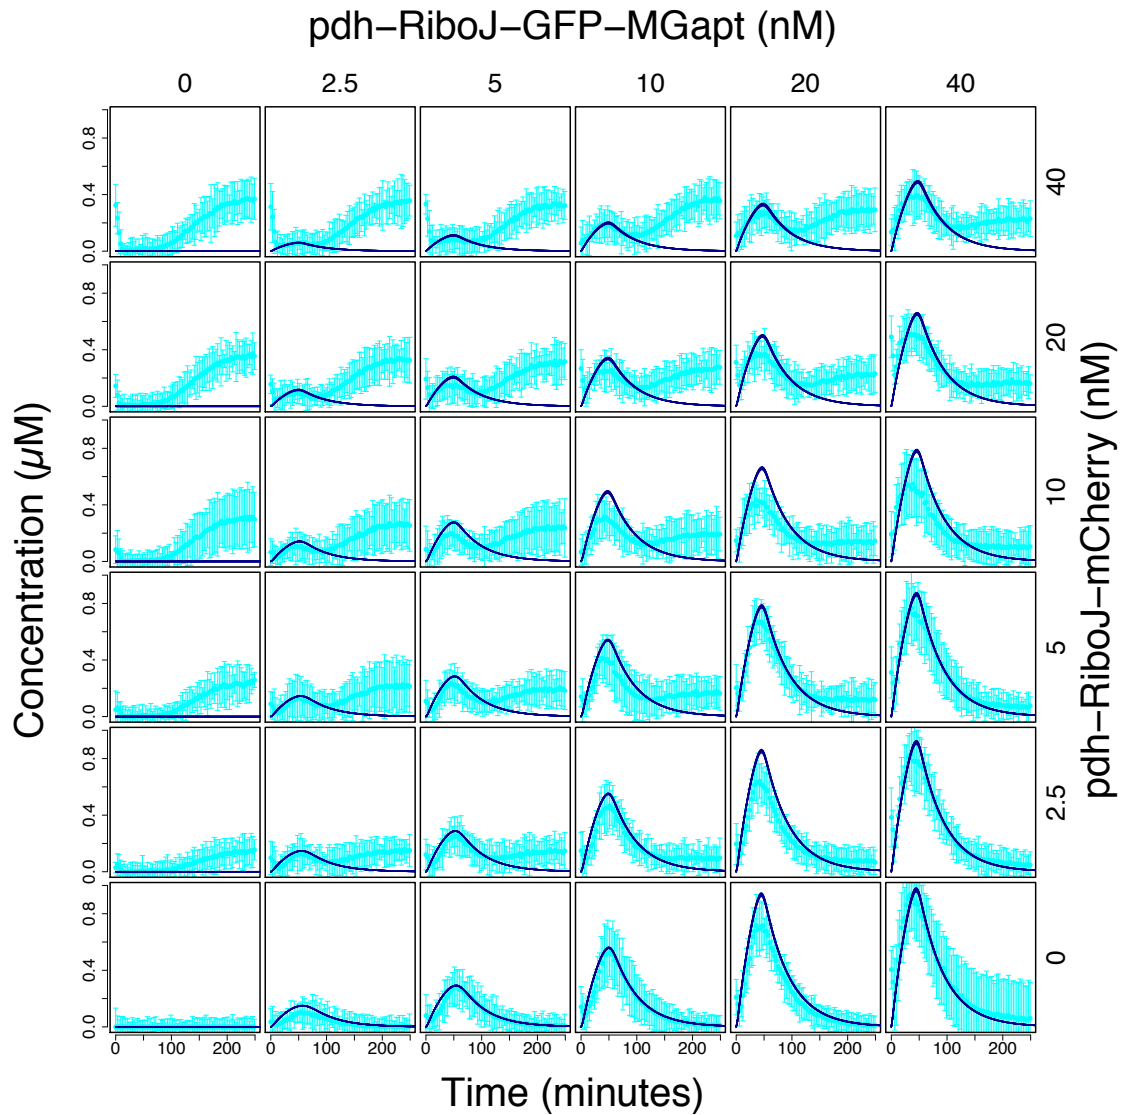

Fig. S30. Corresponding experimental and simulated GFP mRNA data corresponding from Fig. 4 in the main text. The GFP expressing plasmid (*pdh-RiboJ-RBS-GFP-MGapt-Bba\_B0015*) also contained the MGapt for monitoring mRNA levels. This had crosstalk with the mCherry signal so only the initial ~90 minutes were usable. The light blue points represent the experimentally measured data (where the error bars indicate standard error), while the dark blue lines represent simulated trajectories for 500 parameter sets randomly picked from the posterior distribution (Fig. S29).

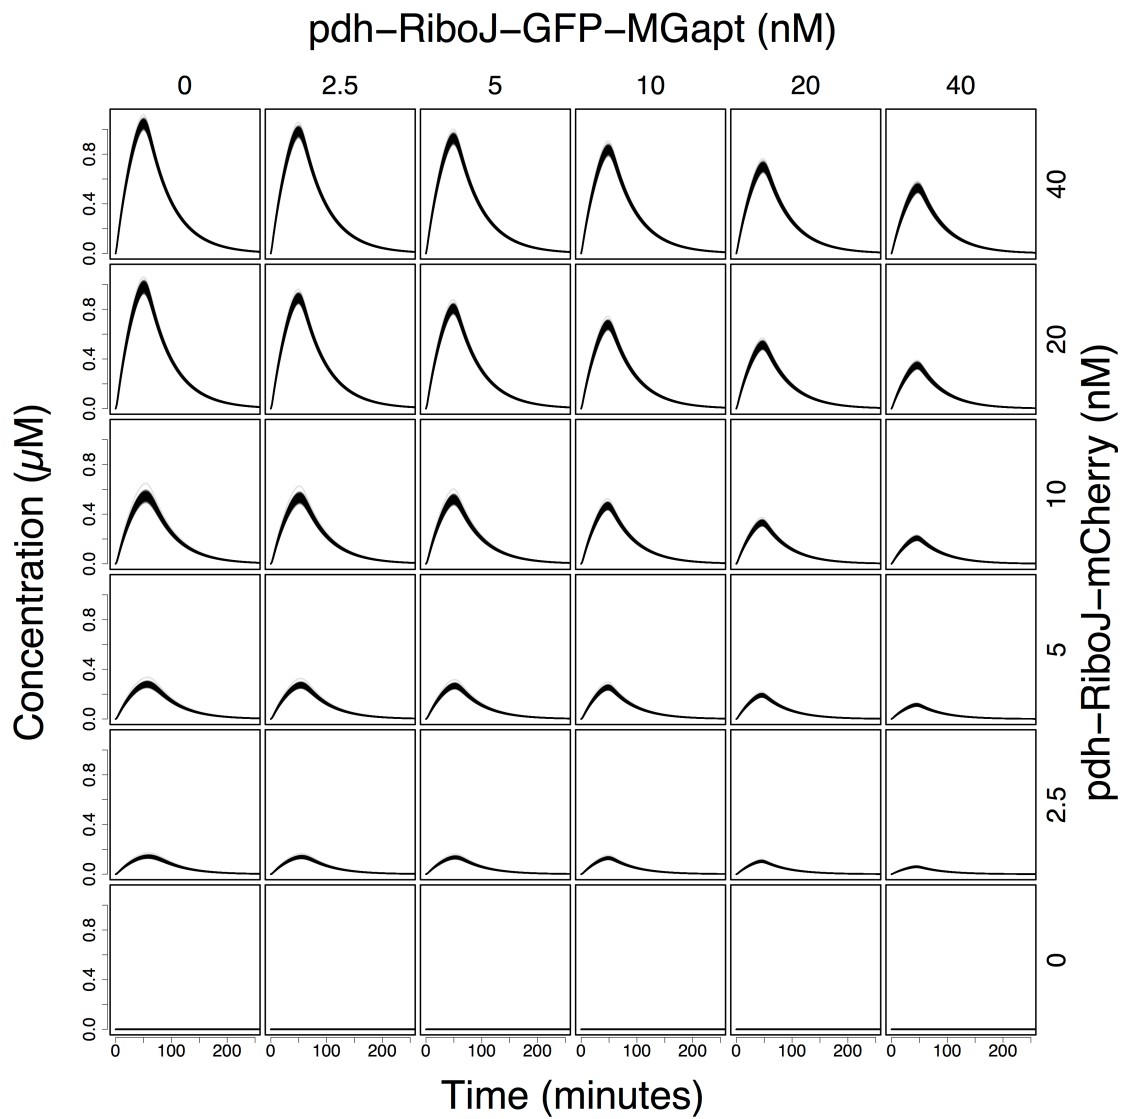

Fig. S31. Inferred mCherry mRNA data corresponding from Fig. 4 in the main text. The mCherry expressing plasmid (*pdh-RiboJ-RBS-RFP-Bba\_B0015*) did not contain an aptamer for monitoring of mRNA levels. This plot shows inferred concentration levels for the mCherry mRNA for 500 parameter sets randomly picked from the posterior distribution (Fig. S28).



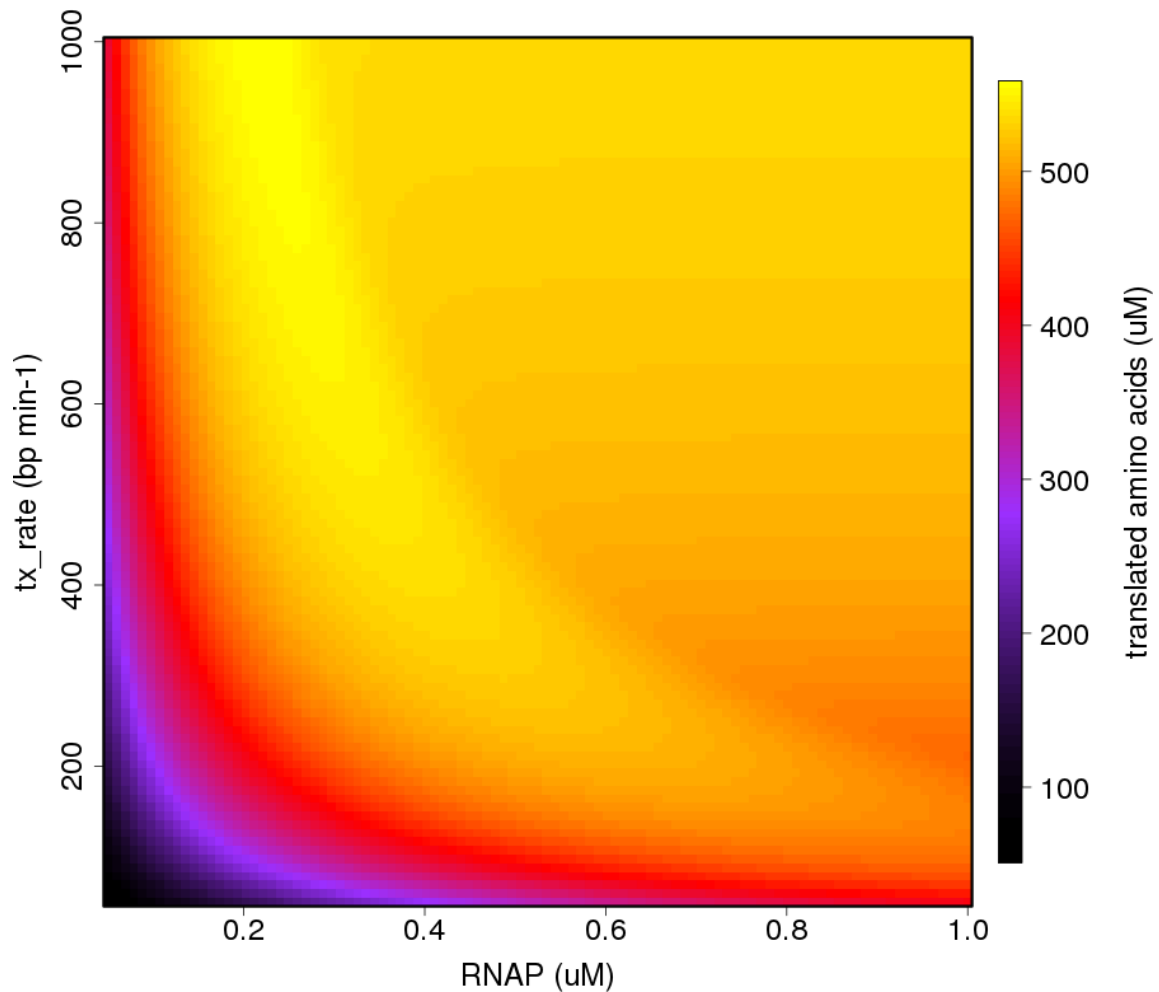

Fig. S32. Modeled total endpoint translated amino acid concentration (both mCherry and GFP) as a function of transcription elongation rate and RNAP concentration at steady state with 40 nM pdh-RiboJ-GFP-MGapt and 40 nM pdh-RiboJ-mCherry plasmid concentrations (Fig. 4 in the main text). For reference, the transcription elongation rate was inferred to be between 705-759 bp min<sup>-1</sup>, while RNAP was inferred to be between 0.079 to 0.08  $\mu$ M (Table S10). For simplicity, the maximum likelihood parameter set was used to simulate the data.

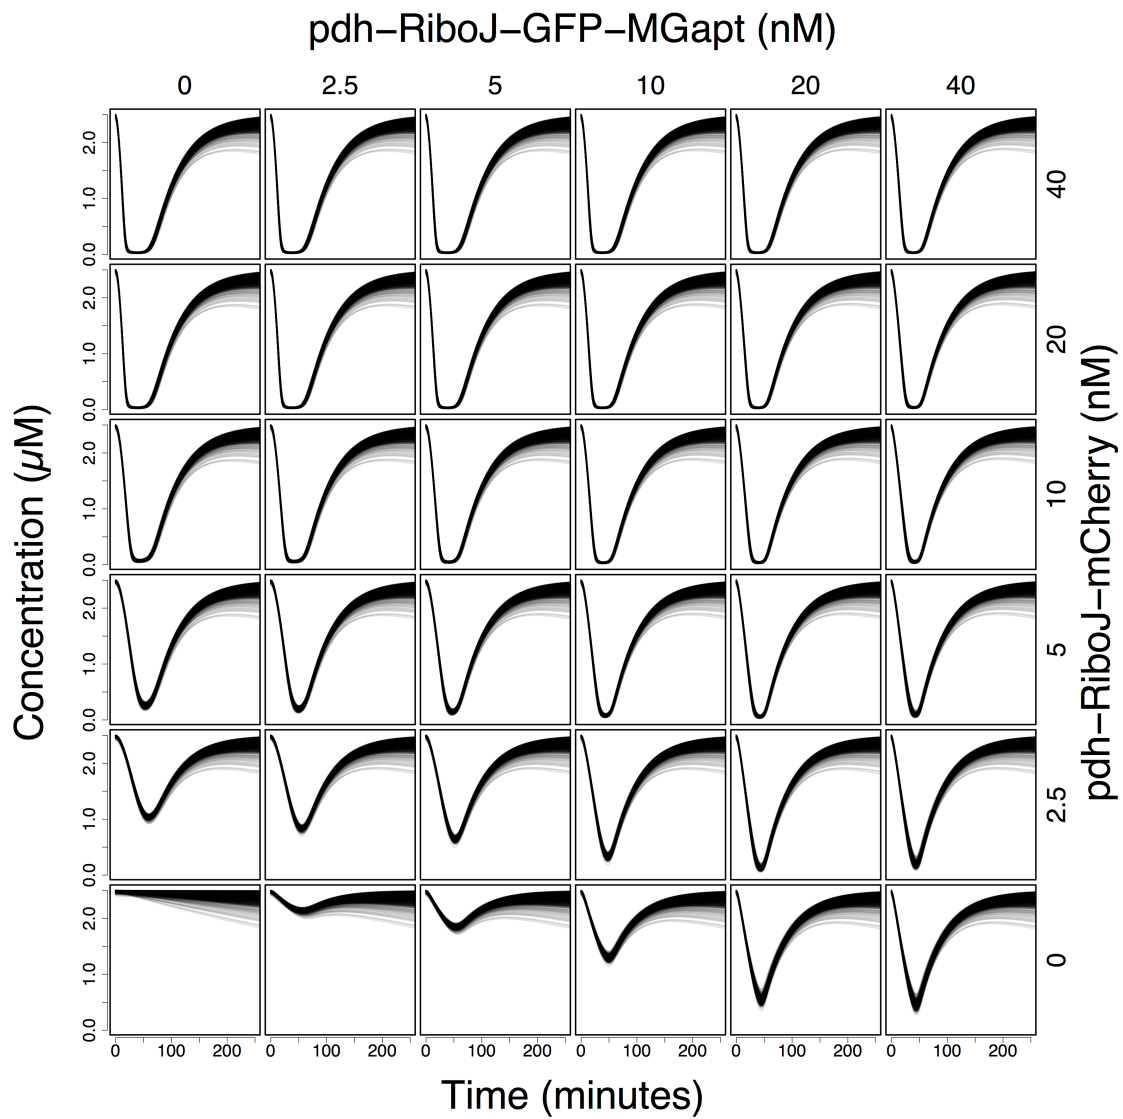

Fig. S33. Predicted free ribosome concentrations from the promoter competition experiment (Fig. 4 in the main text). 500 parameter sets were randomly picked from the posterior distribution (Fig. S28) and simulated trajectories generated for each set.

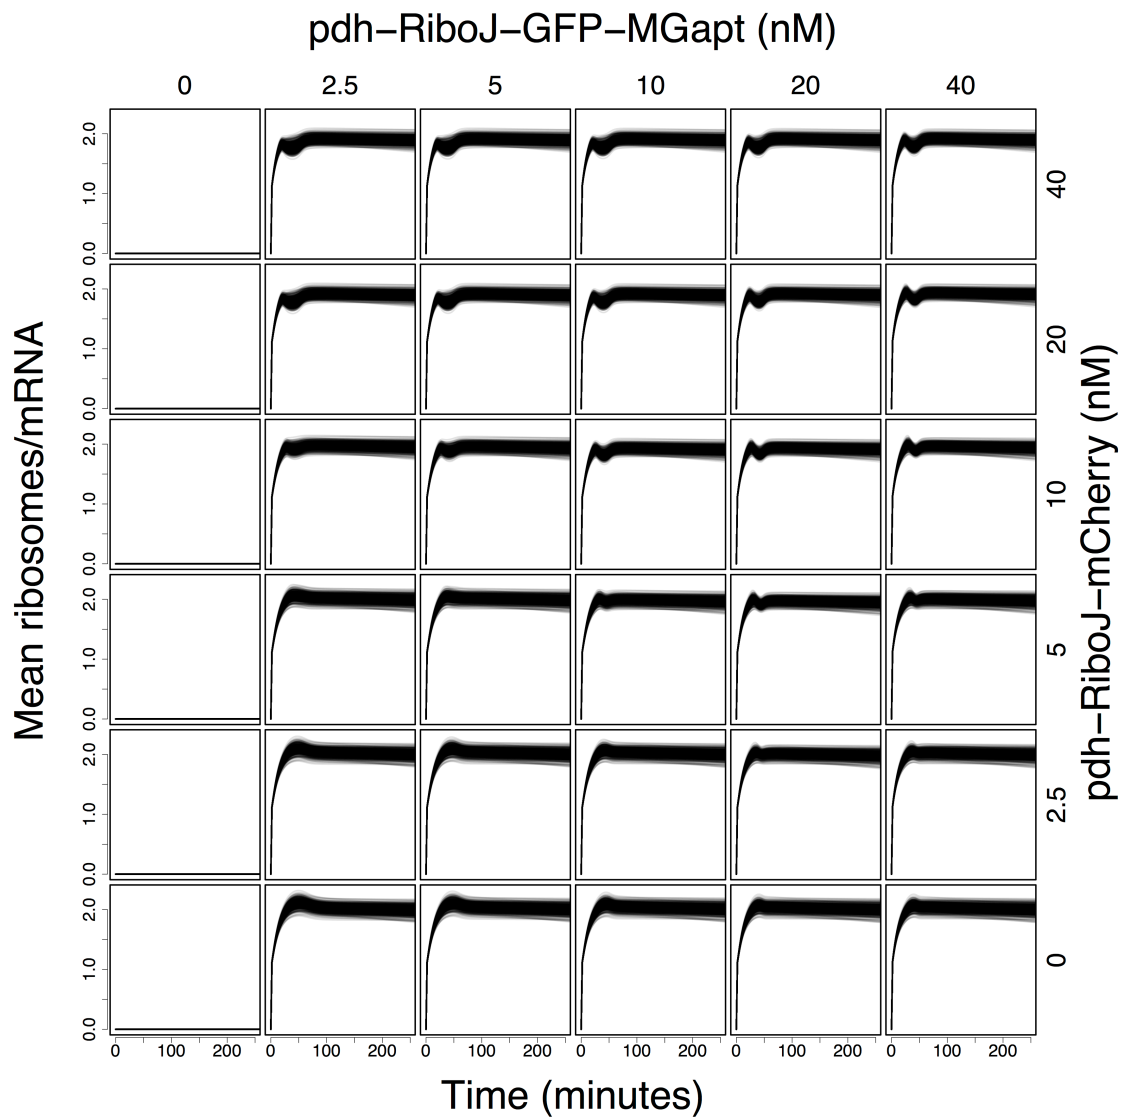

Fig. S34. Predicted mean number of ribosomes per GFP mRNA polysome from the promoter competition experiment (Fig. 4 in the main text). 500 parameter sets were randomly picked from the posterior distribution (Fig. S28) and simulated trajectories generated for each set.

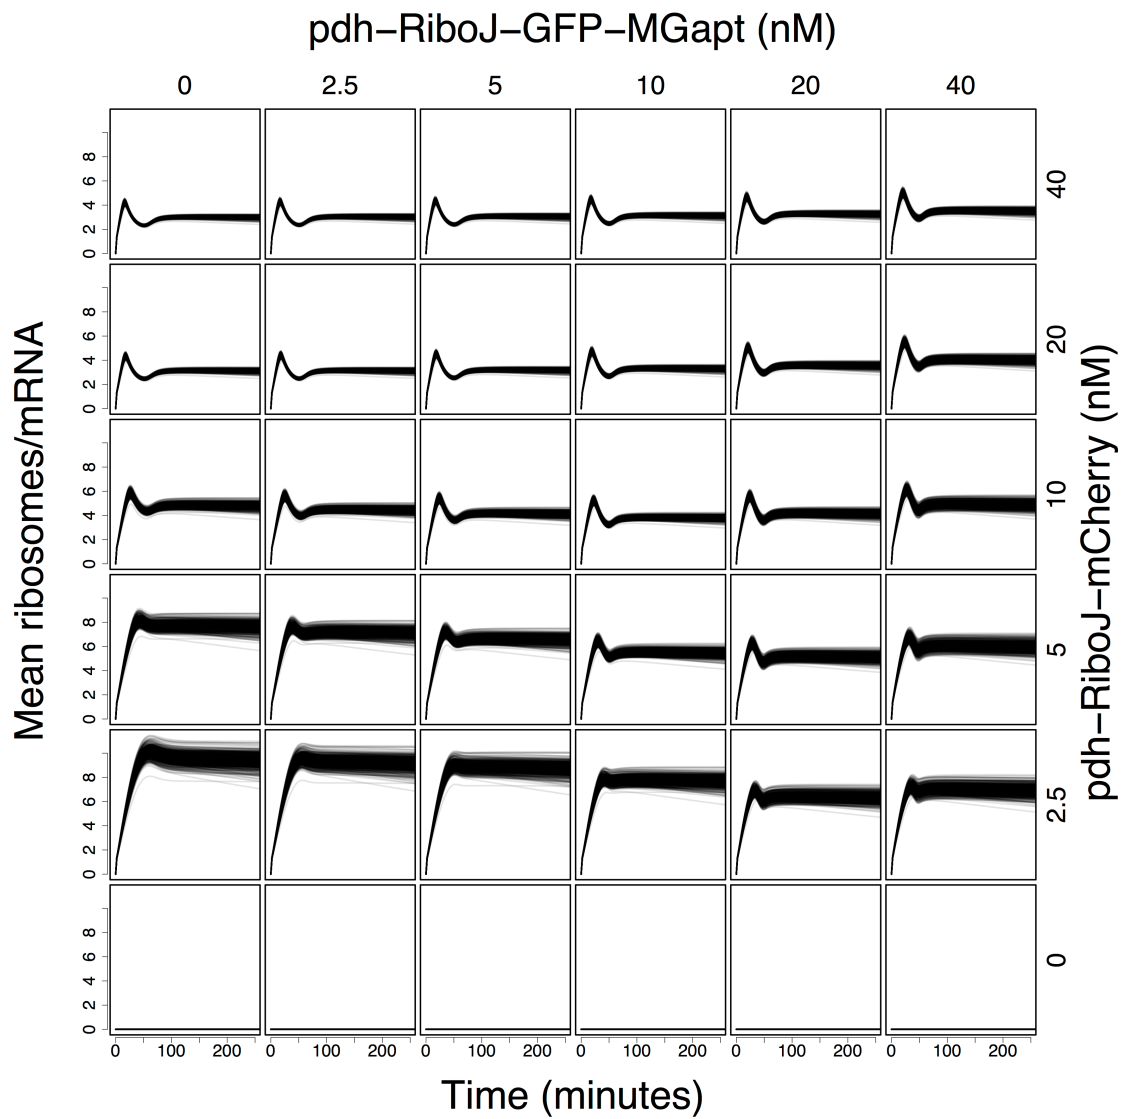

Fig. S35. Predicted mean number of ribosomes per mCherry mRNA polysome from the promoter competition experiment (Fig. 4 in the main text). 500 parameter sets were randomly picked from the posterior distribution (Fig. S28) and simulated trajectories generated for each set.

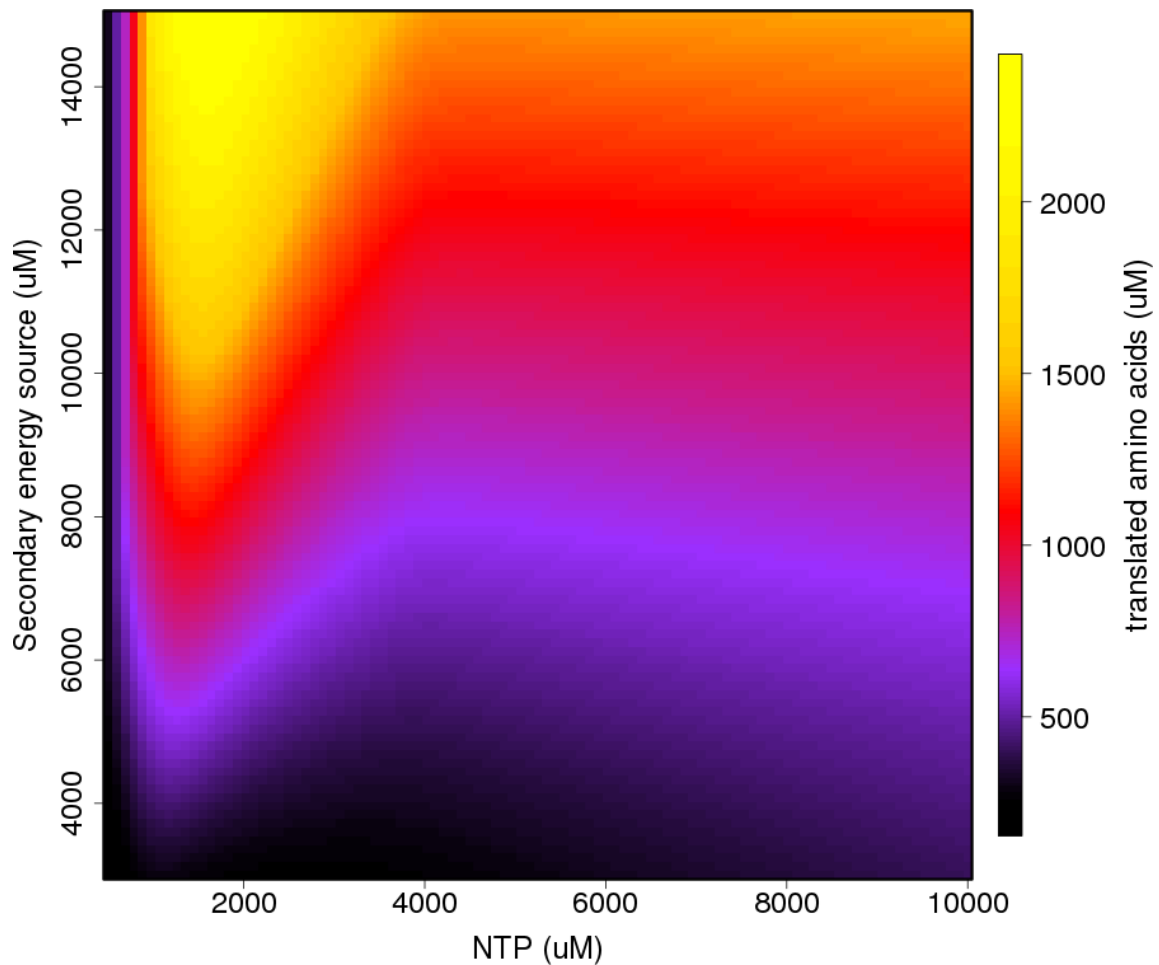

Fig. S36. Modelled total endpoint translated amino acid concentration (both mCherry and GFP) as a function of initial NTP and secondary energy source concentrations at steady state with 40 nM pdh-RiboJ-GFP-MGapt and 0 nM pdh-RiboJ-mCherry plasmid concentrations (Fig. 4 in the main text). For reference, the initial NTP concentration was inferred to be between 4330-5840  $\mu\text{M}$ , while initial concentration of the secondary energy source was inferred to be between 7870-9690  $\mu\text{M}$  (Table S10). For simplicity, the maximum likelihood parameter set was used to simulate the data.

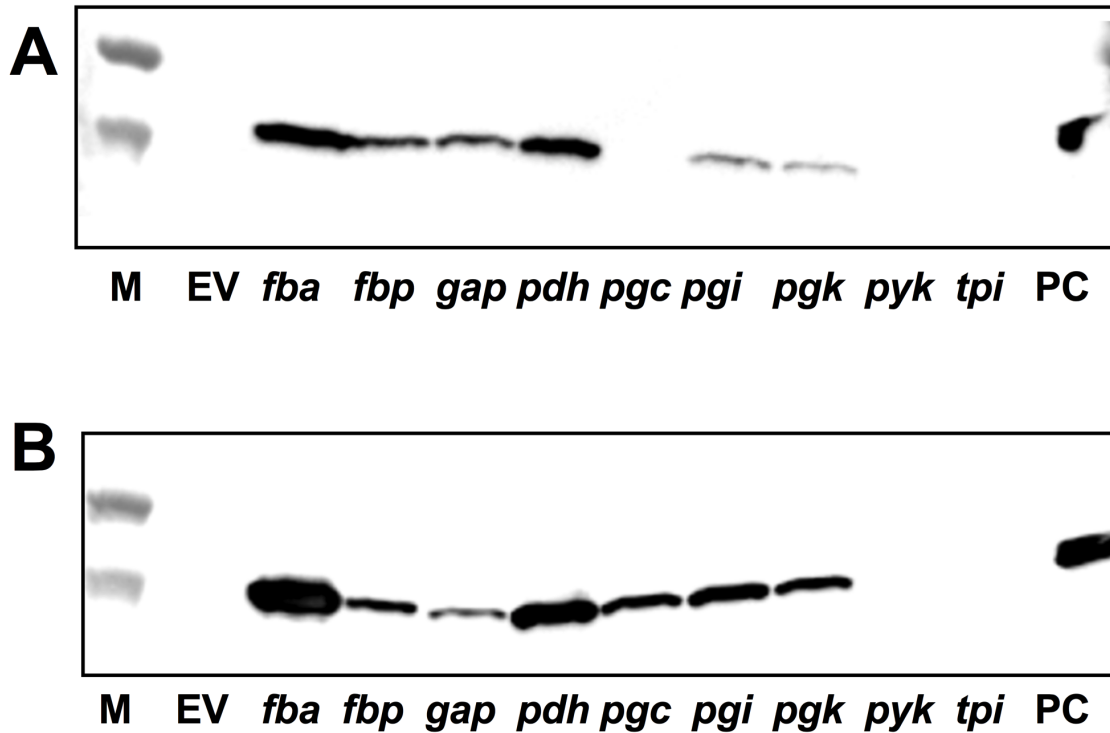

Fig. S37. Western blot of anti-GFP of cell-extracts from cell-free and *in vivo* samples. (A) Cell-free and (B) *in vivo*. For the Western blotting, equivalent samples were loaded onto on SDS-PAGE. Abbreviations: M; PageRuler Plus (ThermoFisher), cropped to 35 and 25 kDa bands, EV; empty vector and PC; positive control of purified His<sub>6</sub>-GFP. Data is representative of a single measurement and verifies protein detection and that there is no degradation. *pyk* and *tpi* samples were not detected from either cell-free or *in vivo* samples. Weak fluorescence was detected for the *pgc* sample in cell-free, but the band was not observed under Western.

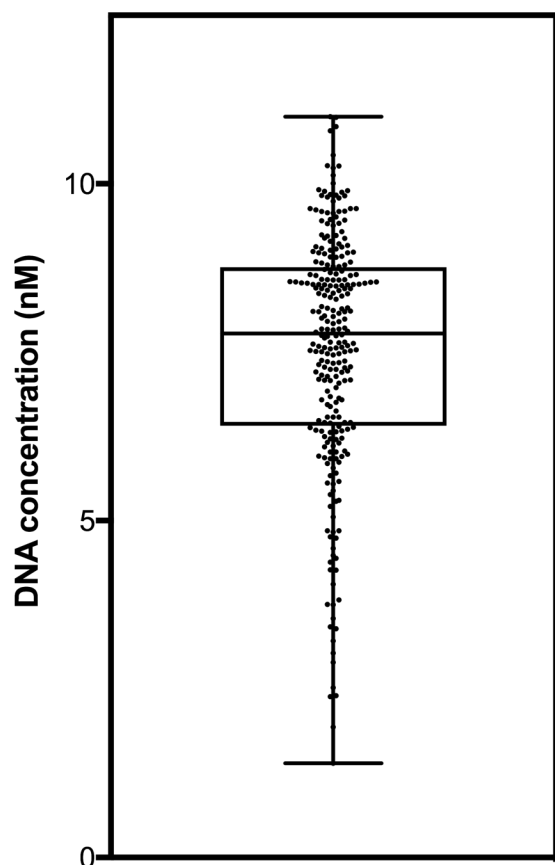

Fig. S38. Box and whisker plot of DNA concentrations from RBS variants in 2  $\mu$ L screening cell-free reactions (Fig. 6B). Data statistics:  $n = 264$ , 1.399 nM minimum, 11.00 nM maximum, 7.78 nM median and  $7.52 \pm 1.8$  nM mean.

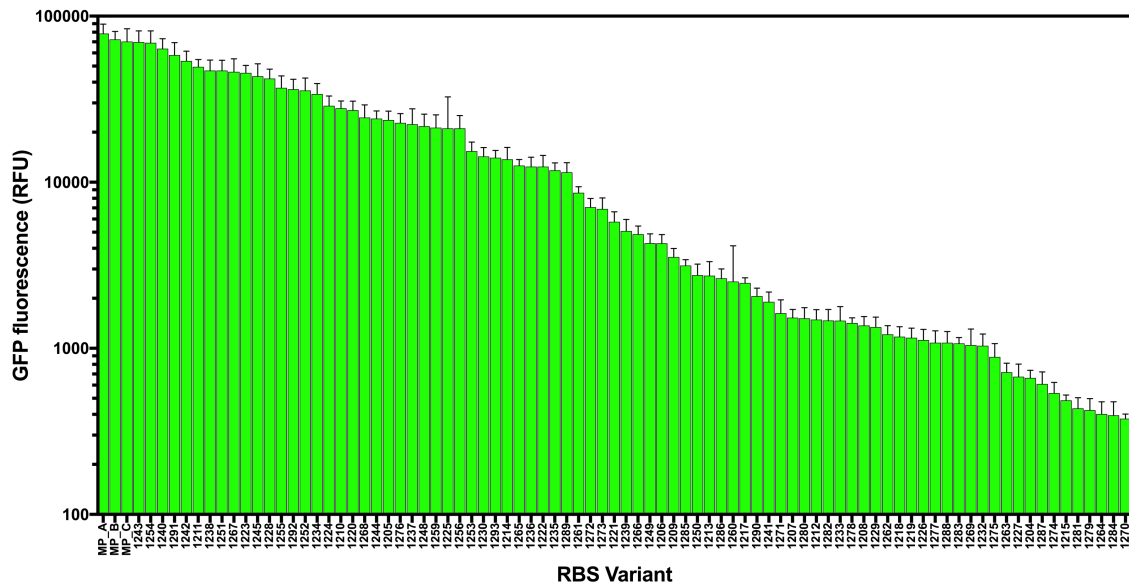

Fig. S39. Ranked RBS activities of selected RBS-4, -5, -6 and -7 variants. Please refer to Table S12-13 for RBS sequence and activities (RFU). For experimental details see *SI Appendix* text.



Table S1. Plasmid list.

| Plasmid name  | Description                                                                                                                                                                               | Source                       |
|---------------|-------------------------------------------------------------------------------------------------------------------------------------------------------------------------------------------|------------------------------|
| pSSBm85       | Optimized xylose inducible promoter $P_{xyIA}^{opt}$ ; $P_{xyIA}^{opt}$ - <i>gfp-stop</i>                                                                                                 | Stammen <i>et al.</i> , 2010 |
| pKMMBm2       | Derived from pSSBm85 carrying a <i>xyIR-mCherry</i> gene encoding the fusion repressor protein XylR-mCherry; $P_{xyIA}^{opt}$ - <i>gfp</i>                                                | Münch <i>et al.</i> , 2015   |
| pKMMBm5       | Derived from pSSBm85 but with the <i>xyIR</i> gene removed; $P_{xyIA}^{opt}$ - <i>gfp</i>                                                                                                 | Münch <i>et al.</i> , 2015   |
| p3STOP1623hp  | Optimized xylose inducible promoter plasmid backbone                                                                                                                                      | Stammen <i>et al.</i> , 2010 |
| pMM1525       | Plasmid for the secretion (signal peptide of the lipase A) of recombinant proteins in <i>B. megaterium</i> using the xylose inducible promoter; $P_{xyIA}$ - <i>sp<sub>lipA</sub>-mcs</i> | Malten <i>et al.</i> , 2007  |
| pRBBm99       | Derivative of p3STOP1623hp lacking all regulatory elements of the xylose inducible promoter                                                                                               | Münch <i>et al.</i> , 2015   |
| pET14b        | Plasmid for the T7 production of recombinant proteins carrying an N-terminal His <sub>6</sub> -tag                                                                                        | Novagen                      |
| pBP-BBa_B0015 | iGEM Bba_B0015 double terminator in EcoFlex backbone                                                                                                                                      | (4)                          |
| pRBBm257      | <i>B. megaterium</i> constitutive promoter regulating the expression of operon <i>bmd_1326-1329</i>                                                                                       | This study                   |
| pRBBm258      | <i>B. megaterium</i> constitutive promoter controlling GFP; $P_{PDH}$ - <i>gfp</i>                                                                                                        | This study                   |
| pRBBm266      | <i>B. megaterium</i> constitutive promoter controlling mCherry; $P_{PDH}$ - <i>mCherry</i>                                                                                                | This study                   |
| pRBBm299      | <i>B. megaterium</i> constitutive promoter controlling codon optimised mCherry; $P_{PDH}$ - <i>mCherry</i>                                                                                | This study                   |
| pSWBm25       | <i>B. megaterium</i> xylose promoter controlling mCherry; $P_{PDH}$ - <i>mCherry</i>                                                                                                      | This study                   |
| pRBec2        | pET14b- <i>xyIR</i>                                                                                                                                                                       | This study                   |
| pSJM579       | pTU1-A-T7-PET_RBS-His <sub>6</sub> -GFP-Bba_B0015                                                                                                                                         | This study                   |
| pSJM673       | pKMMBm5 encoding the malachite green aptamer (MGapt)                                                                                                                                      | This study                   |
| pSJM687       | pTU1-A-T7-PET_RBS-His <sub>6</sub> -mCherry-Bba_B0015                                                                                                                                     | This study                   |
| pSJM734       | pTU1-A-T7-PET_RBS-GFP-MGapt-Bba_B0015                                                                                                                                                     | This study                   |

Table S2. PCR oligonucleotides (restriction sites highlighted).

| Oligo name    | Sequence (5'-3')                                                                                   | Template             | Ref  |
|---------------|----------------------------------------------------------------------------------------------------|----------------------|------|
| MGapt_F_SphI  | CAC <b>GCATGC</b> TCGATATAGCAATACGGATCCCGACTGGC<br>GAGAGCCAGGTAACGAATGGATCCCCAGGCATCAAATA<br>AAACG | pBP-BBa_B0015        | (4)  |
| MGapt_R_AgeI  | GTG <b>ACCGGT</b> AACATATAAACGCAGAAAGG                                                             |                      |      |
| RB128_F_BamHI | TATCA <b>GGATCC</b> TGTTATTATTCAAATTGCAG                                                           | pMM1525              | (3)  |
| RB129_R_BamHI | TATCA <b>GGATCC</b> CTAACTTATAGGGGTAACAC                                                           |                      |      |
| RB216_AflII_F | TATCA <b>CTTAAG</b> GAAGGCCTGTGAAGTTTAC                                                            | <i>B. megaterium</i> | (26) |
| RB217_SpeI_R  | TATCA <b>ACTAGT</b> CATCTAAGTCACCTCTTCC                                                            | DSM319 gDNA          |      |
| RB233_SpeI_F  | ACAT <b>ACTAGT</b> AAGGGCGAGGAGGATAAC                                                              |                      | (2)  |
| RB234_SphI_R  | ACAT <b>GCATCC</b> TTACTTGTACAGCTCGTC                                                              | pKMMBm2              |      |
| SW55_BglI_F   | ATCA <b>AGATCT</b> ATGGTGAGCAAGGGCGAG                                                              |                      |      |
| SW56_EahI_R   | ATCA <b>CGGCCG</b> TTACTTGTACAGCTCG                                                                |                      |      |

Table S3. EcoFlex PCR oligonucleotides (restriction sites highlighted).

| Oligo name                                                                                                                                                                         | Sequence (5'-3')                                                  | Template    | Ref       |
|------------------------------------------------------------------------------------------------------------------------------------------------------------------------------------|-------------------------------------------------------------------|-------------|-----------|
| <b>Shuttle vector backbone</b>                                                                                                                                                     |                                                                   |             |           |
| Tet_RebB_F;                                                                                                                                                                        | A <b>GGTCTC</b> A <b>TCGA</b> CCACCTGACGTCTAAGAAACC               | pMM1525     | (3)       |
| Tet_RebB_R                                                                                                                                                                         | A <b>GGTCTC</b> A <b>AAACA</b> CCTTCCTTAAGGAACGTACAGACG           |             |           |
| RebB_Bsal_X<br>(Bsal mutagenesis)                                                                                                                                                  | CTTTTCTCTCCAT <b>GGTCT</b> GACTTTTCCACTTTTGTCT<br>TG              |             |           |
| <b>GFP_MGapt transcript</b>                                                                                                                                                        |                                                                   |             |           |
| GFP_MGapt_F                                                                                                                                                                        | A <b>GGTCTC</b> A <b>CATA</b> TGACTAGTTCGAAGATCTGG                | pSJM673     | This work |
| GFP_MGapt_R                                                                                                                                                                        | A <b>GGTCTC</b> A <b>TCGA</b> CTTGACC GGTAACATATAAACG             |             |           |
| <i>B. megaterium</i> DSM319 RNA polymerase Sigma A subunit – <i>rpoD</i>                                                                                                           |                                                                   |             |           |
| RpoD_Bsal_F                                                                                                                                                                        | A <b>GGTCTC</b> A <b>CATA</b> TGGCTGAAAAATCAGCTCAATC              | Genomic DNA | This work |
| RpoD_Bsal_R                                                                                                                                                                        | A <b>GGTCTC</b> A <b>TCGA</b> TTATTCTAAGAAATCTTTAAACGT<br>TTGCTTC |             |           |
| mCherry codon optimised for <i>B. megaterium</i> DSM319 – synthesised by Life Technologies™ Geneart™ (Regensburg, Germany) and cloned into pRBBm299 separately with BglII and SphI |                                                                   |             |           |
| mCherry_Bm_NdeI_F                                                                                                                                                                  | CAC <b>CATATC</b> GTATCTAAAGGTGAAGAAGATAATATG<br>G                | pRBBm299    | This work |
| mCherry_Bm_BamHI_R                                                                                                                                                                 | CAC <b>CGATCC</b> TTATTTATATAATTCATCCATACCACCT<br>GTAGAATG        |             |           |
| <b>Glycolysis and gluconeogenesis promoters – template <i>B. megaterium</i> genomic DNA</b>                                                                                        |                                                                   |             |           |
| tpi_Bsal_F                                                                                                                                                                         | A <b>GGTCTC</b> A <b>CTAT</b> GTTTATGTTTCAGTAAGACGGAG             |             |           |
| tpi_Bsal_R                                                                                                                                                                         | A <b>GGTCTC</b> A <b>GTAC</b> TTTGTTTATTGTGGGTTTTCCCTTC           |             |           |
| pyk_Bsal_F                                                                                                                                                                         | A <b>GGTCTC</b> A <b>CTAT</b> TAAAAGGGCTGTCTCTTAGG                |             |           |
| pyk_Bsa_R                                                                                                                                                                          | A <b>GGTCTC</b> A <b>GTAC</b> TTTTAATGTAGGATGCCCATTTTC            |             |           |
| pgk_Bsal_F                                                                                                                                                                         | A <b>GGTCTC</b> A <b>CTAT</b> GAATAACTTAAAATTCGCTTC               |             |           |
| pgk_Bsal_R                                                                                                                                                                         | A <b>GGTCTC</b> A <b>GTAC</b> TTAAGTATTATGGTACTAAGCAAGTAGG        |             |           |
| pgi_Bsal_F                                                                                                                                                                         | A <b>GGTCTC</b> A <b>CTAT</b> ACGCTGGAATTTCCATAC                  |             |           |
| pgi_Bsal_R                                                                                                                                                                         | A <b>GGTCTC</b> A <b>GTAC</b> ATTAAAATATCTTTATTTTCACTTTATCG       |             |           |
| pgc_Bsal_F                                                                                                                                                                         | A <b>GGTCTC</b> A <b>CTAT</b> AAAATGAGGCTGAGACAAAAG               |             |           |
| pgc_Bsal_R                                                                                                                                                                         | A <b>GGTCTC</b> A <b>GTAC</b> ATTAGGCAATTAGTTCCCTG                |             |           |
| pdh_Bsal_F                                                                                                                                                                         | A <b>GGTCTC</b> A <b>CTAT</b> GAAGGCCTGTGAAGTTTACAG               |             |           |
| pdh_Bsal_R                                                                                                                                                                         | A <b>GGTCTC</b> A <b>GTAC</b> TTTCATTTAAGCCGTATAAATTCATTTTAC      |             |           |
| fbp_Bsal_F                                                                                                                                                                         | A <b>GGTCTC</b> A <b>CTAT</b> GTTTCACAAATCACTACATTTCG             |             |           |
| fbp_Bsal_R                                                                                                                                                                         | A <b>GGTCTC</b> A <b>GTAC</b> TTTCAACGTTCAACATTTAGTATAATC         |             |           |
| fba_Bsal_F                                                                                                                                                                         | A <b>GGTCTC</b> A <b>CTAT</b> GGTTTTGGTAGGGTTTTCATC               |             |           |
| fba_Bsal_R                                                                                                                                                                         | A <b>GGTCTC</b> A <b>GTAC</b> TTAAAATCAACCTTAGATTAGATGC           |             |           |

Table S4. Sequencing oligonucleotides.

| Sequencing     |                            |                                   |
|----------------|----------------------------|-----------------------------------|
| pRBBm258_for   | GTAAATGCATTGACGAACTGTTTTAG | pRBBm258-MGapt                    |
| pMM1520_for    | ATGATGAGATAAAGTTAGTTTATTGG | pKMMBm5-MGapt                     |
| pMM1520_rev    | GTTTGCGCATTACAGTTCTCC      | pRBBm258-MGapt /<br>pKMMBm5-MGapt |
| TetA_RebB_seq1 | GAATATAATGGGCTATCATTCCACC  | pBP-TetA_RebB                     |
| TetA_RebB_seq2 | CAATGTGGAATTGGGAACGG       | pBP-TetA_RebB                     |

Table S5. Comparison of cell-free and live cell systems using *E. coli* data collated from several studies and presented by Garamella *et al* (27).

|                                         | <i>E. coli</i> – from Garamella <i>et al</i> (27) |           | <i>B. megaterium</i> – this study |                                         |
|-----------------------------------------|---------------------------------------------------|-----------|-----------------------------------|-----------------------------------------|
| Parameter                               |                                                   |           |                                   |                                         |
|                                         | <i>in vivo</i>                                    | Cell-free | <i>in vivo</i>                    | Cell-free (low-high range)              |
| Cell-size<br>l × w × d (μm)             | 1 × 1 × 0.5                                       | NA        | 4-8 (variable) × 1.5 × 1.5        | NA                                      |
| Protein concentration<br>(mg/ml)        | 200-320                                           | 10        | n.d.                              | 10                                      |
|                                         | <i>in vivo</i>                                    | Cell-free | <i>in vivo</i>                    | Cell-free                               |
| <b>Transcription</b>                    |                                                   |           |                                   |                                         |
| RNA polymerase apo (nM)                 | 1900                                              | 60-75     | n.d.                              | 285-628 (2 s.f)                         |
| Sigma σ (nM)                            | 730                                               | < 35      | N/A                               | N/A                                     |
| Sigma A (nM)                            | N/A                                               | N/A       | n.d.                              | 14-96 (2 s.f)                           |
| mRNA elongation rate (nuc/s)            | 39-55                                             | > 5       | n.d.                              | 5.81-5.87                               |
| mRNA mean lifetime (min)                | 9.8                                               | 16-17     | n.d.                              | 15.59                                   |
| <b>Translation</b>                      |                                                   |           |                                   |                                         |
| 30S+50S (μM)<br>[active fraction]       | 46.5                                              | < 2.3     | n.d.                              | 1.43-2.48 (from model)                  |
| 30S (μM) [total]                        | n.d.                                              | n.d.      | n.d.                              | 1.1-3.6 (LC-MS)                         |
| 50S (μM) [total]                        | n.d.                                              | n.d.      | n.d.                              | 1.1-3.7 (LC-MS)                         |
| tRNA synthetase (nM) [total]            | n.d.                                              | n.d.      | n.d.                              | 86-397 (LC-MS)                          |
| Peptide chain elongation rate<br>(AA/s) | 18                                                | > 1.5     | n.d.                              | 0.03-0.66 (from model –<br>mCherry-GFP) |

n.d. – not determined

N/A – not applicable

Table S6. Preparation of amino acids for 50 mL of stock solution.

| Amino Acid                | MW     | mg   | mM |
|---------------------------|--------|------|----|
| L-Alanine                 | 89.09  | 26.7 | 6  |
| L-Arginine hydrochloride  | 210.66 | 63.2 | 6  |
| L-Asparagine              | 132.12 | 39.6 | 6  |
| L-Aspartic acid           | 133.10 | 39.9 | 6  |
| L-Cysteine                | 121.16 | 36.4 | 6  |
| L-Glutamic acid           | 147.13 | 44.1 | 6  |
| L-Glutamine               | 146.14 | 43.8 | 6  |
| Glycine                   | 75.07  | 22.5 | 6  |
| L-Histidine hydrochloride | 191.62 | 57.5 | 6  |
| L-Isoleucine              | 131.18 | 39.4 | 6  |
| L-Leucine                 | 131.17 | 32.8 | 5  |
| L-Lysine hydrochloride    | 182.65 | 54.8 | 6  |
| L-Methionine              | 149.21 | 44.8 | 6  |
| L-Phenylalanine           | 165.19 | 49.6 | 6  |
| L-Proline                 | 115.13 | 34.5 | 6  |
| L-Serine                  | 105.09 | 31.5 | 6  |
| L-Threonine               | 119.12 | 35.7 | 6  |
| L-Tryptophan              | 204.23 | 61.3 | 6  |
| L-Tyrosine                | 181.19 | 54.4 | 6  |
| L-Valine                  | 117.15 | 35.2 | 6  |

Table S7. LC-MS/MS of singly charged fragment (y) ions for the targeted QconCAT and Sigma A peptides.

| Protein                   | No. | Peptide              | y18      | y17      | y16      | y15      | y14      | y13      | y12      | y11      | y10      | y9       | y8       | y7       | y6       | y5       | y4       | y3       | y2       | y1       |
|---------------------------|-----|----------------------|----------|----------|----------|----------|----------|----------|----------|----------|----------|----------|----------|----------|----------|----------|----------|----------|----------|----------|
| 30S ribosomal protein S4  | 1   | ISEYGLQLQEK          |          |          |          |          |          |          |          |          | 1194.6   | 1107.568 | 978.5255 | 815.4621 | 758.4407 | 645.3566 | 517.298  | 404.214  | 276.1554 | 147.1128 |
| 30S ribosomal protein S4  | 2   | EALEVNNFVPDYLTVDAAEK | 2037.018 | 1965.98  | 1852.896 | 1723.854 | 1624.785 | 1510.742 | 1396.7   | 1249.631 | 1150.563 | 1053.51  | 938.4829 | 775.4196 | 662.3355 | 561.2879 | 462.2195 | 347.1925 | 276.1554 | 147.1128 |
| 30S ribosomal protein S7  | 1   | AFDLVQER             |          |          |          |          |          |          |          |          |          |          |          | 906.468  | 759.3995 | 644.3726 | 531.2885 | 432.2201 | 304.1615 | 175.119  |
| 30S ribosomal protein S7  | 2   | WLVNYAR              |          |          |          |          |          |          |          |          |          |          |          |          | 735.4148 | 622.3307 | 523.2623 | 409.2194 | 246.1561 | 175.119  |
| 50S ribosomal protein L2  | 1   | SAGTSAQVLGK          |          |          |          |          |          |          |          |          | 931.5207 | 860.4836 | 803.4621 | 702.4145 | 615.3824 | 544.3453 | 416.2867 | 317.2183 | 204.1343 | 147.1128 |
| 50S ribosomal protein L2  | 2   | VATIEYDPNR           |          |          |          |          |          |          |          |          |          | 1078.516 | 1007.479 | 906.4316 | 793.3475 | 664.3049 | 501.2416 | 386.2146 | 289.1619 | 175.119  |
| 50S ribosomal protein L4  | 1   | AQDNSIVVLEALSFDAPK   |          | 1845.959 | 1717.901 | 1602.874 | 1488.831 | 1401.799 | 1288.715 | 1189.646 | 1090.578 | 977.4938 | 848.4512 | 777.4141 | 664.3301 | 577.298  | 430.2296 | 315.2027 | 244.1656 | 147.1128 |
| 50S ribosomal protein L4  | 2   | GGGVVFGPVPR          |          |          |          |          |          |          |          |          | 984.5625 | 927.5411 | 870.5196 | 771.4512 | 672.3828 | 525.3144 | 468.2929 | 371.2401 | 272.1717 | 175.119  |
| alanyl-tRNA synthetase    | 1   | VEGLLEEIR            |          |          |          |          |          |          |          |          |          |          | 958.5204 | 829.4778 | 772.4563 | 659.3723 | 546.2882 | 417.2456 | 288.203  | 175.119  |
| alanyl-tRNA synthetase    | 2   | IVSESGIGAGTR         |          |          |          |          |          |          |          | 1033.527 | 934.4588 | 847.4268 | 718.3842 | 631.3522 | 574.3307 | 461.2467 | 404.2252 | 333.1881 | 276.1666 | 175.119  |
| RNAP - beta subunit       | 1   | LAETLVDPETGEIIAEK    |          |          | 1714.875 | 1643.837 | 1514.795 | 1413.747 | 1300.663 | 1201.595 | 1086.568 | 989.515  | 860.4724 | 759.4247 | 702.4032 | 573.3606 | 460.2766 | 347.1925 | 276.1554 | 147.1128 |
| RNAP - beta subunit       | 2   | DIPNVGEDALR          |          |          |          |          |          |          |          |          | 1083.579 | 970.4952 | 873.4425 | 759.3995 | 660.3311 | 603.3097 | 474.2671 | 359.2401 | 288.203  | 175.119  |
| methionyl-tRNA synthetase | 1   | VAQVTQVEPVK          |          |          |          |          |          |          |          |          | 1098.615 | 1027.578 | 899.5197 | 800.4512 | 699.4036 | 571.345  | 472.2766 | 343.234  | 246.1812 | 147.1128 |
| methionyl-tRNA synthetase | 2   | EVPFGSDGVFTPEAFVER   |          | 1853.907 | 1754.838 | 1657.786 | 1510.717 | 1453.696 | 1366.664 | 1251.637 | 1194.615 | 1095.547 | 948.4785 | 847.4308 | 750.3781 | 621.3355 | 550.2984 | 403.23   | 304.1615 | 175.119  |
| Sigma A                   | 1   | GVLTYEEIAER          |          |          |          |          |          |          |          |          | 1222.631 | 1123.563 | 1010.479 | 909.4312 | 746.3679 | 617.3253 | 488.2827 | 375.1987 | 304.1615 | 175.119  |
| Sigma A                   | 2   | EQLEDVLDLTDR         |          |          |          |          |          |          | 1417.717 | 1289.658 | 1176.574 | 1047.532 | 932.5047 | 833.4363 | 720.3523 | 605.3253 | 504.2776 | 391.1936 | 290.1459 | 175.119  |

Table S8. Peptide ions and retention times for calibration and quantitation in cell-extracts.

| <b>Protein</b>            | <b>Peptide</b>      | <b>Retention time (min)</b> | <b>Charge state</b> | <b>14N precursor m/z</b> | <b>15N precursor m/z</b> |
|---------------------------|---------------------|-----------------------------|---------------------|--------------------------|--------------------------|
| 30S ribosomal protein S4  | ISEYGLQLQEK         | 6.10                        | 2                   | 654.346                  | 661.325                  |
| 30S ribosomal protein S4  | EALEVNNFVPDYLTVDAEK | 8.98                        | 2                   | 1083.534                 | 1094.501                 |
| 30S ribosomal protein S7  | AFDLVQER            | 5.95                        | 2                   | 489.256                  | 495.239                  |
| 30S ribosomal protein S7  | WLVNYAR             | 6.47                        | 2                   | 461.251                  | 467.233                  |
| 50S ribosomal protein L2  | SAGTSAQVLGK         | 3.72                        | 2                   | 509.780                  | 516.261                  |
| 50S ribosomal protein L2  | VATIEYDPNR          | 4.80                        | 2                   | 589.296                  | 596.276                  |
| 50S ribosomal protein L4  | AQDNSIVVLEALSFDAPK  | 9.62                        | 2                   | 959.002                  | 969.471                  |
| 50S ribosomal protein L4  | GGGVVFGPVPR         | 6.22                        | 2                   | 521.296                  | 528.275                  |
| alanyl-tRNA synthetase    | VEGLLEEIR           | 7.32                        | 2                   | 529.298                  | 535.281                  |
| alanyl-tRNA synthetase    | IVSESGIGAGTR        | 4.18                        | 2                   | 573.809                  | 581.287                  |
| RNAP - beta subunit       | LAETLVDPETGEIIAEK   | 7.43                        | 2                   | 914.483                  | 923.457                  |
| RNAP - beta subunit       | DIPNVGEDALR         | 6.34                        | 2                   | 599.807                  | 607.285                  |
| methionyl-tRNA synthetase | VAQVTQVEPVK         | 4.62                        | 2                   | 599.346                  | 606.325                  |
| methionyl-tRNA synthetase | EVPFGSDGVFTPEAFVER  | 9.29                        | 2                   | 991.978                  | 1002.447                 |
| Sigma A                   | GVLTYEEIAER         | 6.55                        | 2                   | 640.330                  | 647.310                  |
| Sigma A                   | EQLEDVLDLTLDR       | 9.13                        | 2                   | 773.883                  | 782.358                  |



Table S9 – Model parameters and inferred values of the xylose-inducible promoter system in cell-free (see Main text Figs 2 & 3, and S18-22).

| Parameter name     | Units                | Description                                                                      | Notes                                                                                                                                                                                                                                                                                                                                                                                              | Inferred values (DNA titration only) |        |              | Inferred values (varying DNA/XylR/xylose) |        |              |
|--------------------|----------------------|----------------------------------------------------------------------------------|----------------------------------------------------------------------------------------------------------------------------------------------------------------------------------------------------------------------------------------------------------------------------------------------------------------------------------------------------------------------------------------------------|--------------------------------------|--------|--------------|-------------------------------------------|--------|--------------|
|                    |                      |                                                                                  |                                                                                                                                                                                                                                                                                                                                                                                                    | 5% quantile                          | Median | 95% quantile | 5% quantile                               | Median | 95% quantile |
| tl_rate_gfp        | aa min <sup>-1</sup> | translation elongation rate                                                      | Previous estimates for translation elongation rate are about 18 aa/s (18×60 = 1080 aa/min) <i>in vivo</i> and 1.5 aa/s (90 aa/min) <i>in vitro</i> (28). It is highly likely that this will vary depending on codon usage in the coding sequence.                                                                                                                                                  | 5.43                                 | 5.87   | 6.31         | 5.44                                      | 5.81   | 6.12         |
| tl_escape_rate_gfp | min <sup>-1</sup>    | translation initiation rate                                                      | This is the overall translation initiation rate defined to mean the binding of the 50s subunit to the already formed 30s:mRNA complex followed by GTP hydrolysis and Pi release.<br><br>Previously, 50S binding was found to be fast, GTP hydrolysis rate about 30 s <sup>-1</sup> , however, Pi release is about 1.5 s <sup>-1</sup> (90 min <sup>-1</sup> ) and dominates the overall rate (29). | 1.16                                 | 1.21   | 1.26         | 1.25                                      | 1.28   | 1.32         |
| tx_rate            | bp min <sup>-1</sup> | transcription elongation rate                                                    | Previously, mRNA elongation rate in cell-free has been estimated at about 3 bp/sec (180 bp/min) (30), but is estimated to be much faster in cells at up to 90 bp/sec (5400 bp/min) (31).                                                                                                                                                                                                           | 554                                  | 616    | 688          | 488                                       | 529    | 572          |
| tx_escape_rate_gfp | min <sup>-1</sup>    | promoter escape rate                                                             | This is the composite rate constant of the rate limiting step in transcription initiation. Going by the terminology in Hsu LM, 2002 paper (32), this is likely dominated by either either be k <sub>2</sub> or k <sub>E</sub> .<br><br>k <sub>E</sub> half life values can range from 5 s (8.316 min <sup>-1</sup> ) to 10 min (0.0693 min <sup>-1</sup> ).                                        | 2.67                                 | 2.81   | 2.94         | 2.84                                      | 2.94   | 3.05         |
| ma_deg_rate_gfp    | min <sup>-1</sup>    | mRNA degradation rate                                                            | mRNA half-life has been previously found to be around 5 min (0.14 min <sup>-1</sup> ) for <i>E. coli</i> : 21 min (0.032 min <sup>-1</sup> ) for <i>S. cerevisiae</i> : 600 min (0.0012 min <sup>-1</sup> ) for human HepG2/Bud8 cells, so rate constant is 0.693 / 5 = 0.1386 min <sup>-1</sup> (32, 33).                                                                                         | 0.0302                               | 0.0321 | 0.0342       | 0.0248                                    | 0.0261 | 0.0273       |
| gfp_mat_rate       | min <sup>-1</sup>    | GFP+ maturation rate                                                             | Wildtype GFP is estimated to have a maturation rate of 0.0186 min <sup>-1</sup> , while the fastest folding GFP, GFPmut3 is estimated to have a rate of 0.132 min <sup>-1</sup> . GFP+, used in this study, is synonymous to GFPuv3 which has been estimated to have a maturation rate of 0.066 min <sup>-1</sup> (34).                                                                            | 0.0576                               | 0.0603 | 0.0632       | 0.0573                                    | 0.0594 | 0.0615       |
| ntp_deg_rate       | min <sup>-1</sup>    | NTP degradation rate                                                             | NTP degradation to NMP by non-productive NTPase side-reactions                                                                                                                                                                                                                                                                                                                                     | 0.0437                               | 0.0459 | 0.048        | 0.0413                                    | 0.0428 | 0.0444       |
| Km_ntp_map         | μM                   | Michaelis constant for NTP binding RNAP in transcription reactions               |                                                                                                                                                                                                                                                                                                                                                                                                    | 4550                                 | 4880   | 4990         | 4430                                      | 4660   | 4870         |
| Km_ntp_ribo        | μM                   | Michaelis constant for NTP binding the ribosome in translation reactions         |                                                                                                                                                                                                                                                                                                                                                                                                    | 40.8                                 | 53.4   | 67.1         | 43.8                                      | 53.7   | 63.8         |
| Km_aa_ribo         | μM                   | Michaelis constant for amino acids binding the ribosome in translation reactions |                                                                                                                                                                                                                                                                                                                                                                                                    | 248                                  | 2500   | 4750         | 965                                       | 3100   | 4720         |
| koff_prom_gfp      | min <sup>-1</sup>    | koff for the RNAP:promoter complex                                               | Previous work suggests that KM <sub>dna</sub> is likely fall between 0.001-0.2 μM (35). If initial binding of RNAP to the promoter is assumed to be in rapid equilibrium so that kon can be set to an arbitrarily high value (1000000 uM min <sup>-1</sup> ), koff would lie in the range 1000 min <sup>-1</sup> to 200000 min <sup>-1</sup> .                                                     | 100                                  | 101    | 106          | 100                                       | 103    | 106          |
| koff_mrna_gfp      | min <sup>-1</sup>    | koff for the ribosome:mRNA complex                                               | Previous work suggests that KM <sub>mRNA</sub> is likely to range from 0.003 to 0.3 uM. If initial binding of the ribosome to the RBS is assumed to be in rapid equilibrium such that kon can be set to an arbitrarily high value (1000000 uM min <sup>-1</sup> ), koff would lie in the range 3000 to 300000 min <sup>-1</sup> .                                                                  | 1250                                 | 2000   | 2810         | 3000                                      | 3640   | 4300         |
| regen_rate         | μM min <sup>-1</sup> | Vmax for the NMP + lInd_nrg_src ->NTP reaction                                   |                                                                                                                                                                                                                                                                                                                                                                                                    | 33.9                                 | 39.2   | 42.9         | 29                                        | 31.2   | 33.8         |
| Km_lInd_nrg_src    | μM                   | Michaelis constant for lInd_nrg_src in NTP regeneration                          |                                                                                                                                                                                                                                                                                                                                                                                                    | 3320                                 | 4520   | 4960         | 444                                       | 630    | 883          |

|                             |                   |                                                                       |                                                                   |        |        |        |         |         |        |
|-----------------------------|-------------------|-----------------------------------------------------------------------|-------------------------------------------------------------------|--------|--------|--------|---------|---------|--------|
|                             |                   | reaction                                                              |                                                                   |        |        |        |         |         |        |
| Km_nmp_regen                | μM                | Michaelis constant for NMP in NTP regeneration reaction               |                                                                   | 2.82   | 44     | 268    | 1.86    | 31.1    | 162    |
| Kd                          | μM                |                                                                       | Kd of binding of XylR repressor to the promoter                   | n/a    | n/a    | n/a    | 0.0129  | 0.0136  | 0.0142 |
| Kx                          | μM                |                                                                       | Kd of binding of xylose to the XylR repressor protein             | n/a    | n/a    | n/a    | 12.2    | 12.9    | 13.5   |
| n                           | n/a               |                                                                       | Hill coefficient of binding of XylR to the promoter               | n/a    | n/a    | n/a    | 1.74    | 1.77    | 1.8    |
| m                           | n/a               |                                                                       | Hill coefficient of binding of xylose to XylR                     | n/a    | n/a    | n/a    | 1.44    | 1.47    | 1.49   |
| ribo_deg_rate               | min <sup>-1</sup> | Inactivation rate of ribosomes (8)                                    |                                                                   | 0.0136 | 0.0137 | 0.0139 | 0.00544 | 0.00587 | 0.0063 |
| [NTP] <sub>0</sub>          | μM                | Initial NTP concentration                                             | Experimentally this was set to 5000 μM                            | 4550   | 4880   | 4990   | 5940    | 5970    | 6000   |
| [Ribo] <sub>0</sub>         | μM                | Initial ribosome concentration                                        | Upper bound set by mass spec experiments in this paper            | 2.41   | 2.48   | 2.5    | 1.36    | 1.43    | 1.5    |
| [IInd_nrg_src] <sub>0</sub> | μM                | Initial secondary energy source concentration (in μM NTP equivalents) | 3PGA was used as the secondary energy source in these experiments | 5270   | 5570   | 5830   | 4380    | 4530    | 4680   |
| [RNAP] <sub>0</sub>         | μM                | Initial RNAP concentration                                            | Upper bound set by mass spec experiments in this paper            | 0.0322 | 0.036  | 0.0404 | 0.0187  | 0.0205  | 0.0227 |

Table S10 – Model parameters and inferred values of the cell-free promoter competition experiment. (see Main text, Fig. 4, and S29-35)

| Parameter name     | Units                | Description                   | Notes                                                                                                                                                                                                                                                                                                                                                                                              | 5% quantile | Median | 95% quantile |
|--------------------|----------------------|-------------------------------|----------------------------------------------------------------------------------------------------------------------------------------------------------------------------------------------------------------------------------------------------------------------------------------------------------------------------------------------------------------------------------------------------|-------------|--------|--------------|
| tl_rate_gfp        | aa min <sup>-1</sup> | translation elongation rate   | Previous estimates for translation elongation rate are about 18 aa/s (18×60 = 1080 aa/min) <i>in vivo</i> and 1.5 aa/s (90 aa/min) <i>in vitro</i> (28). It is highly likely that this will vary depending on codon usage in the coding sequence.                                                                                                                                                  | 31.6        | 35.3   | 39.6         |
| tl_rate_rfp        | aa min <sup>-1</sup> | translation elongation rate   | as above                                                                                                                                                                                                                                                                                                                                                                                           | 1.87        | 2.02   | 2.2          |
| tl_escape_rate_gfp | min <sup>-1</sup>    | translation initiation rate   | This is the overall translation initiation rate defined to mean the binding of the 50s subunit to the already formed 30s:mRNA complex followed by GTP hydrolysis and Pi release.<br><br>Previously, 50S binding was found to be fast, GTP hydrolysis rate about 30 s <sup>-1</sup> , however, Pi release is about 1.5 s <sup>-1</sup> (90 min <sup>-1</sup> ) and dominates the overall rate (29). | 0.19        | 0.202  | 0.216        |
| tl_escape_rate_rfp | min <sup>-1</sup>    | translation initiation rate   | as above                                                                                                                                                                                                                                                                                                                                                                                           | 0.625       | 0.698  | 0.771        |
| tx_rate            | bp min <sup>-1</sup> | transcription elongation rate | Previously, mRNA elongation rate in cell-free has been estimated at about 3 bp/sec (180 NTPs/min) (30), but is estimated to be much faster in cells at up to 90 bp/sec (5400 bp/min)(31)                                                                                                                                                                                                           | 705         | 730    | 759          |
| tx_escape_rate_gfp | min <sup>-1</sup>    | promoter escape rate          | This is the composite rate constant of the rate limiting step in transcription initiation. Going by the terminology in Hsu LM, 2002 paper (32), this is likely dominated by either be k <sub>2</sub> or k <sub>E</sub> .<br><br>k <sub>E</sub> half-life values can range from 5 s (8.316 min <sup>-1</sup> ) to 10 min (0.0693 min <sup>-1</sup> ).                                               | 2.14        | 2.2    | 2.26         |
| tx_escape_rate_rfp | min <sup>-1</sup>    | promoter escape rate          | as above                                                                                                                                                                                                                                                                                                                                                                                           | 1.93        | 2.04   | 2.17         |
| ma_deg_rate        | min <sup>-1</sup>    | mRNA degradation rate         | Here we assume that the degradation rate is the same for all mRNA species.<br><br>mRNA half-life has been previously found to be around 5 min (0.14 min <sup>-1</sup> ) for <i>E. coli</i> : 21 min (0.032 min <sup>-1</sup> ) for <i>S. cerevisiae</i> : 600 min (0.0012 min <sup>-1</sup> ) for human HepG2/Bud8 cells so rate constant is 0.693 / 5 = 0.1386 min <sup>-1</sup> (32, 33).        | 0.0211      | 0.0216 | 0.0221       |
| gfp_mat_rate       | min <sup>-1</sup>    | GFP+ maturation rate          | Wildtype GFP is estimated to have a maturation rate of 0.0186 min <sup>-1</sup> , while the fastest folding GFP, GFPmut3 is estimated to have a rate of 0.132 min <sup>-1</sup> . GFP+, used in this study, is synonymous to GFPuv3 which has been estimated to have a maturation rate of 0.066 min <sup>-1</sup> (34).                                                                            | 0.0605      | 0.0654 | 0.0693       |
| rfp_mat_rate_1     | min <sup>-1</sup>    | mCherry maturation rate 1     | dsRed, from which mCherry is derived, has been proposed to have a three step maturation (36) with roughly three equal rates (0.00456 min <sup>-1</sup> ), although other models have been proposed (37).                                                                                                                                                                                           | 0.0201      | 0.0218 | 0.0236       |
| rfp_mat_rate_2     | min <sup>-1</sup>    | mCherry maturation rate 2     | as above                                                                                                                                                                                                                                                                                                                                                                                           | 0.0201      | 0.0218 | 0.0236       |

|                   |                         |                                                                                  |                                                                                                                                                                                                                                                                                                                                       |          |          |          |
|-------------------|-------------------------|----------------------------------------------------------------------------------|---------------------------------------------------------------------------------------------------------------------------------------------------------------------------------------------------------------------------------------------------------------------------------------------------------------------------------------|----------|----------|----------|
| rfp_mat_rate<br>3 | min <sup>-1</sup>       | mCherry maturation rate 3                                                        | as above                                                                                                                                                                                                                                                                                                                              | 0.0201   | 0.0218   | 0.0236   |
| ntp_deg_rate      | min <sup>-1</sup>       | NTP degradation rate                                                             | NTP degradation to NMP by non-productive NTPase side-reactions                                                                                                                                                                                                                                                                        | 0.0717   | 0.0755   | 0.0794   |
| Km_ntp_map        | μM                      | Michaelis constant for NTP binding RNAP in transcription reactions               |                                                                                                                                                                                                                                                                                                                                       | 168      | 225      | 295      |
| Km_ntp_ribo       | μM                      | Michaelis constant for NTP binding the ribosome in translation reactions         |                                                                                                                                                                                                                                                                                                                                       | 382      | 451      | 536      |
| Km_aa_ribo        | μM                      | Michaelis constant for amino acids binding the ribosome in translation reactions |                                                                                                                                                                                                                                                                                                                                       | 177      | 2070     | 4650     |
| koff_prom_gp      | min <sup>-1</sup>       | koff for the RNAP:promoter complex                                               | Previous work suggests that a KM_dna is likely fall between 0.001-0.2 μM . If initial binding of RNAP to the promoter is assumed to be in rapid equilibrium so that kon can be set to an arbitrarily high value (1000000 uM min <sup>-1</sup> ), koff would lie in the range 1000 min <sup>-1</sup> to 200000 min <sup>-1</sup> (35). | 306      | 557      | 876      |
| koff_prom_rfp     | min <sup>-1</sup>       | koff for the RNAP:promoter complex                                               | as above                                                                                                                                                                                                                                                                                                                              | 253      | 456      | 708      |
| koff_mrna_gp      | min <sup>-1</sup>       | koff for the ribosome:mRNA complex                                               | Previous work suggests that KM_mRNA is likely to range from 0.003 to 0.3 μM. If initial binding of the ribosome to the RBS is assumed to be in rapid equilibrium such that kon can be set to an arbitrarily high value (1000000 uM min <sup>-1</sup> ), koff would lie in the range 3000 to 300000 min <sup>-1</sup> .                | 3660     | 6190     | 8900     |
| koff_mrna_rfp     | min <sup>-1</sup>       | koff for the ribosome:mRNA complex                                               | as above                                                                                                                                                                                                                                                                                                                              | 161000   | 243000   | 294000   |
| regen_rate        | μM<br>min <sup>-1</sup> | Vmax for the NMP + lInd_nrg_src ->NTP reaction                                   |                                                                                                                                                                                                                                                                                                                                       | 350      | 730      | 976      |
| Km_lInd_nrg_src   | μM                      | Michaelis constant for lInd_nrg_src in NTP regeneration reaction                 |                                                                                                                                                                                                                                                                                                                                       | 6.51     | 91.3     | 462      |
| Km_nmp_regen      | μM                      | Michaelis constant for NMP in NTP regeneration reaction                          |                                                                                                                                                                                                                                                                                                                                       | 16.7     | 476      | 1600     |
| ribo_deg_rate     | min <sup>-1</sup>       | Inactivation rate of ribosomes (8)                                               |                                                                                                                                                                                                                                                                                                                                       | 9.52E-06 | 0.000127 | 0.000531 |

|                 |    |                                                                       |                                                                    |        |        |      |
|-----------------|----|-----------------------------------------------------------------------|--------------------------------------------------------------------|--------|--------|------|
| [NTP]0          | μM | Initial NTP concentration                                             | Experimentally this was set to 5000 μM                             | 4330   | 5080   | 5840 |
| [Ribo]0         | μM | Initial ribosome concentration                                        | Upper bound set by mass spec experiments in this paper             | 2.46   | 2.49   | 2.5  |
| [RNAP]0         | μM | Initial RNAP concentration                                            | Upper bound set by mass spec experiments in this paper             | 0.0786 | 0.0797 | 0.08 |
| [IInd_nrg_src]0 | μM | Initial secondary energy source concentration (in μM NTP equivalents) | 3-PGA was used as the secondary energy source in these experiments | 7870   | 8690   | 9690 |

Table S11 – Separation method for SRM LC-MS/MS analysis.

| <b>Time (minutes)</b> | <b>% Solvent A</b> | <b>% Solvent B</b> | <b>Flow rate (mL/min)</b> |
|-----------------------|--------------------|--------------------|---------------------------|
| 0                     | 97                 | 3                  | 0.2                       |
| 12.5                  | 60                 | 40                 | 0.2                       |
| 14.5                  | 10                 | 90                 | 0.2                       |
| 16.5                  | 0                  | 100                | 0.2                       |
| 17.50                 | 97                 | 3                  | 0.2                       |

Table S12 – RBS-6 library parts characterised in cell-free, *in vivo* and prediction software.

| Plasmid ID | RBS Sequence     | Cell-Free |         | Cells                 |       | Prediction software |              |
|------------|------------------|-----------|---------|-----------------------|-------|---------------------|--------------|
|            |                  | RFU       |         | RFU/OD <sub>600</sub> |       | RBS calculator      | UTR designer |
|            |                  | Mean      | SD      | Mean                  | SD    |                     |              |
| pRBBm258   | AGGAGGTGAATGTCAT | 78538.0   | 10975.7 | 302.6                 | 192.9 | 1008.4              | 458652.0     |
| pSM1211    | GAGGAGGTATTAT    | 49532.3   | 5381.9  | 617.4                 | 23.2  | 7517.8              | 2712828.8    |
| pSM1223    | AAGGGGGTATTAT    | 45537.0   | 5050.5  | 691.9                 | 143.1 | 18244.4             | 2789763.8    |
| pSM1228    | GGAGGAATTTATA    | 42143.1   | 5904.8  | 150.1                 | 27.9  | 3384.2              | 952164.3     |
| pSM1224    | GGAGGAAAATTAA    | 28905.9   | 4216.2  | 78.8                  | 15.2  | 2089.5              | 1369611.8    |
| pSM1210    | GAGGAGGTATTAT    | 27935.9   | 2963.6  | 140.3                 | 49.3  | 1349.4              | 447502.7     |
| pSM1220    | AGGGGAGATTAAT    | 27130.4   | 3670.2  | 96.1                  | 15.7  | 2085.9              | 427125.7     |
| pSM1205    | GGGGAGGTAATAT    | 23737.3   | 3091.8  | 138.0                 | 46.9  | 9781.1              | 2293781.9    |
| pSM1225    | AAGGGGGTTATAT    | 21144.8   | 11562.7 | 221.5                 | 54.3  | 20489.7             | 1594654.3    |
| pSM1230    | GGAGAGATATATT    | 14291.4   | 1904.5  | 18.5                  | 4.4   | 1705.9              | 188061.2     |
| pSM1214    | GAGGGGGATAATA    | 13755.6   | 2482.9  | 146.8                 | 32.4  | 2875.8              | 2358832.9    |
| pSM1222    | AGGGAGAAATAAAT   | 12429.0   | 2097.7  | 25.2                  | 4.6   | 2156.1              | 524541.1     |
| pSM1221    | AGGAGAGTATTAA    | 5779.4    | 870.1   | 7.9                   | 2.0   | 1519.3              | 226687.8     |
| pSM1206    | AGGAGAATATTAA    | 4290.8    | 557.5   | 6.2                   | 1.9   | 2595.7              | 354608.3     |
| pSM1209    | GGGGGAGTAATTT    | 3555.1    | 440.4   | 9.2                   | 2.5   | 2569.3              | 162064.4     |
| pSM1213    | AAAGAGGTATTAT    | 2738.3    | 589.6   | 3.5                   | 0.4   | 1813.3              | 244877.3     |
| pSM1217    | GAGAGGGATATAT    | 2475.1    | 188.6   | 6.0                   | 0.9   | 854.4               | 134449.4     |
| pSM1207    | AGAGGGGTAATAA    | 1531.3    | 184.9   | 1.9                   | 0.4   | 2324.3              | 237415.9     |
| pSM1212    | AGAGAAAAAATAT    | 1490.5    | 222.4   | 1.4                   | 0.2   | 330.1               | 17457.0      |
| pSM1233    | AAAAAAATTTTTT    | 1466.9    | 317.0   | 1.4                   | 0.2   | 136.7               | 862.3        |
| pSM1208    | GGGGAAATAAATA    | 1375.5    | 180.0   | 1.9                   | 0.3   | 556.7               | 116905.1     |
| pSM1229    | GAAGGAATAATAT    | 1342.8    | 200.4   | 1.5                   | 0.1   | 452.2               | 82034.8      |
| pSM1219    | AGAGGAATATTAT    | 1158.6    | 165.7   | 1.7                   | 0.2   | 999.5               | 116905.1     |
| pSM1232    | AAGAGGAATAAAT    | 1038.5    | 182.7   | 1.8                   | 0.3   | 633.1               | 126003.4     |
| pSM1227    | AGAAGGATAATAA    | 674.6     | 129.5   | 5.8                   | 2.2   | 903.4               | 62626.2      |
| pSM1204    | GAAAGGATAATAT    | 664.0     | 73.4    | 5.8                   | 1.4   | 238.0               | 51867.9      |
| pSM1215    | GGGGGAAAAATTA    | 486.8     | 36.7    | 34.8                  | 8.4   | 2402.4              | 761292.5     |

A selection of hits were chosen from the initial RBS library screens. DNA was repeat purified from a single colony, sequenced and then tested again in cell-free activity assays at the 2  $\mu$ L scale under a normalized DNA concentration of 10 nM. Four measurements for each DNA sample were tested in each assay. Mean and standard deviation of GFP fluorescence at the steady-state is shown as previously described (38). Data is ranked based on cell-free activity. To determine limit of detection (LOD – 461.63), this is defined as three standard deviations from the mean negative control background fluorescence (Mean – 347.3, s.d. – 34.43).

Table S13 - RBS-4, -5, -7 and -8 library parts. Experimental details described with accompanying Table S12 text. \*Cells shaded in grey fall below the LOD.

| Plasmid ID | RBS Sequence     | Spacer | Cell-Free |         | Prediction Software |              |
|------------|------------------|--------|-----------|---------|---------------------|--------------|
|            |                  |        | Mean      | SD      | RBS Calculator      | UTR Designer |
| pSM1243    | GGGGGGATTAAT     | 5      | 69838.9   | 11710.3 | 3385.1              | 861937.0     |
| pSM1254    | AAGGGGGAATATATA  | 8      | 69153.1   | 12431.4 | 6145.9              | 1448396.9    |
| pSM1240    | GGGGGGAATAAATT   | 7      | 63683.8   | 9509.9  | 1648.4              | 1064858.9    |
| pSM1291    | GGAGGGGTTTT      | 4      | 58368.6   | 10981.0 | 4272.1              | 535808.7     |
| pSM1242    | GGAGGGGAATTT     | 5      | 53757.1   | 7863.8  | 3786.5              | 1116081.1    |
| pSM1238    | GGAGGGTTTTT      | 4      | 47093.8   | 7402.4  | 3620.2              | 670147.1     |
| pSM1251    | GGGGAGGTAATTAAT  | 8      | 47056.9   | 7256.1  | 8293.5              | 1665761.4    |
| pSM1267    | GGGGGATTTAAAT    | 7      | 46297.8   | 9045.3  | 2756.1              | 389108.3     |
| pSM1245    | GGGAGGGTTTT      | 5      | 43475.6   | 8274.6  | 2583.1              | 815052.3     |
| pSM1255    | AGGGGGATATATTTT  | 7      | 37087.5   | 6675.7  | 5577.8              | 565996.9     |
| pSM1292    | GGAGGGATAAA      | 4      | 36294.9   | 5444.7  | 4172.3              | 2230524.9    |
| pSM1252    | AAAGGAGATATTTAT  | 7      | 35722.1   | 6764.7  | 5770.6              | 620368.6     |
| pSM1234    | GGGGGGATATTT     | 5      | 33990.6   | 5337.4  | 2959.5              | 1639878.2    |
| pSM1268    | AGGAGGGAATATTT   | 7      | 24542.5   | 4730.9  | 4630.9              | 2329986.2    |
| pSM1244    | GGAGAGGATTTT     | 5      | 24187.9   | 2692.6  | 1283.0              | 125160.5     |
| pSM1276    | AAGGAGGATATAAT   | 7      | 22790.1   | 3099.8  | 10946.9             | 3714776.6    |
| pSM1237    | AAGGAGGTAATT     | 5      | 22354.9   | 5337.7  | 19813.9             | 3198887.6    |
| pSM1248    | AGGAGGAAAATA     | 5      | 21737.8   | 3994.4  | 6632.8              | 3208430.7    |
| pSM1259    | GGGGGAGTTAAATAA  | 8      | 21350.3   | 4104.8  | 1018.7              | 133998.9     |
| pSM1256    | GGAGGAGTTTAAAAAT | 8      | 21100.1   | 4100.8  | 1027.4              | 215559.5     |
| pSM1253    | GAAGGAGTATATTTT  | 8      | 15396.1   | 2065.7  | 1386.9              | 126003.4     |
| pSM1293    | GGGGGAGATTA      | 4      | 14060.8   | 1483.5  | 3477.4              | 1019402.8    |
| pSM1265    | AGGGGGGAATTTTAA  | 7      | 12628.3   | 1074.2  | 3560.3              | 1283574.2    |
| pSM1236    | AAGGAGAATAAAT    | 6      | 12433.4   | 1725.9  | 3392.1              | 633694.7     |
| pSM1235    | AAGGAGGTTAAA     | 5      | 11802.8   | 1280.6  | 17904.2             | 2630169.0    |
| pSM1289    | GGGGGGAATTT      | 4      | 11477.8   | 1637.4  | 2829.8              | 988341.6     |
| pSM1261    | GGAGGAGTAAATTA   | 8      | 8651.8    | 753.2   | 500.7               | 421743.3     |
| pSM1272    | GAGGAGATATAATT   | 7      | 7091.3    | 911.1   | 1407.5              | 554714.6     |
| pSM1273    | GAGGGGGTTTTAAT   | 7      | 6906.8    | 1136.4  | 4339.9              | 733702.6     |
| pSM1239    | GGAGAAGAAAAT     | 5      | 5094.3    | 883.2   | 2435.7              | 239727.7     |
| pSM1266    | GGGGGAAAATTTTT   | 7      | 4872.0    | 580.7   | 2544.4              | 478568.2     |
| pSM1249    | GAAGAGGTTATATAT  | 8      | 4303.6    | 583.6   | 1081.8              | 28082.5      |
| pSM1285    | GGGGGAGTTAT      | 4      | 3152.0    | 271.3   | 1591.4              | 465891.2     |
| pSM1257    | AGAGGGGTTAATTTT  | 8      | 2816.3    | 452.7   | 2381.3              | 72024.7      |
| pSM1250    | AGAGGGGTTAATTTT  | 8      | 2764.3    | 453.5   | 2381.3              | 72024.7      |
| pSM1286    | GGAGGGATAAT      | 4      | 2642.9    | 366.8   | 4331.3              | 2230524.9    |
| pSM1258    | GAAGAGGTTATATAT  | 8      | 2560.6    | 958.1   | 1081.8              | 28082.5      |
| pSM1260    | AAAGAGGTAATTTAA  | 8      | 2528.8    | 1619.9  | 2701.1              | 130741.6     |
| pSM1290    | GAGGGGGATAT      | 4      | 2064.4    | 244.3   | 1339.1              | 781570.0     |
| pSM1241    | GAGGGGAATTTA     | 5      | 1905.8    | 280.5   | 694.8               | 251072.9     |
| pSM1271    | AGAAAGGATTATTA   | 7      | 1629.3    | 328.7   | 635.0               | 24377.1      |
| pSM1280    | GGAGAAGAAAA      | 4      | 1515.9    | 242.0   | 2617.3              | 266307.7     |
| pSM1282    | GGGGGAGTATT      | 4      | 1473.6    | 242.0   | 1071.0              | 616218.9     |
| pSM1278    | GGAGAAAAATAATA   | 7      | 1421.1    | 108.4   | 1949.7              | 147860.4     |
| pSM1262    | AGAAGGGTAAATTTT  | 8      | 1213.6    | 156.0   | 1393.0              | 22705.7      |
| pSM1218    | AGAGAGAAATAAT    | 6      | 1177.6    | 174.0   | 819.3               | 47348.4      |
| pSM1226    | GAAAGAATAAAT     | 6      | 1123.1    | 176.9   | 149.7               | 4002.5       |
| pSM1277    | AGAAGGAATTTATT   | 7      | 1080.9    | 195.7   | 1036.1              | 60311.8      |
| pSM1288    | AAGGGGGTTTT      | 4      | 1080.8    | 182.3   | 9166.9              | 642617.5     |
| pSM1283    | AGGGGGGTATT      | 4      | 1071.9    | 90.6    | 1770.1              | 1503428.4    |
| pSM1269    | GGAGAGGTTTATAT   | 7      | 1046.3    | 261.4   | 1642.5              | 85948.4      |
| pSM1275    | GAGGGAGAAATTTA   | 7      | 887.8     | 181.9   | 1890.0              | 201341.5     |
| pSM1287    | GAGGAGGTAAT      | 4      | 610.3     | 110.9   | 4328.6              | 1093222.2    |
| pSM1274    | AGAGAGGAATATTT   | 7      | 537.6     | 86.6    | 1557.6              | 172927.5     |
| pSM1281*   | GGGGGAAATAT      | 4      | 435.3     | 69.3    | 2941.3              | 1205635.7    |
| pSM1279*   | GGAGAAATTAT      | 4      | 424.5     | 73.9    | 3269.7              | 281626.6     |
| pSM1264*   | GGGAAAATAAAATT   | 7      | 402.1     | 75.4    | 157.8               | 47774.1      |
| pSM1284*   | GGAGAGAATAT      | 4      | 395.4     | 81.1    | 1745.1              | 231557.3     |
| pSM1270*   | GAAAAAATTTTTTT   | 7      | 377.8     | 24.6    | 172.5               | 1018.7       |



## Supplementary References

1. Stammen S, *et al.* (2010) High-yield intra- And extracellular protein production using *Bacillus megaterium*. *Appl Environ Microbiol* 76(12):4037–46.
2. Münch KM, *et al.* (2015) Polar fixation of plasmids during recombinant protein production in *Bacillus megaterium* results in population heterogeneity. *Appl Environ Microbiol* 81(17):5976–5986.
3. Malten M, *et al.* (2006) A *Bacillus megaterium* plasmid system for the production, export, and one-step purification of affinity-tagged heterologous levansucrase from growth medium. *Appl Environ Microbiol* 72(2):1677–9.
4. Moore SJ, *et al.* (2016) EcoFlex - A Multifunctional MoClo Kit for *E. coli* Synthetic Biology. *ACS Synth Biol*. doi:10.1021/acssynbio.6b00031.
5. Finger C, Gamer M, Klunkelfuß S, Bunk B, Biedendieck R (2015) Impact of rare codons and the functional coproduction of rate-limiting tRNAs on recombinant protein production in *Bacillus megaterium*. *Appl Microbiol Biotechnol* 99(21):8999–9010.
6. Livak KJ, Schmittgen TD (2001) Analysis of Relative Gene Expression Data Using Real-Time Quantitative PCR and the  $2^{-\Delta\Delta CT}$  Method. *Methods* 25(4):402–408.
7. Pfaffl MW (2001) A new mathematical model for relative quantification in real-time RT-PCR. *Nucleic Acids Res* 29(9):45e–45.
8. Failmezger J, *et al.* (2016) Site-Specific Cleavage of Ribosomal RNA in *Escherichia coli*-Based Cell-Free Protein Synthesis Systems. *PLoS One* 11(12):e0168764.
9. Hoops S, *et al.* (2006) COPASI - A COmplex PATHway Simulator. *Bioinformatics* 22(24):3067–3074.
10. Sameer A, Mierle K No Title. *Ceres Solver*. Available at: <http://ceres-solver.org>.
11. Lange KL, Little RJA, Taylor JMG, Lange L, Taylor MG (2013) Robust Statistical Modeling Using the t Distribution. *J Am Stat Assoc* 84(408):881–896.
12. Vihola M (2012) Robust adaptive Metropolis algorithm with coerced acceptance rate. *Stat Comput* 22(5):997–1008.
13. Gelman A, Rubin DB (1992) Inference from Iterative Simulation Using Multiple Sequences. *Stat Sci* 7(4):457–472.
14. Plummer M, Best N, Cowles K, Vines K (2006) CODA: convergence diagnosis and output analysis for MCMC. *R News* 6(1):7–11.
15. Weaver LJ, *et al.* (2015) A kinetic-based approach to understanding heterologous mevalonate pathway function in *E. coli*. *Biotechnol Bioeng* 112(1):111–9.
16. Al-Majdoub ZM, Carroll KM, Gaskell SJ, Barber J (2014) Quantification of the Proteins of the Bacterial Ribosome Using QconCAT Technology. *J Proteome Res* 13(3):1211–1222.
17. Pratt JM, *et al.* (2006) Multiplexed absolute quantification for proteomics using concatenated signature peptides encoded by QconCAT genes. *Nat Protoc* 1(2):1029–1043.
18. Sun ZZ, *et al.* (2013) Protocols for implementing an *Escherichia coli* based TX-TL cell-free expression system for synthetic biology. *J Vis Exp*

- 50762(79):e50762.
19. Kwon Y-C, Jewett MC (2015) High-throughput preparation methods of crude extract for robust cell-free protein synthesis. *Sci Rep* 5:8663.
  20. Cai Q, *et al.* (2015) A simplified and robust protocol for immunoglobulin expression in *Escherichia coli* cell-free protein synthesis systems. *Biotechnol Prog* 31(3):823–831.
  21. Rygus T, Hillen W (1991) Inducible high-level expression of heterologous genes in *Bacillus megaterium* using the regulatory elements of the xylose-utilization operon. *Appl Microbiol Biotechnol* 35(5):594–9.
  22. Lowe TM, Eddy SR (1997) tRNAscan-SE: a program for improved detection of transfer RNA genes in genomic sequence. *Nucleic Acids Res* 25(5):955–64.
  23. Krebs HA, Ruffo A, Johnson M, Egglestone LV, Hems R (1953) Oxidative phosphorylation. *Biochem J* 54(1):107–16.
  24. Lou C, Stanton B, Chen Y-J, Munsky B, Voigt CA (2012) Ribozyme-based insulator parts buffer synthetic circuits from genetic context. *Nat Biotechnol* 30(11):1137–42.
  25. Sawano a, Miyawaki a (2000) Directed evolution of green fluorescent protein by a new versatile PCR strategy for site-directed and semi-random mutagenesis. *Nucleic Acids Res* 28(16):E78.
  26. Eppinger M, *et al.* (2011) Genome sequences of the biotechnologically important *Bacillus megaterium* strains QM B1551 and DSM319. *J Bacteriol* 193(16):4199–213.
  27. Garamella J, Marshall R, Rustad M, Noireaux V (2016) The all *E. coli* TX-TL Toolbox 2.0: a platform for cell-free synthetic biology. *ACS Synth Biol* 5(4):344–55.
  28. Underwood KA, Swartz JR, Puglisi JD (2005) Quantitative polysome analysis identifies limitations in bacterial cell-free protein synthesis. *Biotechnol Bioeng* 91(4):425–435.
  29. Tomsic J, *et al.* (2000) Late events of translation initiation in bacteria: a kinetic analysis. *EMBO J* 19(9):2127–2136.
  30. Siegal-Gaskins D, Tuza ZA, Kim J, Noireaux V, Murray RM (2014) Gene circuit performance characterization and resource usage in a cell-free “breadboard.” *ACS Synth Biol* 3(6):416–425.
  31. Dennis PP, Ehrenberg M, Fange D, Bremer H (2009) Varying rate of RNA chain elongation during *rrn* transcription in *Escherichia coli*. *J Bacteriol* 191(11):3740–3746.
  32. Bernstein JA, Khodursky AB, Lin P-H, Lin-Chao S, Cohen SN (2002) Global analysis of mRNA decay and abundance in *Escherichia coli* at single-gene resolution using two-color fluorescent DNA microarrays. *Proc Natl Acad Sci U S A* 99(15):9697–702.
  33. Wang Y, *et al.* (2002) Precision and functional specificity in mRNA decay. *Proc Natl Acad Sci U S A* 99(9):5860–5.
  34. Iizuka R, Yamagishi-Shirasaki M, Funatsu T (2011) Kinetic study of de novo chromophore maturation of fluorescent proteins. *Anal Biochem* 414(2):173–8.
  35. Karzbrun E, Shin J, Bar-Ziv RH, Noireaux V (2011) Coarse-grained dynamics of protein synthesis in a cell-free system. *Phys Rev Lett* 106(4):48104.
  36. Verkhusha V V, Akovbian NA, Efremenko EN, Varfolomeyev SD,

- Vrzheshch P V (2001) Kinetic analysis of maturation and denaturation of DsRed, a coral-derived red fluorescent protein. *Biochemistry (Mosc)* 66(12):1342–51.
37. Hebisch E, Knebel J, Landsberg J, Frey E, Leisner M (2013) High Variation of Fluorescence Protein Maturation Times in Closely Related *Escherichia coli* Strains. *PLoS One* 8(10):e75991.
  38. Salis HM (2011) The ribosome binding site calculator. *Methods Enzymol* 498:19–42.
